# Supplementary material for: Transcriptomic Insights into Heat and Hypoxia Stress in Rainbow Trout: A Meta-Analysis of Public RNA-Seq Data
Source: Research Square preprint supplement (doi:10.21203/rs.3.rs-6710656/v1), 2025-06-03
Supplement: Supplementary file 5 [file c1b24a7ff5bb2ce9882128b5.xlsx]

## Sheet: DEGs_Meta-analysis
Supplemetary Tabel S4A: Differentilly expressed upregulated and downregulated genes.
Gene_ID	Gene_Symbol	log2FoldChange	adj.P	Regulation	Gene_Description
ENSOMYG00000029610	scn1ba	20.7238	1.0585e-25	UP	sodium channel, voltage-gated, type I, beta a [Source:ZFIN;Acc:ZDB-GENE-060503-604]
ENSOMYG00000010447	hspa1b	8.13459	0.0412752	UP	heat shock protein family A (Hsp70) member 1B [Source:ZFIN;Acc:ZDB-GENE-060503-867]
ENSOMYG00000005025	slitrk3b	7.8492	7.18516e-05	UP	SLIT and NTRK-like family, member 3b [Source:ZFIN;Acc:ZDB-GENE-070912-352]
ENSOMYG00000034757	hspa4l	7.41921	0.0446925	UP	heat shock protein 4 like [Source:ZFIN;Acc:ZDB-GENE-030131-2412]
ENSOMYG00000029994	as3mt	7.06332	0.000354443	UP	arsenite methyltransferase [Source:ZFIN;Acc:ZDB-GENE-060312-15]
ENSOMYG00000054931	prom1b	7.00934	0.000393343	UP	prominin 1 b [Source:ZFIN;Acc:ZDB-GENE-031003-1]
ENSOMYG00000023837	HTR1B	7.00009	0.000400397	UP	5-hydroxytryptamine receptor 1B [Source:HGNC Symbol;Acc:HGNC:5287]
ENSOMYG00000036455	trpc3	6.61812	2.103e-07	UP	transient receptor potential cation channel, subfamily C, member 3 [Source:ZFIN;Acc:ZDB-GENE-140129-1]
ENSOMYG00000018660	casq2	6.41662	4.40883e-05	UP	calsequestrin 2 [Source:ZFIN;Acc:ZDB-GENE-010724-12]
ENSOMYG00000062678	tmem121b	6.35266	7.66057e-07	UP	transmembrane protein 121B [Source:ZFIN;Acc:ZDB-GENE-070705-241]
ENSOMYG00000021686	pdzd7a	6.25718	6.36944e-06	UP	PDZ domain containing 7a [Source:ZFIN;Acc:ZDB-GENE-090313-191]
ENSOMYG00000044394	rcvrn3	6.24941	4.76288e-06	UP	recoverin 3 [Source:ZFIN;Acc:ZDB-GENE-040426-1661]
ENSOMYG00000001466	gc2	6.19389	2.77611e-07	UP	guanylyl cyclase 2 [Source:ZFIN;Acc:ZDB-GENE-011128-8]
ENSOMYG00000053172	prom1b	6.13596	3.72423e-06	UP	prominin 1 b [Source:ZFIN;Acc:ZDB-GENE-031003-1]
ENSOMYG00000032225	hk2	5.8329	0.000132129	UP	hexokinase 2 [Source:ZFIN;Acc:ZDB-GENE-040426-2017]
ENSOMYG00000015551	CA12	5.63799	0.00102139	UP	carbonic anhydrase 12 [Source:HGNC Symbol;Acc:HGNC:1371]
ENSOMYG00000015268	SORCS1	5.59149	0.00113848	UP	sortilin related VPS10 domain containing receptor 1 [Source:HGNC Symbol;Acc:HGNC:16697]
ENSOMYG00000068944	rbp1.1	5.58359	5.1952e-05	UP	retinol binding protein 1, cellular, tandem duplicate 1 [Source:ZFIN;Acc:ZDB-GENE-050421-2]
ENSOMYG00000043818	PURG	5.5644	0.000107922	UP	purine rich element binding protein G [Source:HGNC Symbol;Acc:HGNC:17930]
ENSOMYG00000025223	ST18	5.53186	4.34161e-08	UP	ST18 C2H2C-type zinc finger transcription factor [Source:HGNC Symbol;Acc:HGNC:18695]
ENSOMYG00000051922	rgs9a	5.45125	8.37815e-06	UP	regulator of G protein signaling 9a [Source:ZFIN;Acc:ZDB-GENE-060929-92]
ENSOMYG00000037923	HTR3A	5.41314	0.000221613	UP	5-hydroxytryptamine receptor 3A [Source:HGNC Symbol;Acc:HGNC:5297]
ENSOMYG00000034954	faim2b	5.39288	8.58832e-07	UP	Fas apoptotic inhibitory molecule 2b [Source:ZFIN;Acc:ZDB-GENE-120426-3]
ENSOMYG00000015364	LRRC7	5.3592	7.78598e-06	UP	leucine rich repeat containing 7 [Source:HGNC Symbol;Acc:HGNC:18531]
ENSOMYG00000048908	npb	5.31558	0.000107698	UP	neuropeptide B [Source:ZFIN;Acc:ZDB-GENE-040107-40]
ENSOMYG00000046051	arxb	5.28079	0.000310469	UP	aristaless related homeobox b [Source:ZFIN;Acc:ZDB-GENE-121109-2]
ENSOMYG00000032181	TNNT2	5.25264	0.000286249	UP	troponin T2, cardiac type [Source:HGNC Symbol;Acc:HGNC:11949]
ENSOMYG00000030883	CDH10	5.2438	0.00303032	UP	cadherin 10 [Source:HGNC Symbol;Acc:HGNC:1749]
ENSOMYG00000014946	zic6	5.19535	0.000280979	UP	zic family member 6 [Source:ZFIN;Acc:ZDB-GENE-061207-1]
ENSOMYG00000074918	dusp19a	5.15403	0.00125243	UP	dual specificity phosphatase 19a [Source:ZFIN;Acc:ZDB-GENE-081104-382]
ENSOMYG00000013812	abhd14a	5.15177	0.00126675	UP	abhydrolase domain containing 14A [Source:ZFIN;Acc:ZDB-GENE-040426-2428]
ENSOMYG00000020294	pyya	5.1455	0.00158521	UP	peptide YYa [Source:NCBI gene;Acc:30211]
ENSOMYG00000049908	SLC9A5	5.13982	0.000100651	UP	solute carrier family 9 member A5 [Source:HGNC Symbol;Acc:HGNC:11078]
ENSOMYG00000045760	hcrtr2	5.13827	6.51906e-06	UP	hypocretin (orexin) receptor 2 [Source:ZFIN;Acc:ZDB-GENE-070228-3]
ENSOMYG00000021533	GCG	5.1285	0.000145407	UP	glucagon [Source:HGNC Symbol;Acc:HGNC:4191]
ENSOMYG00000007086	glra3	5.1134	6.51774e-05	UP	glycine receptor, alpha 3 [Source:ZFIN;Acc:ZDB-GENE-020402-1]
ENSOMYG00000035915	fam161a	5.09863	0.0016701	UP	FAM161 centrosomal protein A [Source:ZFIN;Acc:ZDB-GENE-110310-1]
ENSOMYG00000032452	chrm4b	5.09753	0.000462959	UP	cholinergic receptor, muscarinic 4b [Source:ZFIN;Acc:ZDB-GENE-090410-7]
ENSOMYG00000015167	chrnb1l	5.09401	0.00164999	UP	cholinergic receptor, nicotinic, beta 1 (muscle) like [Source:ZFIN;Acc:ZDB-GENE-060811-1]
ENSOMYG00000018391	CLUL1	5.06877	0.00212689	UP	clusterin like 1 [Source:HGNC Symbol;Acc:HGNC:2096]
ENSOMYG00000043025	dhrs12la	5.06449	0.00174877	UP	dehydrogenase/reductase 12-like a [Source:ZFIN;Acc:ZDB-GENE-030131-8104]
ENSOMYG00000028778	inavaa	5.04399	3.07169e-06	UP	innate immunity activator a [Source:ZFIN;Acc:ZDB-GENE-081105-161]
ENSOMYG00000041216	ccnh	5.0399	0.000775928	UP	cyclin H [Source:ZFIN;Acc:ZDB-GENE-050320-13]
ENSOMYG00000019093	KCNK2	4.99149	0.000223402	UP	potassium two pore domain channel subfamily K member 2 [Source:HGNC Symbol;Acc:HGNC:6277]
ENSOMYG00000021564	zcchc14	4.96197	0.00111089	UP	zinc finger, CCHC domain containing 14 [Source:ZFIN;Acc:ZDB-GENE-060503-319]
ENSOMYG00000028583	dnaaf6	4.95516	0.00105086	UP	dynein axonemal assembly factor 6 [Source:ZFIN;Acc:ZDB-GENE-040722-2]
ENSOMYG00000004858	SLC24A1	4.94194	0.000150466	UP	solute carrier family 24 member 1 [Source:HGNC Symbol;Acc:HGNC:10975]
ENSOMYG00000016047	asz1	4.93298	0.00250901	UP	ankyrin repeat, SAM and basic leucine zipper domain containing 1 [Source:ZFIN;Acc:ZDB-GENE-040426-988]
ENSOMYG00000054850	col9a1b	4.92055	0.00700945	UP	collagen, type IX, alpha 1b [Source:ZFIN;Acc:ZDB-GENE-040426-2410]
ENSOMYG00000028286	c1qtnf4	4.91609	0.000608586	UP	C1q and TNF related 4 [Source:ZFIN;Acc:ZDB-GENE-050417-198]
ENSOMYG00000046789	TCFL5	4.87594	0.00102811	UP	transcription factor like 5 [Source:HGNC Symbol;Acc:HGNC:11646]
ENSOMYG00000054038	slc6a3	4.86861	0.00128554	UP	solute carrier family 6 member 3 [Source:ZFIN;Acc:ZDB-GENE-010316-1]
ENSOMYG00000001367	gabrb3	4.79283	0.00105668	UP	gamma-aminobutyric acid type A receptor subunit beta3 [Source:ZFIN;Acc:ZDB-GENE-101102-2]
ENSOMYG00000002014	cplx4c	4.78468	0.00952778	UP	complexin 4c [Source:ZFIN;Acc:ZDB-GENE-101018-1]
ENSOMYG00000016205	NEUROD1	4.78468	0.00952778	UP	neuronal differentiation 1 [Source:HGNC Symbol;Acc:HGNC:7762]
ENSOMYG00000014303	sp5l	4.77475	0.00422258	UP	Sp5 transcription factor-like [Source:ZFIN;Acc:ZDB-GENE-030131-2981]
ENSOMYG00000065868	ahcy	4.76944	0.000316437	UP	adenosylhomocysteinase [Source:ZFIN;Acc:ZDB-GENE-031219-6]
ENSOMYG00000033358	oafb	4.74079	0.00456247	UP	OAF homolog b (Drosophila) [Source:ZFIN;Acc:ZDB-GENE-121017-2]
ENSOMYG00000021045	UNC79	4.74079	0.00456247	UP	unc-79 homolog, NALCN channel complex subunit [Source:HGNC Symbol;Acc:HGNC:19966]
ENSOMYG00000046586	tnr	4.7175	0.00241046	UP	tenascin R (restrictin, janusin) [Source:ZFIN;Acc:ZDB-GENE-030804-1]
ENSOMYG00000045550	sst1.2	4.70704	0.00131675	UP	somatostatin 1, tandem duplicate 2 [Source:ZFIN;Acc:ZDB-GENE-100910-2]
ENSOMYG00000057241	C8orf34	4.70541	0.00131095	UP	chromosome 8 open reading frame 34 [Source:HGNC Symbol;Acc:HGNC:30905]
ENSOMYG00000037914	HTR3B	4.70533	0.00521741	UP	5-hydroxytryptamine receptor 3B [Source:HGNC Symbol;Acc:HGNC:5298]
ENSOMYG00000007610	HSD17B1	4.68398	0.00557333	UP	hydroxysteroid 17-beta dehydrogenase 1 [Source:HGNC Symbol;Acc:HGNC:5210]
ENSOMYG00000055358	ppp2r5b	4.68141	0.00248221	UP	protein phosphatase 2, regulatory subunit B', beta [Source:ZFIN;Acc:ZDB-GENE-101208-1]
ENSOMYG00000003894	GPR61	4.62652	2.31325e-05	UP	G protein-coupled receptor 61 [Source:HGNC Symbol;Acc:HGNC:13300]
ENSOMYG00000044747	twf2b	4.62047	0.0027446	UP	twinfilin actin-binding protein 2b [Source:ZFIN;Acc:ZDB-GENE-050522-238]
ENSOMYG00000042170	rundc3ab	4.61171	0.00283382	UP	RUN domain containing 3Ab [Source:ZFIN;Acc:ZDB-GENE-040426-842]
ENSOMYG00000052956	gnb3b	4.60601	0.000204758	UP	guanine nucleotide binding protein (G protein), beta polypeptide 3b [Source:ZFIN;Acc:ZDB-GENE-040426-2280]
ENSOMYG00000013906	si:ch73-261i21.5	4.59354	0.000128717	UP	si:ch73-261i21.5 [Source:ZFIN;Acc:ZDB-GENE-110411-258]
ENSOMYG00000044923	FAM131A	4.59216	0.0146623	UP	family with sequence similarity 131 member A [Source:HGNC Symbol;Acc:HGNC:28308]
ENSOMYG00000056380	nanos3	4.58707	0.00750148	UP	nanos homolog 3 [Source:ZFIN;Acc:ZDB-GENE-011221-1]
ENSOMYG00000042648	zgc:158258	4.57204	0.0154517	UP	zgc:158258 [Source:ZFIN;Acc:ZDB-GENE-070112-2272]
ENSOMYG00000009329	cntnap1	4.54135	0.00842601	UP	contactin associated protein 1 [Source:ZFIN;Acc:ZDB-GENE-030916-2]
ENSOMYG00000047290	tlx3b	4.52449	0.00426373	UP	T cell leukemia homeobox 3b [Source:ZFIN;Acc:ZDB-GENE-021021-1]
ENSOMYG00000045597	rgs7a	4.51886	0.0037193	UP	regulator of G protein signaling 7a [Source:ZFIN;Acc:ZDB-GENE-040718-276]
ENSOMYG00000076560	usp21	4.51567	4.66218e-08	UP	ubiquitin specific peptidase 21 [Source:ZFIN;Acc:ZDB-GENE-100210-3]
ENSOMYG00000036471	TMEM91	4.50237	0.00377377	UP	transmembrane protein 91 [Source:HGNC Symbol;Acc:HGNC:32393]
ENSOMYG00000037721	mpped1	4.49196	0.00449902	UP	metallophosphoesterase domain containing 1 [Source:ZFIN;Acc:ZDB-GENE-111104-1]
ENSOMYG00000038368	foxi1	4.48531	0.0183944	UP	forkhead box i1 [Source:ZFIN;Acc:ZDB-GENE-030505-1]
ENSOMYG00000035463	rpp25b	4.45826	0.00967316	UP	ribonuclease P and MRP subunit p25, b [Source:ZFIN;Acc:ZDB-GENE-170530-4]
ENSOMYG00000041454	galns	4.43693	0.0019317	UP	galactosamine (N-acetyl)-6-sulfatase [Source:ZFIN;Acc:ZDB-GENE-070112-1152]
ENSOMYG00000030588	KCNMB4	4.40047	0.00130551	UP	potassium calcium-activated channel subfamily M regulatory beta subunit 4 [Source:HGNC Symbol;Acc:HGNC:6289]
ENSOMYG00000076221	lmx1ba	4.39797	0.0129225	UP	LIM homeobox transcription factor 1, beta a [Source:ZFIN;Acc:ZDB-GENE-050114-3]
ENSOMYG00000018927	tm6sf2b	4.39797	0.0129225	UP	transmembrane 6 superfamily member 2b [Source:ZFIN;Acc:ZDB-GENE-060503-338]
ENSOMYG00000000237	PLCZ1	4.39006	0.000315339	UP	phospholipase C zeta 1 [Source:HGNC Symbol;Acc:HGNC:19218]
ENSOMYG00000061203	fndc4a	4.36991	0.0232694	UP	fibronectin type III domain containing 4a [Source:ZFIN;Acc:ZDB-GENE-041014-146]
ENSOMYG00000073725	wnt1	4.36991	0.0232694	UP	wingless-type MMTV integration site family, member 1 [Source:ZFIN;Acc:ZDB-GENE-980526-526]
ENSOMYG00000012923	glmnb	4.36374	0.0129686	UP	glomulin, FKBP associated protein b [Source:ZFIN;Acc:ZDB-GENE-080723-14]
ENSOMYG00000031738	SGCG	4.35309	0.00273529	UP	sarcoglycan gamma [Source:HGNC Symbol;Acc:HGNC:10809]
ENSOMYG00000037698	cnrip1a	4.32236	0.0255346	UP	cannabinoid receptor interacting protein 1a [Source:ZFIN;Acc:ZDB-GENE-040801-126]
ENSOMYG00000019939	srxn1	4.30937	0.0140366	UP	sulfiredoxin 1 homolog (S. cerevisiae) [Source:ZFIN;Acc:ZDB-GENE-091230-2]
ENSOMYG00000003140	tnni3k	4.28662	0.00451941	UP	TNNI3 interacting kinase [Source:ZFIN;Acc:ZDB-GENE-081104-399]
ENSOMYG00000005341	capn5b	4.27337	0.00537814	UP	calpain 5b [Source:ZFIN;Acc:ZDB-GENE-091116-29]
ENSOMYG00000038086	caln1	4.25684	0.000477819	UP	calneuron 1 [Source:ZFIN;Acc:ZDB-GENE-130313-1]
ENSOMYG00000006019	cax1	4.24997	0.0033399	UP	cation/H+ exchanger protein 1 [Source:ZFIN;Acc:ZDB-GENE-030131-3044]
ENSOMYG00000012135	DGKB	4.24595	4.42676e-12	UP	diacylglycerol kinase beta [Source:HGNC Symbol;Acc:HGNC:2850]
ENSOMYG00000045572	BBS7	4.24445	0.0297045	UP	Bardet-Biedl syndrome 7 [Source:HGNC Symbol;Acc:HGNC:18758]
ENSOMYG00000017851	TMEM252	4.23734	0.0125663	UP	transmembrane protein 252 [Source:HGNC Symbol;Acc:HGNC:28537]
ENSOMYG00000007493	gdf5	4.22778	0.00861771	UP	growth differentiation factor 5 [Source:ZFIN;Acc:ZDB-GENE-990415-39]
ENSOMYG00000030422	atp6ap1la	4.22043	0.0169538	UP	ATPase H+ transporting accessory protein 1 like a [Source:ZFIN;Acc:ZDB-GENE-110318-1]
ENSOMYG00000060958	SV2C	4.2124	0.0173777	UP	synaptic vesicle glycoprotein 2C [Source:HGNC Symbol;Acc:HGNC:30670]
ENSOMYG00000003268	PDE8B	4.20341	0.00140335	UP	phosphodiesterase 8B [Source:HGNC Symbol;Acc:HGNC:8794]
ENSOMYG00000029111	moxd1l	4.19695	0.0324166	UP	monooxygenase, DBH-like 1, like [Source:ZFIN;Acc:ZDB-GENE-060126-3]
ENSOMYG00000036561	si:dkey-7k24.5	4.18677	0.00687581	UP	si:dkey-7k24.5 [Source:ZFIN;Acc:ZDB-GENE-131127-626]
ENSOMYG00000000423	uts2r3	4.18157	0.00133794	UP	urotensin-2 receptor 3 [Source:ZFIN;Acc:ZDB-GENE-100922-123]
ENSOMYG00000020892	pax6b	4.17074	0.0104345	UP	paired box 6b [Source:ZFIN;Acc:ZDB-GENE-001031-1]
ENSOMYG00000008320	slc6a4b	4.13237	0.0120367	UP	solute carrier family 6 member 4b [Source:ZFIN;Acc:ZDB-GENE-060314-2]
ENSOMYG00000021648	gdap1l1	4.12335	6.38464e-05	UP	ganglioside induced differentiation associated protein 1-like 1 [Source:ZFIN;Acc:ZDB-GENE-080812-2]
ENSOMYG00000066705	dpysl4	4.10703	0.0383069	UP	dihydropyrimidinase like 4 [Source:ZFIN;Acc:ZDB-GENE-050720-3]
ENSOMYG00000051819	kif25	4.10703	0.0383069	UP	kinesin family member 25 [Source:ZFIN;Acc:ZDB-GENE-041001-167]
ENSOMYG00000031187	MYT1L	4.10703	0.0383069	UP	myelin transcription factor 1 like [Source:HGNC Symbol;Acc:HGNC:7623]
ENSOMYG00000005629	HOXA1	4.10583	0.00124247	UP	homeobox A1 [Source:HGNC Symbol;Acc:HGNC:5099]
ENSOMYG00000045715	en2b	4.10466	0.00879013	UP	engrailed homeobox 2b [Source:ZFIN;Acc:ZDB-GENE-980526-40]
ENSOMYG00000033545	GABRB2	4.09952	0.0228427	UP	gamma-aminobutyric acid type A receptor subunit beta2 [Source:HGNC Symbol;Acc:HGNC:4082]
ENSOMYG00000040697	lrrc47	4.09952	0.0228427	UP	leucine rich repeat containing 47 [Source:ZFIN;Acc:ZDB-GENE-060503-289]
ENSOMYG00000000183	onecutl	4.09952	0.0228427	UP	one cut domain, family member, like [Source:ZFIN;Acc:ZDB-GENE-020531-1]
ENSOMYG00000034752	dscamb	4.09042	0.0223769	UP	Down syndrome cell adhesion molecule b [Source:ZFIN;Acc:ZDB-GENE-031118-67]
ENSOMYG00000040160	ogfrl1	4.07973	0.00374678	UP	opioid growth factor receptor-like 1 [Source:ZFIN;Acc:ZDB-GENE-061207-32]
ENSOMYG00000018937	ALDH6A1	4.05965	0.0407359	UP	aldehyde dehydrogenase 6 family member A1 [Source:HGNC Symbol;Acc:HGNC:7179]
ENSOMYG00000020562	BICDL1	4.05965	0.0407359	UP	BICD family like cargo adaptor 1 [Source:HGNC Symbol;Acc:HGNC:28095]
ENSOMYG00000021755	cnrip1a	4.05965	0.0407359	UP	cannabinoid receptor interacting protein 1a [Source:ZFIN;Acc:ZDB-GENE-040801-126]
ENSOMYG00000063943	CLCA1	4.05965	0.0407359	UP	chloride channel accessory 1 [Source:HGNC Symbol;Acc:HGNC:2015]
ENSOMYG00000042230	defbl3	4.05965	0.0407359	UP	defensin, beta-like 3 [Source:ZFIN;Acc:ZDB-GENE-070207-3]
ENSOMYG00000064695	dlb	4.05965	0.0407359	UP	deltaB [Source:ZFIN;Acc:ZDB-GENE-980526-114]
ENSOMYG00000064522	TMEM42	4.04667	0.00479023	UP	transmembrane protein 42 [Source:HGNC Symbol;Acc:HGNC:28444]
ENSOMYG00000033132	pou1f1	4.03374	0.000531098	UP	POU class 1 homeobox 1 [Source:HGNC Symbol;Acc:HGNC:9210]
ENSOMYG00000028432	paqr8	4.03327	0.00115158	UP	progestin and adipoQ receptor family member VIII [Source:ZFIN;Acc:ZDB-GENE-030728-3]
ENSOMYG00000045808	trim107	4.01566	5.08245e-05	UP	tripartite motif containing 107 [Source:ZFIN;Acc:ZDB-GENE-110919-5]
ENSOMYG00000036798	sst1.1	3.98666	0.0172375	UP	somatostatin 1, tandem duplicate 1 [Source:ZFIN;Acc:ZDB-GENE-030131-4743]
ENSOMYG00000069939	fndc5b	3.96405	5.07309e-06	UP	fibronectin type III domain containing 5b [Source:ZFIN;Acc:ZDB-GENE-060503-916]
ENSOMYG00000010011	OLA1	3.93896	0.0037179	UP	Obg like ATPase 1 [Source:HGNC Symbol;Acc:HGNC:28833]
ENSOMYG00000039042	cyp26a1	3.91077	0.0137009	UP	cytochrome P450, family 26, subfamily A, polypeptide 1 [Source:ZFIN;Acc:ZDB-GENE-990415-44]
ENSOMYG00000051004	rgs9a	3.89366	0.000380492	UP	regulator of G protein signaling 9a [Source:ZFIN;Acc:ZDB-GENE-060929-92]
ENSOMYG00000018609	zgc:91968	3.89085	0.00642497	UP	zgc:91968 [Source:ZFIN;Acc:ZDB-GENE-040704-1]
ENSOMYG00000074373	tpbgl	3.85337	0.000969895	UP	trophoblast glycoprotein-like [Source:ZFIN;Acc:ZDB-GENE-120209-2]
ENSOMYG00000022398	nkx3.3	3.84897	0.0213355	UP	NK3 homeobox 3 [Source:ZFIN;Acc:ZDB-GENE-050306-27]
ENSOMYG00000007057	etv1	3.82896	0.0246787	UP	ETS variant transcription factor 1 [Source:ZFIN;Acc:ZDB-GENE-070104-1]
ENSOMYG00000022212	necap1	3.82352	0.00685486	UP	NECAP endocytosis associated 1 [Source:ZFIN;Acc:ZDB-GENE-040426-1682]
ENSOMYG00000035130	scn3b	3.81254	0.0193909	UP	sodium channel, voltage-gated, type III, beta [Source:ZFIN;Acc:ZDB-GENE-070920-2]
ENSOMYG00000046020	foxj1b	3.77799	0.0164678	UP	forkhead box J1b [Source:ZFIN;Acc:ZDB-GENE-041212-76]
ENSOMYG00000038021	zbtb16b	3.77674	0.0455097	UP	zinc finger and BTB domain containing 16b [Source:ZFIN;Acc:ZDB-GENE-100923-1]
ENSOMYG00000009271	rspo1	3.77361	0.00147736	UP	R-spondin 1 [Source:ZFIN;Acc:ZDB-GENE-040718-44]
ENSOMYG00000033712	fbxo16	3.76662	0.00953212	UP	F-box protein 16 [Source:ZFIN;Acc:ZDB-GENE-041015-747]
ENSOMYG00000004532	grm3	3.73345	0.0318232	UP	glutamate receptor, metabotropic 3 [Source:ZFIN;Acc:ZDB-GENE-061009-13]
ENSOMYG00000017855	GPR149	3.72695	0.00704802	UP	G protein-coupled receptor 149 [Source:HGNC Symbol;Acc:HGNC:23627]
ENSOMYG00000008952	KCNF1	3.71572	0.0150926	UP	potassium voltage-gated channel modifier subfamily F member 1 [Source:HGNC Symbol;Acc:HGNC:6246]
ENSOMYG00000013981	ccndx	3.68479	0.0125754	UP	cyclin Dx [Source:ZFIN;Acc:ZDB-GENE-080917-47]
ENSOMYG00000032494	npb	3.68398	0.00177294	UP	neuropeptide B [Source:ZFIN;Acc:ZDB-GENE-040107-40]
ENSOMYG00000033635	ghrhrb	3.67648	0.0258699	UP	growth hormone releasing hormone receptor b [Source:ZFIN;Acc:ZDB-GENE-110127-2]
ENSOMYG00000067625	prrx1a	3.67233	0.00322848	UP	paired related homeobox 1a [Source:ZFIN;Acc:ZDB-GENE-020905-5]
ENSOMYG00000014190	ARF3	3.64892	0.0179715	UP	ADP ribosylation factor 3 [Source:HGNC Symbol;Acc:HGNC:654]
ENSOMYG00000032851	nr4a1	3.63961	0.0388466	UP	nuclear receptor subfamily 4, group A, member 1 [Source:ZFIN;Acc:ZDB-GENE-040704-11]
ENSOMYG00000026404	ppp1r14d	3.62084	0.0124459	UP	zgc:162989 [Source:ZFIN;Acc:ZDB-GENE-070410-123]
ENSOMYG00000042950	bag3	3.61611	0.0392651	UP	BCL2 associated athanogene 3 [Source:ZFIN;Acc:ZDB-GENE-040801-40]
ENSOMYG00000014218	opn1sw1	3.61522	0.00126046	UP	opsin 1 (cone pigments), short-wave-sensitive 1 [Source:ZFIN;Acc:ZDB-GENE-991109-25]
ENSOMYG00000037216	mpp4a	3.61141	6.68078e-05	UP	MAGUK p55 scaffold protein 4a [Source:ZFIN;Acc:ZDB-GENE-070912-523]
ENSOMYG00000046860	LRRN3	3.57778	0.000407119	UP	leucine rich repeat neuronal 3 [Source:HGNC Symbol;Acc:HGNC:17200]
ENSOMYG00000072083	si:ch211-132f19.7	3.57771	0.0221283	UP	si:ch211-132f19.7 [Source:ZFIN;Acc:ZDB-GENE-130530-619]
ENSOMYG00000043489	tmem266	3.57225	0.0116113	UP	transmembrane protein 266 [Source:ZFIN;Acc:ZDB-GENE-070112-2382]
ENSOMYG00000020171	nppal	3.56856	0.0160111	UP	natriuretic peptide A-like [Source:ZFIN;Acc:ZDB-GENE-081022-175]
ENSOMYG00000031004	fndc4a	3.5584	0.0320346	UP	fibronectin type III domain containing 4a [Source:ZFIN;Acc:ZDB-GENE-041014-146]
ENSOMYG00000046435	dntt	3.55651	0.00594124	UP	deoxynucleotidyltransferase, terminal [Source:ZFIN;Acc:ZDB-GENE-071020-1]
ENSOMYG00000016001	tas1r1	3.54924	0.0208083	UP	taste receptor, type 1, member 1 [Source:ZFIN;Acc:ZDB-GENE-060208-2]
ENSOMYG00000032134	ADARB2	3.54629	0.0209151	UP	adenosine deaminase RNA specific B2 (inactive) [Source:HGNC Symbol;Acc:HGNC:227]
ENSOMYG00000031894	ankrd34c	3.54285	0.000128596	UP	ankyrin repeat domain 34C [Source:ZFIN;Acc:ZDB-GENE-121105-3]
ENSOMYG00000018665	cdr2b	3.54084	0.0147889	UP	si:ch1073-272o11.3 [Source:ZFIN;Acc:ZDB-GENE-121214-325]
ENSOMYG00000017456	SNORD69	3.53915	0.00847705	UP	small nucleolar RNA, C/D box 69 [Source:HGNC Symbol;Acc:HGNC:32730]
ENSOMYG00000029978	isl2a	3.53279	0.0115155	UP	ISL LIM homeobox 2a [Source:ZFIN;Acc:ZDB-GENE-980526-562]
ENSOMYG00000021662	acbd6	3.52352	0.0224001	UP	acyl-CoA binding domain containing 6 [Source:ZFIN;Acc:ZDB-GENE-030131-2810]
ENSOMYG00000062799	scg3	3.50385	0.00373112	UP	secretogranin III [Source:ZFIN;Acc:ZDB-GENE-040426-1725]
ENSOMYG00000018814	p2rx3b	3.49533	0.0300399	UP	purinergic receptor P2X, ligand-gated ion channel, 3b [Source:ZFIN;Acc:ZDB-GENE-030319-3]
ENSOMYG00000073376	ppef1	3.48544	0.0233874	UP	protein phosphatase, EF-hand calcium binding domain 1 [Source:ZFIN;Acc:ZDB-GENE-080303-27]
ENSOMYG00000049248	zgc:165481	3.47453	0.0123718	UP	zgc:165481 [Source:ZFIN;Acc:ZDB-GENE-070615-21]
ENSOMYG00000042218	rad9b	3.47251	0.000369834	UP	RAD9 checkpoint clamp component B [Source:ZFIN;Acc:ZDB-GENE-040910-3]
ENSOMYG00000028916	tnni1c	3.46878	0.00525224	UP	troponin I, skeletal, slow c [Source:ZFIN;Acc:ZDB-GENE-060825-192]
ENSOMYG00000004128	cpo	3.44785	0.0213278	UP	carboxypeptidase O [Source:ZFIN;Acc:ZDB-GENE-070619-6]
ENSOMYG00000032924	rnf224	3.43102	0.00250495	UP	ring finger protein 224 [Source:ZFIN;Acc:ZDB-GENE-070705-92]
ENSOMYG00000015450	lrrtm1	3.42132	0.0272531	UP	leucine rich repeat transmembrane neuronal 1 [Source:ZFIN;Acc:ZDB-GENE-050506-80]
ENSOMYG00000028036	prph2b	3.4139	0.00524589	UP	peripherin 2b (retinal degeneration, slow) [Source:ZFIN;Acc:ZDB-GENE-000616-9]
ENSOMYG00000036719	zgc:92429	3.3962	0.0130317	UP	zgc:92429 [Source:ZFIN;Acc:ZDB-GENE-040801-194]
ENSOMYG00000057264	tmem237a	3.38867	0.0139345	UP	transmembrane protein 237a [Source:ZFIN;Acc:ZDB-GENE-070402-3]
ENSOMYG00000026815	tmc2b	3.38655	0.0119812	UP	transmembrane channel-like 2b [Source:ZFIN;Acc:ZDB-GENE-060526-262]
ENSOMYG00000029277	sulf2a	3.38512	4.48264e-06	UP	sulfatase 2a [Source:ZFIN;Acc:ZDB-GENE-040426-759]
ENSOMYG00000031235	MIR146B	3.38446	0.00248561	UP	microRNA 146b [Source:HGNC Symbol;Acc:HGNC:32079]
ENSOMYG00000024971	celf3a	3.37713	0.00673636	UP	cugbp, Elav-like family member 3a [Source:ZFIN;Acc:ZDB-GENE-000501-2]
ENSOMYG00000026668	KCNA10	3.37641	0.0199761	UP	potassium voltage-gated channel subfamily A member 10 [Source:HGNC Symbol;Acc:HGNC:6219]
ENSOMYG00000021621	GABRB1	3.3763	0.0199807	UP	gamma-aminobutyric acid type A receptor subunit beta1 [Source:HGNC Symbol;Acc:HGNC:4081]
ENSOMYG00000047530	slc4a3	3.3726	0.000357683	UP	solute carrier family 4 member 3 [Source:ZFIN;Acc:ZDB-GENE-141006-1]
ENSOMYG00000060655	KBTBD13	3.35764	0.0316325	UP	kelch repeat and BTB domain containing 13 [Source:HGNC Symbol;Acc:HGNC:37227]
ENSOMYG00000016715	MYH6	3.35104	2.64685e-05	UP	myosin heavy chain 6 [Source:HGNC Symbol;Acc:HGNC:7576]
ENSOMYG00000021913	bhlha15	3.33888	0.0020745	UP	basic helix-loop-helix family, member a15 [Source:ZFIN;Acc:ZDB-GENE-070803-3]
ENSOMYG00000033824	scamp5b	3.32428	0.0118913	UP	secretory carrier membrane protein 5b [Source:ZFIN;Acc:ZDB-GENE-120215-76]
ENSOMYG00000010157	myoz2b	3.29303	0.00447062	UP	myozenin 2b [Source:ZFIN;Acc:ZDB-GENE-040426-1853]
ENSOMYG00000040669	myl13	3.27125	0.017704	UP	myosin, light chain 13 [Source:ZFIN;Acc:ZDB-GENE-040426-1593]
ENSOMYG00000012048	EN1	3.27068	0.00232226	UP	engrailed homeobox 1 [Source:HGNC Symbol;Acc:HGNC:3342]
ENSOMYG00000029553	p4ha1b	3.25128	0.000331059	UP	prolyl 4-hydroxylase, alpha polypeptide I b [Source:ZFIN;Acc:ZDB-GENE-030131-4089]
ENSOMYG00000018326	gja8a	3.24011	0.0310489	UP	gap junction protein alpha 8 paralog a [Source:ZFIN;Acc:ZDB-GENE-050616-14]
ENSOMYG00000034531	CREM	3.21936	0.0490991	UP	cAMP responsive element modulator [Source:HGNC Symbol;Acc:HGNC:2352]
ENSOMYG00000012271	vkorc1l1	3.21015	2.99443e-14	UP	vitamin K epoxide reductase complex, subunit 1-like 1 [Source:ZFIN;Acc:ZDB-GENE-050522-210]
ENSOMYG00000015548	shha	3.20622	0.000110344	UP	sonic hedgehog signaling molecule a [Source:ZFIN;Acc:ZDB-GENE-980526-166]
ENSOMYG00000013273	acp5a	3.20564	0.0348975	UP	acid phosphatase 5a, tartrate resistant [Source:ZFIN;Acc:ZDB-GENE-040426-2864]
ENSOMYG00000000213	pip5kl1	3.17434	1.1563e-07	UP	phosphatidylinositol-4-phosphate 5-kinase-like 1 [Source:ZFIN;Acc:ZDB-GENE-060526-248]
ENSOMYG00000036731	opn6b	3.16473	7.81251e-05	UP	opsin 6, group member b [Source:ZFIN;Acc:ZDB-GENE-030616-402]
ENSOMYG00000021458	bsk146	3.16098	0.040229	UP	brain specific kinase 146 [Source:ZFIN;Acc:ZDB-GENE-060313-3]
ENSOMYG00000037862	sgtb	3.15186	0.0400557	UP	small glutamine rich tetratricopeptide repeat co-chaperone beta [Source:ZFIN;Acc:ZDB-GENE-040704-72]
ENSOMYG00000007650	bsnb	3.1464	0.00811975	UP	bassoon (presynaptic cytomatrix protein) b [Source:ZFIN;Acc:ZDB-GENE-120628-1]
ENSOMYG00000014709	RGS2	3.13644	0.00831741	UP	regulator of G protein signaling 2 [Source:HGNC Symbol;Acc:HGNC:9998]
ENSOMYG00000035798	cuzd1.2	3.11913	0.0198349	UP	CUB and zona pellucida-like domains 1, tandem duplicate 1 [Source:ZFIN;Acc:ZDB-GENE-131122-16]
ENSOMYG00000039833	gjd6	3.11511	0.00168584	UP	gap junction protein delta 6 [Source:ZFIN;Acc:ZDB-GENE-050616-5]
ENSOMYG00000008646	slc7a10b	3.11061	0.0329521	UP	solute carrier family 7 member 10b [Source:ZFIN;Acc:ZDB-GENE-121105-2]
ENSOMYG00000053819	scrn3	3.10641	0.0287936	UP	secernin 3 [Source:ZFIN;Acc:ZDB-GENE-030131-4783]
ENSOMYG00000031433	si:dkey-219e21.2	3.1009	0.00867914	UP	si:dkey-219e21.2 [Source:ZFIN;Acc:ZDB-GENE-141215-26]
ENSOMYG00000016034	rnf207b	3.09214	0.0457457	UP	ring finger protein 207b [Source:ZFIN;Acc:ZDB-GENE-080227-9]
ENSOMYG00000039686	kcnk3a	3.07432	2.68566e-05	UP	potassium channel, subfamily K, member 3a [Source:ZFIN;Acc:ZDB-GENE-040724-171]
ENSOMYG00000035544	olfm4.2	3.05145	0.000487042	UP	si:ch211-173a9.6 [Source:ZFIN;Acc:ZDB-GENE-030131-4623]
ENSOMYG00000040793	cars2	3.04042	0.011656	UP	cysteinyl-tRNA synthetase 2, mitochondrial [Source:ZFIN;Acc:ZDB-GENE-030131-5564]
ENSOMYG00000011303	mb	3.02354	0.0122442	UP	myoglobin [Source:ZFIN;Acc:ZDB-GENE-040426-1430]
ENSOMYG00000015823	cplx4a	3.01991	0.00537009	UP	complexin 4a [Source:ZFIN;Acc:ZDB-GENE-060526-116]
ENSOMYG00000035608	esrrb	2.95259	0.00424011	UP	estrogen-related receptor beta [Source:ZFIN;Acc:ZDB-GENE-040616-2]
ENSOMYG00000040831	kbtbd13b	2.94492	0.0137787	UP	si:ch211-253p14.2 [Source:ZFIN;Acc:ZDB-GENE-131127-524]
ENSOMYG00000013266	dazl	2.92849	0.000304453	UP	deleted in azoospermia-like [Source:ZFIN;Acc:ZDB-GENE-000405-6]
ENSOMYG00000004613	USP50	2.90109	0.0104897	UP	ubiquitin specific peptidase 50 [Source:HGNC Symbol;Acc:HGNC:20079]
ENSOMYG00000009309	ST3GAL1	2.8995	0.0486345	UP	ST3 beta-galactoside alpha-2,3-sialyltransferase 1 [Source:HGNC Symbol;Acc:HGNC:10862]
ENSOMYG00000008299	si:dkey-219e21.2	2.8645	0.0163603	UP	si:dkey-219e21.2 [Source:ZFIN;Acc:ZDB-GENE-141215-26]
ENSOMYG00000012532	ywhag1	2.84461	0.00600989	UP	3-monooxygenase/tryptophan 5-monooxygenase activation protein, gamma polypeptide 1 [Source:ZFIN;Acc:ZDB-GENE-011115-1]
ENSOMYG00000021257	nfe2l1a	2.84385	0.0155625	UP	nfe2 like bZIP transcription factor 1a [Source:ZFIN;Acc:ZDB-GENE-040630-5]
ENSOMYG00000000959	clrn3	2.82667	0.0212975	UP	clarin 3 [Source:ZFIN;Acc:ZDB-GENE-170623-3]
ENSOMYG00000072819	gem	2.78827	0.00765075	UP	GTP binding protein overexpressed in skeletal muscle [Source:ZFIN;Acc:ZDB-GENE-060825-251]
ENSOMYG00000018779	avpr2b.1	2.78465	0.0168483	UP	si:dkey-178o16.4 [Source:ZFIN;Acc:ZDB-GENE-131127-163]
ENSOMYG00000022744	MYBPC3	2.76487	0.00247849	UP	myosin binding protein C3 [Source:HGNC Symbol;Acc:HGNC:7551]
ENSOMYG00000000925	ddit4	2.75097	0.00707842	UP	DNA-damage-inducible transcript 4 [Source:ZFIN;Acc:ZDB-GENE-031002-35]
ENSOMYG00000041779	dhrs12la	2.7226	0.000139751	UP	dehydrogenase/reductase 12-like a [Source:ZFIN;Acc:ZDB-GENE-030131-8104]
ENSOMYG00000037528	MAFG	2.70562	0.0342713	UP	MAF bZIP transcription factor G [Source:HGNC Symbol;Acc:HGNC:6781]
ENSOMYG00000043498	bnip1a	2.68774	0.00707595	UP	BCL2 interacting protein 1a [Source:ZFIN;Acc:ZDB-GENE-081107-44]
ENSOMYG00000014354	scn5lab	2.68767	0.0338613	UP	sodium channel, voltage gated, type V-like, alpha b [Source:ZFIN;Acc:ZDB-GENE-060908-3]
ENSOMYG00000020417	KLHL29	2.67217	1.66512e-05	UP	kelch like family member 29 [Source:HGNC Symbol;Acc:HGNC:29404]
ENSOMYG00000006284	iqsec1b	2.67026	0.0486927	UP	IQ motif and Sec7 domain ArfGEF 1b [Source:ZFIN;Acc:ZDB-GENE-120813-1]
ENSOMYG00000000567	TPH1	2.66151	0.000156433	UP	tryptophan hydroxylase 1 (tryptophan 5-monooxygenase) a [Source:ZFIN;Acc:ZDB-GENE-030317-1]
ENSOMYG00000027025	GJA3	2.6596	0.00389253	UP	gap junction protein alpha 3 [Source:HGNC Symbol;Acc:HGNC:4277]
ENSOMYG00000001673	tmem269	2.65582	8.60631e-05	UP	transmembrane protein 269 [Source:ZFIN;Acc:ZDB-GENE-090313-227]
ENSOMYG00000031289	slc13a5a	2.63622	0.0330918	UP	solute carrier family 13 member 5a [Source:ZFIN;Acc:ZDB-GENE-030131-4628]
ENSOMYG00000047243	adra2b	2.60065	0.0291972	UP	adrenoceptor alpha 2B [Source:ZFIN;Acc:ZDB-GENE-021010-2]
ENSOMYG00000005425	plek2	2.59057	0.0369222	UP	pleckstrin 2 [Source:ZFIN;Acc:ZDB-GENE-080219-2]
ENSOMYG00000029805	trim3b	2.58263	0.0416827	UP	tripartite motif containing 3b [Source:ZFIN;Acc:ZDB-GENE-070112-1132]
ENSOMYG00000015396	ribc2	2.58112	0.045411	UP	RIB43A domain with coiled-coils 2 [Source:ZFIN;Acc:ZDB-GENE-050411-27]
ENSOMYG00000011661	pou3f3b	2.5748	0.0371858	UP	POU class 3 homeobox 3b [Source:ZFIN;Acc:ZDB-GENE-980526-140]
ENSOMYG00000010194	fkbp5	2.52239	0.0340054	UP	FKBP prolyl isomerase 5 [Source:ZFIN;Acc:ZDB-GENE-030616-630]
ENSOMYG00000014149	casq2	2.48924	0.0113688	UP	calsequestrin 2 [Source:ZFIN;Acc:ZDB-GENE-010724-12]
ENSOMYG00000023489	lrrc4.2	2.46505	0.0226348	UP	leucine rich repeat containing 4.2 [Source:ZFIN;Acc:ZDB-GENE-030131-7997]
ENSOMYG00000037448	cbx7a	2.46258	0.0414728	UP	chromobox homolog 7a [Source:ZFIN;Acc:ZDB-GENE-050417-400]
ENSOMYG00000023289	tmem269	2.44021	0.0376459	UP	transmembrane protein 269 [Source:ZFIN;Acc:ZDB-GENE-090313-227]
ENSOMYG00000040968	ctsc	2.43766	0.0419329	UP	cathepsin C [Source:ZFIN;Acc:ZDB-GENE-030619-9]
ENSOMYG00000042685	grk5	2.43119	0.0334122	UP	G protein-coupled receptor kinase 5 [Source:ZFIN;Acc:ZDB-GENE-091204-274]
ENSOMYG00000041445	hsp47	2.42623	0.0266385	UP	serpin peptidase inhibitor, clade H (heat shock protein 47), member 1b [Source:ZFIN;Acc:ZDB-GENE-990415-93]
ENSOMYG00000031371	tubb2	2.42518	0.0449199	UP	tubulin, beta 2A class IIa [Source:ZFIN;Acc:ZDB-GENE-050522-384]
ENSOMYG00000041329	MXI1	2.42094	0.00582108	UP	MAX interactor 1, dimerization protein [Source:HGNC Symbol;Acc:HGNC:7534]
ENSOMYG00000045788	serpinh1b	2.41558	0.0440454	UP	serpin peptidase inhibitor, clade H (heat shock protein 47), member 1b [Source:ZFIN;Acc:ZDB-GENE-990415-93]
ENSOMYG00000020125	nr4a1	2.40378	0.0415658	UP	nuclear receptor subfamily 4, group A, member 1 [Source:ZFIN;Acc:ZDB-GENE-040704-11]
ENSOMYG00000016183	ptn	2.36752	0.00747063	UP	pleiotrophin [Source:ZFIN;Acc:ZDB-GENE-030624-1]
ENSOMYG00000024088	MAST1	2.35814	0.0194501	UP	microtubule associated serine/threonine kinase 1 [Source:HGNC Symbol;Acc:HGNC:19034]
ENSOMYG00000034542	adap2	2.34749	0.0344325	UP	ArfGAP with dual PH domains 2 [Source:ZFIN;Acc:ZDB-GENE-070912-21]
ENSOMYG00000019410	opn5	2.34709	0.014365	UP	opsin 5 [Source:ZFIN;Acc:ZDB-GENE-041001-179]
ENSOMYG00000023455	steap2	2.33777	0.0053525	UP	STEAP family member 2, metalloreductase [Source:ZFIN;Acc:ZDB-GENE-131121-79]
ENSOMYG00000009144	slc6a4b	2.32824	0.0201847	UP	solute carrier family 6 member 4b [Source:ZFIN;Acc:ZDB-GENE-060314-2]
ENSOMYG00000016957	nr4a3	2.30676	4.14961e-05	UP	nuclear receptor subfamily 4, group A, member 3 [Source:ZFIN;Acc:ZDB-GENE-070824-4]
ENSOMYG00000039537	ZBTB21	2.30494	0.00555116	UP	zinc finger and BTB domain containing 21 [Source:HGNC Symbol;Acc:HGNC:13083]
ENSOMYG00000018467	EGLN3	2.29453	1.0685e-05	UP	egl-9 family hypoxia inducible factor 3 [Source:HGNC Symbol;Acc:HGNC:14661]
ENSOMYG00000014781	pnp5a	2.28529	0.00115094	UP	purine nucleoside phosphorylase 5a [Source:ZFIN;Acc:ZDB-GENE-040426-2553]
ENSOMYG00000043789	ddhd1a	2.26341	0.0220536	UP	DDHD domain containing 1a [Source:ZFIN;Acc:ZDB-GENE-111020-16]
ENSOMYG00000068030	ddit4	2.23093	0.00746566	UP	DNA-damage-inducible transcript 4 [Source:ZFIN;Acc:ZDB-GENE-031002-35]
ENSOMYG00000040021	g6pc1b	2.22163	0.00085745	UP	glucose-6-phosphatase catalytic subunit 1b [Source:ZFIN;Acc:ZDB-GENE-081223-2]
ENSOMYG00000037566	pgr	2.21707	0.000593798	UP	progesterone receptor [Source:ZFIN;Acc:ZDB-GENE-990415-214]
ENSOMYG00000054631	hhatlb	2.21477	0.00751462	UP	hedgehog acyltransferase like, b [Source:ZFIN;Acc:ZDB-GENE-050506-130]
ENSOMYG00000047326	nlgn2b	2.19202	0.00723899	UP	neuroligin 2b [Source:ZFIN;Acc:ZDB-GENE-090918-3]
ENSOMYG00000051284	gem	2.18886	0.0116901	UP	GTP binding protein overexpressed in skeletal muscle [Source:ZFIN;Acc:ZDB-GENE-060825-251]
ENSOMYG00000018612	trim54	2.18304	0.0342528	UP	tripartite motif containing 54 [Source:ZFIN;Acc:ZDB-GENE-041014-342]
ENSOMYG00000020277	pfkfb3	2.17962	0.00591767	UP	6-phosphofructo-2-kinase/fructose-2,6-biphosphatase 3 [Source:ZFIN;Acc:ZDB-GENE-040426-2724]
ENSOMYG00000071592	HMX1	2.17641	0.0357558	UP	H6 family homeobox 1 [Source:HGNC Symbol;Acc:HGNC:5017]
ENSOMYG00000014975	aanat1	2.17088	0.0467048	UP	arylalkylamine N-acetyltransferase 1 [Source:ZFIN;Acc:ZDB-GENE-040329-1]
ENSOMYG00000003468	eogt	2.15392	0.00210765	UP	EGF domain-specific O-linked N-acetylglucosamine (GlcNAc) transferase [Source:ZFIN;Acc:ZDB-GENE-120813-8]
ENSOMYG00000032453	gcgb	2.15325	3.81362e-11	UP	glucagon b [Source:ZFIN;Acc:ZDB-GENE-040712-2]
ENSOMYG00000069516	hspa13	2.13686	0.0249049	UP	heat shock protein 70 family, member 13 [Source:ZFIN;Acc:ZDB-GENE-070410-58]
ENSOMYG00000039486	fam177a1	2.12857	0.00336987	UP	family with sequence similarity 177 member A1 [Source:ZFIN;Acc:ZDB-GENE-070928-21]
ENSOMYG00000028239	glt8d1	2.11983	0.00330355	UP	glycosyltransferase 8 domain containing 1 [Source:ZFIN;Acc:ZDB-GENE-041114-23]
ENSOMYG00000045488	dhx32b	2.11891	0.000246162	UP	DEAH (Asp-Glu-Ala-His) box polypeptide 32b [Source:ZFIN;Acc:ZDB-GENE-130613-5]
ENSOMYG00000033284	slc13a3	2.11873	0.0376986	UP	solute carrier family 13 member 3 [Source:ZFIN;Acc:ZDB-GENE-040426-2486]
ENSOMYG00000019964	SLC39A12	2.10276	0.0361988	UP	solute carrier family 39 member 12 [Source:HGNC Symbol;Acc:HGNC:20860]
ENSOMYG00000041283	p4ha2	2.09354	0.00841561	UP	procollagen-proline, 2-oxoglutarate 4-dioxygenase (proline 4-hydroxylase), alpha polypeptide 2 [Source:ZFIN;Acc:ZDB-GENE-030827-1]
ENSOMYG00000043018	sh3bp4a	2.08872	0.0410682	UP	SH3-domain binding protein 4a [Source:ZFIN;Acc:ZDB-GENE-040303-3]
ENSOMYG00000016610	vill	2.0846	0.00160407	UP	villin-like [Source:ZFIN;Acc:ZDB-GENE-081222-1]
ENSOMYG00000023853	ankrd16	2.08002	0.00505572	UP	ankyrin repeat domain 16 [Source:ZFIN;Acc:ZDB-GENE-041210-253]
ENSOMYG00000012103	pcsk1	2.07419	0.00104232	UP	proprotein convertase subtilisin/kexin type 1 [Source:ZFIN;Acc:ZDB-GENE-071009-1]
ENSOMYG00000068359	TTC29	2.06076	0.0274553	UP	tetratricopeptide repeat domain 29 [Source:HGNC Symbol;Acc:HGNC:29936]
ENSOMYG00000052151	cacna1c	2.05129	0.0334132	UP	calcium channel, voltage-dependent, L type, alpha 1C subunit [Source:ZFIN;Acc:ZDB-GENE-020129-1]
ENSOMYG00000015914	commd7	2.04869	0.0258092	UP	COMM domain containing 7 [Source:ZFIN;Acc:ZDB-GENE-040801-96]
ENSOMYG00000006320	slc16a5b	2.04019	0.0055436	UP	solute carrier family 16 member 5b [Source:ZFIN;Acc:ZDB-GENE-131120-181]
ENSOMYG00000007775	arl11	2.03927	0.0354772	UP	ADP-ribosylation factor-like 11 [Source:ZFIN;Acc:ZDB-GENE-030131-3410]
ENSOMYG00000044415	stard14	2.02875	0.0234065	UP	START domain containing 14 [Source:ZFIN;Acc:ZDB-GENE-040426-963]
ENSOMYG00000047279	HOXC4	2.02586	0.0479106	UP	homeobox C4 [Source:HGNC Symbol;Acc:HGNC:5126]
ENSOMYG00000056982	nr4a3	2.02525	0.000413871	UP	nuclear receptor subfamily 4, group A, member 3 [Source:ZFIN;Acc:ZDB-GENE-070824-4]
ENSOMYG00000026585	ero1a	2.02338	1.39422e-07	UP	endoplasmic reticulum oxidoreductase 1 alpha [Source:ZFIN;Acc:ZDB-GENE-040426-1312]
ENSOMYG00000040212	grm2b	2.02139	0.0171279	UP	glutamate receptor, metabotropic 2b [Source:ZFIN;Acc:ZDB-GENE-060201-5]
ENSOMYG00000023370	scxb	2.01324	0.0101826	UP	scleraxis bHLH transcription factor b [Source:ZFIN;Acc:ZDB-GENE-090806-1]
ENSOMYG00000043088	odad1	2.00878	0.0317243	UP	outer dynein arm docking complex subunit 1 [Source:ZFIN;Acc:ZDB-GENE-041114-110]
ENSOMYG00000034679	SSH1	2.00464	0.0116036	UP	slingshot protein phosphatase 1 [Source:HGNC Symbol;Acc:HGNC:30579]
ENSOMYG00000037424	slc43a1a	2.00462	0.00250849	UP	solute carrier family 43 member 1a [Source:ZFIN;Acc:ZDB-GENE-030131-6327]
ENSOMYG00000020219	KCNH4	1.99985	0.00215669	UP	potassium voltage-gated channel subfamily H member 4 [Source:HGNC Symbol;Acc:HGNC:6253]
ENSOMYG00000008992	dnajc3b	1.99594	0.00777843	UP	DnaJ (Hsp40) homolog, subfamily C, member 3b [Source:ZFIN;Acc:ZDB-GENE-000831-4]
ENSOMYG00000056512	NETO2	1.99484	0.0482016	UP	neuropilin and tolloid like 2 [Source:HGNC Symbol;Acc:HGNC:14644]
ENSOMYG00000022411	rhoub	1.9865	0.0292427	UP	ras homolog family member Ub [Source:ZFIN;Acc:ZDB-GENE-050417-308]
ENSOMYG00000014971	marveld2b	1.98551	0.0439642	UP	MARVEL domain containing 2b [Source:ZFIN;Acc:ZDB-GENE-050208-54]
ENSOMYG00000012156	ZMYND10	1.97998	0.0161859	UP	zinc finger MYND-type containing 10 [Source:HGNC Symbol;Acc:HGNC:19412]
ENSOMYG00000057268	alg2	1.97191	0.0101653	UP	ALG2 alpha-1,3/1,6-mannosyltransferase [Source:ZFIN;Acc:ZDB-GENE-060502-2]
ENSOMYG00000062698	lcor	1.9686	0.0132355	UP	ligand dependent nuclear receptor corepressor [Source:ZFIN;Acc:ZDB-GENE-061201-6]
ENSOMYG00000028743	klf9	1.9657	8.05094e-11	UP	Kruppel like factor 9 [Source:ZFIN;Acc:ZDB-GENE-060526-244]
ENSOMYG00000037257	slc8a3	1.96288	0.0169444	UP	solute carrier family 8 member 3 [Source:ZFIN;Acc:ZDB-GENE-050810-1]
ENSOMYG00000046233	fkbp5	1.95448	2.99744e-05	UP	FKBP prolyl isomerase 5 [Source:ZFIN;Acc:ZDB-GENE-030616-630]
ENSOMYG00000054359	chrnb5a	1.93784	0.0164085	UP	cholinergic receptor, nicotinic, beta 5a [Source:ZFIN;Acc:ZDB-GENE-090312-169]
ENSOMYG00000066942	s1pr5b	1.93572	0.00339343	UP	sphingosine-1-phosphate receptor 5b [Source:ZFIN;Acc:ZDB-GENE-061201-27]
ENSOMYG00000031231	GADD45B	1.93484	0.00340022	UP	growth arrest and DNA damage inducible beta [Source:HGNC Symbol;Acc:HGNC:4096]
ENSOMYG00000045085	CIT	1.90947	0.0030915	UP	citron rho-interacting serine/threonine kinase [Source:HGNC Symbol;Acc:HGNC:1985]
ENSOMYG00000020447	relch	1.89877	0.00218511	UP	RAB11 binding and LisH domain, coiled-coil and HEAT repeat containing [Source:ZFIN;Acc:ZDB-GENE-040426-1507]
ENSOMYG00000045812	hspa13	1.89617	0.0184428	UP	heat shock protein 70 family, member 13 [Source:ZFIN;Acc:ZDB-GENE-070410-58]
ENSOMYG00000020127	adamts6	1.89407	0.000981943	UP	ADAM metallopeptidase with thrombospondin type 1 motif, 6 [Source:ZFIN;Acc:ZDB-GENE-091113-9]
ENSOMYG00000016177	cilp2	1.89366	0.00720949	UP	cartilage intermediate layer protein 2 [Source:ZFIN;Acc:ZDB-GENE-050208-436]
ENSOMYG00000032859	rprm3	1.87168	0.00344253	UP	reprimo, TP53 dependent G2 arrest mediator homolog 3 [Source:ZFIN;Acc:ZDB-GENE-040718-123]
ENSOMYG00000027426	cited1	1.85306	0.00417537	UP	Cbp/p300-interacting transactivator, with Glu/Asp-rich carboxy-terminal domain, 1 [Source:ZFIN;Acc:ZDB-GENE-030131-5596]
ENSOMYG00000068207	zgc:153031	1.8372	0.0475819	UP	zgc:153031 [Source:ZFIN;Acc:ZDB-GENE-060929-1190]
ENSOMYG00000015307	mknk2b	1.83534	0.0223778	UP	MAPK interacting serine/threonine kinase 2b [Source:ZFIN;Acc:ZDB-GENE-030829-2]
ENSOMYG00000047289	eif4ebp3	1.82394	0.023047	UP	eukaryotic translation initiation factor 4E binding protein 3 [Source:ZFIN;Acc:ZDB-GENE-041114-44]
ENSOMYG00000073963	alg1	1.8213	0.00102491	UP	ALG1 chitobiosyldiphosphodolichol beta-mannosyltransferase [Source:ZFIN;Acc:ZDB-GENE-030131-6093]
ENSOMYG00000019753	PPP1R27	1.819	0.0298937	UP	protein phosphatase 1 regulatory subunit 27 [Source:HGNC Symbol;Acc:HGNC:16813]
ENSOMYG00000040066	slc7a5	1.81365	0.0011003	UP	solute carrier family 7 member 5 [Source:ZFIN;Acc:ZDB-GENE-080818-4]
ENSOMYG00000035031	csdc2b	1.79309	0.0040844	UP	cold shock domain containing C2, RNA binding b [Source:ZFIN;Acc:ZDB-GENE-110419-1]
ENSOMYG00000035234	grtp1a	1.78787	0.00849074	UP	growth hormone regulated TBC protein 1a [Source:ZFIN;Acc:ZDB-GENE-040426-2733]
ENSOMYG00000062833	si:dkeyp-72e1.9	1.77827	0.00505384	UP	si:dkeyp-72e1.9 [Source:ZFIN;Acc:ZDB-GENE-120215-89]
ENSOMYG00000010903	acsbg2	1.77692	0.00384868	UP	acyl-CoA synthetase bubblegum family member 2 [Source:ZFIN;Acc:ZDB-GENE-030131-7099]
ENSOMYG00000069831	manf	1.77638	0.0395433	UP	mesencephalic astrocyte-derived neurotrophic factor [Source:ZFIN;Acc:ZDB-GENE-060929-640]
ENSOMYG00000008832	mknk2a	1.77549	0.0313901	UP	MAPK interacting serine/threonine kinase 2a [Source:ZFIN;Acc:ZDB-GENE-030131-6099]
ENSOMYG00000019546	cilp2	1.76504	0.0279112	UP	cartilage intermediate layer protein 2 [Source:ZFIN;Acc:ZDB-GENE-050208-436]
ENSOMYG00000005667	slc43a1b	1.76324	0.00680591	UP	solute carrier family 43 member 1b [Source:ZFIN;Acc:ZDB-GENE-070209-173]
ENSOMYG00000016071	bzw2	1.75725	0.0358648	UP	basic leucine zipper and W2 domains 2 [Source:ZFIN;Acc:ZDB-GENE-040426-746]
ENSOMYG00000023975	eif2ak3	1.74802	0.00628241	UP	eukaryotic translation initiation factor 2-alpha kinase 3 [Source:ZFIN;Acc:ZDB-GENE-050414-2]
ENSOMYG00000070481	zfand5a	1.73604	0.00230611	UP	zinc finger, AN1-type domain 5a [Source:ZFIN;Acc:ZDB-GENE-040426-1979]
ENSOMYG00000049204	PPP2R2C	1.72341	0.010725	UP	protein phosphatase 2 regulatory subunit Bgamma [Source:HGNC Symbol;Acc:HGNC:9306]
ENSOMYG00000037936	zbtb16a	1.72245	0.0426075	UP	zinc finger and BTB domain containing 16a [Source:ZFIN;Acc:ZDB-GENE-030131-1989]
ENSOMYG00000045723	pcyt1ab	1.71438	4.16599e-06	UP	phosphate cytidylyltransferase 1A, choline b [Source:ZFIN;Acc:ZDB-GENE-050522-114]
ENSOMYG00000033281	nfatc1	1.69208	0.00090976	UP	nuclear factor of activated T cells 1 [Source:ZFIN;Acc:ZDB-GENE-060503-677]
ENSOMYG00000034782	tert	1.67611	0.0341223	UP	telomerase reverse transcriptase [Source:ZFIN;Acc:ZDB-GENE-080405-1]
ENSOMYG00000003989	zgc:153115	1.63674	0.00995026	UP	zgc:153115 [Source:ZFIN;Acc:ZDB-GENE-061013-418]
ENSOMYG00000005625	mfsd2ab	1.63575	0.0257936	UP	MFSD2 lysolipid transporter A, lysophospholipid b [Source:ZFIN;Acc:ZDB-GENE-040801-89]
ENSOMYG00000000078	mrap2a	1.62832	0.0219344	UP	melanocortin 2 receptor accessory protein 2a [Source:ZFIN;Acc:ZDB-GENE-100729-3]
ENSOMYG00000044651	USP53	1.6251	0.0100636	UP	ubiquitin specific peptidase 53 [Source:HGNC Symbol;Acc:HGNC:29255]
ENSOMYG00000028327	chac1	1.61417	0.010973	UP	ChaC, cation transport regulator homolog 1 (E. coli) [Source:ZFIN;Acc:ZDB-GENE-030131-1957]
ENSOMYG00000038071	si:dkey-8l13.5	1.60654	0.00849844	UP	si:dkey-8l13.5 [Source:ZFIN;Acc:ZDB-GENE-141216-349]
ENSOMYG00000031215	grtp1a	1.60388	0.000434262	UP	growth hormone regulated TBC protein 1a [Source:ZFIN;Acc:ZDB-GENE-040426-2733]
ENSOMYG00000017399	JUNB	1.59688	0.0376917	UP	JunB proto-oncogene, AP-1 transcription factor subunit [Source:HGNC Symbol;Acc:HGNC:6205]
ENSOMYG00000058535	socs2	1.59405	0.0209651	UP	suppressor of cytokine signaling 2 [Source:ZFIN;Acc:ZDB-GENE-041210-171]
ENSOMYG00000037306	sdhaf3	1.58841	0.00168755	UP	succinate dehydrogenase complex assembly factor 3 [Source:ZFIN;Acc:ZDB-GENE-041010-94]
ENSOMYG00000043858	slc39a13	1.58082	0.0162597	UP	solute carrier family 39 member 13 [Source:ZFIN;Acc:ZDB-GENE-030616-17]
ENSOMYG00000031942	ddx5	1.57347	0.0139476	UP	DEAD (Asp-Glu-Ala-Asp) box helicase 5 [Source:ZFIN;Acc:ZDB-GENE-030131-925]
ENSOMYG00000024432	rnd3b	1.57064	0.0360689	UP	Rho family GTPase 3b [Source:ZFIN;Acc:ZDB-GENE-040718-331]
ENSOMYG00000028099	bag4	1.56758	0.022095	UP	BCL2 associated athanogene 4 [Source:ZFIN;Acc:ZDB-GENE-030131-5484]
ENSOMYG00000039018	napepld	1.56005	0.0373567	UP	N-acyl phosphatidylethanolamine phospholipase D [Source:ZFIN;Acc:ZDB-GENE-030131-3856]
ENSOMYG00000020922	nt5c2l1	1.55594	3.37344e-05	UP	5'-nucleotidase, cytosolic II, like 1 [Source:ZFIN;Acc:ZDB-GENE-031006-8]
ENSOMYG00000027040	RPE65	1.55367	0.0117185	UP	retinoid isomerohydrolase RPE65 [Source:HGNC Symbol;Acc:HGNC:10294]
ENSOMYG00000023821	napepld	1.55332	0.0444378	UP	N-acyl phosphatidylethanolamine phospholipase D [Source:ZFIN;Acc:ZDB-GENE-030131-3856]
ENSOMYG00000044657	gpr22a	1.54972	0.00407139	UP	G protein-coupled receptor 22a [Source:ZFIN;Acc:ZDB-GENE-041210-48]
ENSOMYG00000037334	arg2	1.52694	0.00684345	UP	arginase 2 [Source:ZFIN;Acc:ZDB-GENE-030131-1334]
ENSOMYG00000042598	sh3rf2	1.52342	0.0418242	UP	SH3 domain containing ring finger 2 [Source:ZFIN;Acc:ZDB-GENE-141212-301]
ENSOMYG00000030955	alg2	1.5201	0.0380697	UP	ALG2 alpha-1,3/1,6-mannosyltransferase [Source:ZFIN;Acc:ZDB-GENE-060502-2]
ENSOMYG00000041476	ndufaf4	1.51687	0.0242444	UP	NADH:ubiquinone oxidoreductase complex assembly factor 4 [Source:ZFIN;Acc:ZDB-GENE-060810-114]
ENSOMYG00000008788	mfsd13a	1.51326	0.00481709	UP	major facilitator superfamily domain containing 13A [Source:ZFIN;Acc:ZDB-GENE-041212-83]
ENSOMYG00000003084	ATP11A	1.50994	0.0115895	UP	ATPase phospholipid transporting 11A [Source:HGNC Symbol;Acc:HGNC:13552]
ENSOMYG00000046874	slc35e4	1.50837	0.0193011	UP	solute carrier family 35 member E4 [Source:ZFIN;Acc:ZDB-GENE-050417-407]
ENSOMYG00000021414	SLC39A5	1.50727	0.0451447	UP	solute carrier family 39 member 5 [Source:HGNC Symbol;Acc:HGNC:20502]
ENSOMYG00000016749	adam28	1.50638	0.0360811	UP	ADAM metallopeptidase domain 28 [Source:ZFIN;Acc:ZDB-GENE-060929-532]
ENSOMYG00000055945	kcnj8	1.50578	0.000202918	UP	potassium inwardly rectifying channel subfamily J member 8 [Source:ZFIN;Acc:ZDB-GENE-060308-1]
ENSOMYG00000021734	coq10a	1.50172	0.0010896	UP	coenzyme Q10A [Source:ZFIN;Acc:ZDB-GENE-090312-30]
ENSOMYG00000020178	CHRM5	1.50019	0.000218731	UP	cholinergic receptor muscarinic 5 [Source:HGNC Symbol;Acc:HGNC:1954]
ENSOMYG00000043160	znrf2a	1.49889	0.000170984	UP	zinc and ring finger 2a [Source:ZFIN;Acc:ZDB-GENE-070820-15]
ENSOMYG00000040575	tmem82	1.49514	0.0168471	UP	transmembrane protein 82 [Source:ZFIN;Acc:ZDB-GENE-131127-584]
ENSOMYG00000063206	ccn5	1.48878	0.00699692	UP	cellular communication network factor 5 [Source:ZFIN;Acc:ZDB-GENE-060223-1]
ENSOMYG00000032260	larp6a	1.48484	0.0362889	UP	La ribonucleoprotein 6, translational regulator a [Source:ZFIN;Acc:ZDB-GENE-030131-6403]
ENSOMYG00000025960	plod1a	1.48391	0.00745044	UP	procollagen-lysine, 2-oxoglutarate 5-dioxygenase 1a [Source:ZFIN;Acc:ZDB-GENE-030131-3165]
ENSOMYG00000012288	ttc7a	1.47149	0.0374571	UP	tetratricopeptide repeat domain 7A [Source:ZFIN;Acc:ZDB-GENE-010319-27]
ENSOMYG00000017016	cdkn1ba	1.46999	1.94568e-10	UP	cyclin dependent kinase inhibitor 1Ba [Source:ZFIN;Acc:ZDB-GENE-040812-3]
ENSOMYG00000037340	si:dkey-181f22.4	1.46431	0.00813285	UP	adhesion G protein-coupled receptor G1 [Source:ZFIN;Acc:ZDB-GENE-030131-3671]
ENSOMYG00000044871	MFSD9	1.46137	0.0329423	UP	major facilitator superfamily domain containing 9 [Source:HGNC Symbol;Acc:HGNC:28158]
ENSOMYG00000034472	tmem39a	1.44715	0.00467599	UP	transmembrane protein 39A [Source:ZFIN;Acc:ZDB-GENE-030131-1928]
ENSOMYG00000041794	serpine1	1.44503	1.34302e-05	UP	serpin peptidase inhibitor, clade E (nexin, plasminogen activator inhibitor type 1), member 1 [Source:ZFIN;Acc:ZDB-GENE-070912-60]
ENSOMYG00000040771	irs2a	1.43904	0.0343878	UP	insulin receptor substrate 2a [Source:ZFIN;Acc:ZDB-GENE-040426-975]
ENSOMYG00000022652	slc1a5	1.43657	0.00163618	UP	solute carrier family 1 member 5 [Source:ZFIN;Acc:ZDB-GENE-070501-4]
ENSOMYG00000043585	etfa	1.42854	0.0473094	UP	electron transfer flavoprotein subunit alpha [Source:ZFIN;Acc:ZDB-GENE-030131-4449]
ENSOMYG00000017847	KCNN1	1.42392	0.0233004	UP	potassium calcium-activated channel subfamily N member 1 [Source:HGNC Symbol;Acc:HGNC:6290]
ENSOMYG00000012434	CREM	1.41616	1.17272e-07	UP	cAMP responsive element modulator [Source:HGNC Symbol;Acc:HGNC:2352]
ENSOMYG00000074282	mdc1	1.40993	0.0182302	UP	mediator of DNA damage checkpoint 1 [Source:ZFIN;Acc:ZDB-GENE-060810-185]
ENSOMYG00000025071	OSBPL10	1.40662	0.0316039	UP	oxysterol binding protein like 10 [Source:HGNC Symbol;Acc:HGNC:16395]
ENSOMYG00000042667	cebpd	1.40353	1.32382e-06	UP	CCAAT enhancer binding protein delta [Source:ZFIN;Acc:ZDB-GENE-020111-4]
ENSOMYG00000000538	bnip3	1.39848	0.034899	UP	BCL2 interacting protein 3 [Source:ZFIN;Acc:ZDB-GENE-030131-8060]
ENSOMYG00000029048	slc1a5	1.39736	0.000155266	UP	solute carrier family 1 member 5 [Source:ZFIN;Acc:ZDB-GENE-070501-4]
ENSOMYG00000022552	znf395a	1.39724	6.04783e-08	UP	zinc finger protein 395a [Source:ZFIN;Acc:ZDB-GENE-061215-52]
ENSOMYG00000035940	kiaa0513	1.39324	0.000349142	UP	KIAA0513 [Source:ZFIN;Acc:ZDB-GENE-040704-34]
ENSOMYG00000022190	ZBTB21	1.39181	0.0328135	UP	zinc finger and BTB domain containing 21 [Source:HGNC Symbol;Acc:HGNC:13083]
ENSOMYG00000005344	slc1a3a	1.38906	0.00409845	UP	solute carrier family 1 member 3a [Source:ZFIN;Acc:ZDB-GENE-030131-2159]
ENSOMYG00000058991	gatm	1.38412	0.0234653	UP	glycine amidinotransferase (L-arginine:glycine amidinotransferase) [Source:ZFIN;Acc:ZDB-GENE-021015-1]
ENSOMYG00000008702	trib3	1.38312	0.0262921	UP	tribbles pseudokinase 3 [Source:ZFIN;Acc:ZDB-GENE-040426-2609]
ENSOMYG00000039960	colgalt1a	1.37985	0.0292146	UP	collagen beta(1-O)galactosyltransferase 1 [Source:ZFIN;Acc:ZDB-GENE-070720-6]
ENSOMYG00000042957	ccr12a	1.37916	0.0468286	UP	chemokine (C-C motif) receptor 12a [Source:ZFIN;Acc:ZDB-GENE-060503-97]
ENSOMYG00000072716	rcn1	1.37679	0.0285931	UP	reticulocalbin 1, EF-hand calcium binding domain [Source:ZFIN;Acc:ZDB-GENE-080225-33]
ENSOMYG00000010958	zdhhc3b	1.37488	0.0285462	UP	zinc finger DHHC-type palmitoyltransferase 3b [Source:ZFIN;Acc:ZDB-GENE-061110-19]
ENSOMYG00000014198	mindy3	1.36738	0.0262046	UP	MINDY lysine 48 deubiquitinase 3 [Source:ZFIN;Acc:ZDB-GENE-061110-13]
ENSOMYG00000031280	crebrf	1.36723	0.030953	UP	creb3 regulatory factor [Source:ZFIN;Acc:ZDB-GENE-120203-3]
ENSOMYG00000017431	mrpl45	1.36629	0.0237073	UP	mitochondrial ribosomal protein L45 [Source:ZFIN;Acc:ZDB-GENE-040426-1041]
ENSOMYG00000038152	ero1b	1.36544	0.0384839	UP	endoplasmic reticulum oxidoreductase 1 beta [Source:ZFIN;Acc:ZDB-GENE-060929-744]
ENSOMYG00000007004	amotl2b	1.36177	0.0182145	UP	angiomotin like 2b [Source:ZFIN;Acc:ZDB-GENE-061103-307]
ENSOMYG00000005665	scn4bb	1.35757	0.0333979	UP	sodium channel, voltage-gated, type IV, beta b [Source:ZFIN;Acc:ZDB-GENE-031116-71]
ENSOMYG00000043353	socs2	1.35422	0.0181303	UP	suppressor of cytokine signaling 2 [Source:ZFIN;Acc:ZDB-GENE-041210-171]
ENSOMYG00000038302	uck2a	1.35364	0.0226121	UP	uridine-cytidine kinase 2a [Source:ZFIN;Acc:ZDB-GENE-030131-7158]
ENSOMYG00000055314	nbeaa	1.3516	0.0101549	UP	neurobeachin a [Source:ZFIN;Acc:ZDB-GENE-050320-68]
ENSOMYG00000020319	dennd11	1.34642	0.00293991	UP	DENN domain containing 11 [Source:ZFIN;Acc:ZDB-GENE-050419-80]
ENSOMYG00000014891	brdt	1.34523	0.0348007	UP	bromodomain, testis-specific [Source:ZFIN;Acc:ZDB-GENE-030131-5928]
ENSOMYG00000073687	gtpbp1	1.33024	0.00784222	UP	GTP binding protein 1 [Source:ZFIN;Acc:ZDB-GENE-030909-12]
ENSOMYG00000007708	slc35b1	1.32811	0.0199157	UP	solute carrier family 35 member B1 [Source:ZFIN;Acc:ZDB-GENE-040912-148]
ENSOMYG00000068149	frzb	1.32801	0.0204643	UP	frizzled related protein [Source:ZFIN;Acc:ZDB-GENE-990715-1]
ENSOMYG00000017229	SLC26A2	1.32742	0.00108013	UP	solute carrier family 26 member 2 [Source:HGNC Symbol;Acc:HGNC:10994]
ENSOMYG00000077883	cabp4	1.32649	0.0466092	UP	calcium binding protein 4 [Source:ZFIN;Acc:ZDB-GENE-081104-291]
ENSOMYG00000006549	olfml2bb	1.32642	0.0105124	UP	olfactomedin-like 2Bb [Source:ZFIN;Acc:ZDB-GENE-070912-266]
ENSOMYG00000011845	alg1	1.32548	0.0115527	UP	ALG1 chitobiosyldiphosphodolichol beta-mannosyltransferase [Source:ZFIN;Acc:ZDB-GENE-030131-6093]
ENSOMYG00000064037	batf	1.32527	0.0225276	UP	basic leucine zipper transcription factor, ATF-like [Source:ZFIN;Acc:ZDB-GENE-041014-291]
ENSOMYG00000031158	gadd45ga	1.32252	0.0148948	UP	growth arrest and DNA-damage-inducible, gamma a [Source:ZFIN;Acc:ZDB-GENE-040426-1882]
ENSOMYG00000034881	SLC2A13	1.31778	0.00407252	UP	solute carrier family 2 member 13 [Source:HGNC Symbol;Acc:HGNC:15956]
ENSOMYG00000015432	irs2b	1.31646	0.0360091	UP	insulin receptor substrate 2b [Source:ZFIN;Acc:ZDB-GENE-081104-462]
ENSOMYG00000042161	ormdl3	1.31479	0.0448652	UP	ORMDL sphingolipid biosynthesis regulator 3 [Source:ZFIN;Acc:ZDB-GENE-041010-190]
ENSOMYG00000034345	tmem39a	1.3077	0.0126655	UP	transmembrane protein 39A [Source:ZFIN;Acc:ZDB-GENE-030131-1928]
ENSOMYG00000025752	slc3a2b	1.30686	0.00424483	UP	solute carrier family 3 member 2b [Source:ZFIN;Acc:ZDB-GENE-040122-2]
ENSOMYG00000026296	bin2a	1.3023	0.0402093	UP	bridging integrator 2a [Source:ZFIN;Acc:ZDB-GENE-041114-126]
ENSOMYG00000026927	pgm5	1.30018	0.01947	UP	phosphoglucomutase 5 [Source:ZFIN;Acc:ZDB-GENE-060503-838]
ENSOMYG00000016935	SLC16A6	1.29605	0.0275994	UP	solute carrier family 16 member 6 [Source:HGNC Symbol;Acc:HGNC:10927]
ENSOMYG00000026514	zgc:165604	1.2951	0.0405527	UP	zgc:165604 [Source:ZFIN;Acc:ZDB-GENE-070615-34]
ENSOMYG00000063284	ikzf4	1.29033	0.000925888	UP	IKAROS family zinc finger 4 [Source:ZFIN;Acc:ZDB-GENE-180319-1]
ENSOMYG00000021611	sarm1	1.2878	0.0013886	UP	sterile alpha and TIR motif containing 1 [Source:ZFIN;Acc:ZDB-GENE-040219-1]
ENSOMYG00000008424	bcl2l1	1.2818	0.0480694	UP	BCL2 like 1 [Source:ZFIN;Acc:ZDB-GENE-010730-1]
ENSOMYG00000007073	pdcd4b	1.27425	0.0421951	UP	programmed cell death 4b [Source:ZFIN;Acc:ZDB-GENE-030131-9847]
ENSOMYG00000002596	serpine1	1.26648	0.023184	UP	serpin peptidase inhibitor, clade E (nexin, plasminogen activator inhibitor type 1), member 1 [Source:ZFIN;Acc:ZDB-GENE-070912-60]
ENSOMYG00000051025	dennd4a	1.26153	0.0434329	UP	DENN/MADD domain containing 4A [Source:ZFIN;Acc:ZDB-GENE-060503-285]
ENSOMYG00000016119	crebrf	1.24353	0.0288033	UP	creb3 regulatory factor [Source:ZFIN;Acc:ZDB-GENE-120203-3]
ENSOMYG00000009390	pole4	1.23982	0.0319179	UP	polymerase (DNA-directed), epsilon 4, accessory subunit [Source:ZFIN;Acc:ZDB-GENE-050522-309]
ENSOMYG00000028816	isg20	1.23802	0.0149121	UP	interferon stimulated exonuclease gene [Source:ZFIN;Acc:ZDB-GENE-100422-17]
ENSOMYG00000026399	grik5	1.23113	0.00198136	UP	glutamate receptor, ionotropic, kainate 5 [Source:ZFIN;Acc:ZDB-GENE-070821-6]
ENSOMYG00000042085	lrrc8da	1.23031	0.0335636	UP	leucine rich repeat containing 8 VRAC subunit Da [Source:ZFIN;Acc:ZDB-GENE-061009-26]
ENSOMYG00000009912	pdcd4b	1.22957	0.0275746	UP	programmed cell death 4b [Source:ZFIN;Acc:ZDB-GENE-030131-9847]
ENSOMYG00000041524	creb3l2	1.22663	0.00723608	UP	cAMP responsive element binding protein 3-like 2 [Source:ZFIN;Acc:ZDB-GENE-070112-1542]
ENSOMYG00000039614	KIAA0319L	1.22586	0.00374802	UP	KIAA0319 like [Source:HGNC Symbol;Acc:HGNC:30071]
ENSOMYG00000038388	pdxp	1.22488	0.0145914	UP	pyridoxal (pyridoxine, vitamin B6) phosphatase [Source:ZFIN;Acc:ZDB-GENE-080723-69]
ENSOMYG00000020926	zgc:153018	1.22456	0.00105445	UP	zgc:153018 [Source:ZFIN;Acc:ZDB-GENE-060929-752]
ENSOMYG00000029811	jdp2b	1.22177	0.030591	UP	Jun dimerization protein 2b [Source:ZFIN;Acc:ZDB-GENE-040718-197]
ENSOMYG00000046983	rgcc	1.22143	0.00060636	UP	regulator of cell cycle [Source:ZFIN;Acc:ZDB-GENE-040704-31]
ENSOMYG00000029374	odf3l2a	1.21913	0.00478766	UP	outer dense fiber of sperm tails 3-like 2a [Source:ZFIN;Acc:ZDB-GENE-050417-380]
ENSOMYG00000017134	ERO1B	1.21525	0.0101371	UP	endoplasmic reticulum oxidoreductase 1 beta [Source:HGNC Symbol;Acc:HGNC:14355]
ENSOMYG00000019561	noxo1a	1.21388	0.0226679	UP	NADPH oxidase organizer 1a [Source:ZFIN;Acc:ZDB-GENE-030131-9700]
ENSOMYG00000030043	s1pr1	1.21173	0.0169263	UP	sphingosine-1-phosphate receptor 1 [Source:ZFIN;Acc:ZDB-GENE-001228-2]
ENSOMYG00000012361	rgmb	1.21067	0.0280609	UP	repulsive guidance molecule BMP co-receptor b [Source:ZFIN;Acc:ZDB-GENE-040527-2]
ENSOMYG00000039584	nfkbiab	1.20984	7.46575e-06	UP	nuclear factor of kappa light polypeptide gene enhancer in B-cells inhibitor, alpha b [Source:ZFIN;Acc:ZDB-GENE-030131-1819]
ENSOMYG00000030326	AMHR2	1.20895	0.0339097	UP	anti-Mullerian hormone receptor type 2 [Source:HGNC Symbol;Acc:HGNC:465]
ENSOMYG00000036466	tefb	1.20789	0.0338284	UP	TEF transcription factor, PAR bZIP family member b [Source:ZFIN;Acc:ZDB-GENE-050522-224]
ENSOMYG00000006681	slc25a29	1.20742	0.00667119	UP	solute carrier family 25 member 29 [Source:ZFIN;Acc:ZDB-GENE-050913-70]
ENSOMYG00000074461	fbxo32	1.20735	0.0277725	UP	F-box protein 32 [Source:ZFIN;Acc:ZDB-GENE-040426-1040]
ENSOMYG00000031832	ADM2	1.2032	0.036202	UP	adrenomedullin 2 [Source:HGNC Symbol;Acc:HGNC:28898]
ENSOMYG00000036643	nox1	1.20051	0.00563568	UP	NADPH oxidase 1 [Source:ZFIN;Acc:ZDB-GENE-070404-1]
ENSOMYG00000007637	dhdds	1.19686	0.0143736	UP	dehydrodolichyl diphosphate synthase [Source:ZFIN;Acc:ZDB-GENE-040426-2236]
ENSOMYG00000011505	trpm4b3	1.19585	0.0497736	UP	transient receptor potential cation channel, subfamily M, member 4b, transient receptor potential cation channel, subfamily M, member 4b, tandem duplicate 2 [Source:ZFIN;Acc:ZDB-GENE-061214-2]
ENSOMYG00000027369	arid3b	1.19569	0.00328766	UP	AT-rich interactive domain 3B [Source:ZFIN;Acc:ZDB-GENE-070209-182]
ENSOMYG00000063146	snx30	1.19303	0.00748289	UP	sorting nexin family member 30 [Source:ZFIN;Acc:ZDB-GENE-050417-330]
ENSOMYG00000037330	papss1	1.1883	7.327e-05	UP	3'-phosphoadenosine 5'-phosphosulfate synthase 1 [Source:ZFIN;Acc:ZDB-GENE-080721-5]
ENSOMYG00000018546	lgi1b	1.18375	0.0447057	UP	leucine-rich, glioma inactivated 1b [Source:ZFIN;Acc:ZDB-GENE-060217-1]
ENSOMYG00000044241	gcnt7	1.18124	0.0316067	UP	glucosaminyl (N-acetyl) transferase family member 7 [Source:ZFIN;Acc:ZDB-GENE-120919-3]
ENSOMYG00000031594	zgc:171566	1.1778	0.0178869	UP	zgc:171566 [Source:ZFIN;Acc:ZDB-GENE-050309-193]
ENSOMYG00000005917	tanc1a	1.17658	0.0014017	UP	tetratricopeptide repeat, ankyrin repeat and coiled-coil containing 1a [Source:ZFIN;Acc:ZDB-GENE-130530-819]
ENSOMYG00000019087	nupr1b	1.1751	0.0226066	UP	nuclear protein 1b [Source:ZFIN;Acc:ZDB-GENE-030131-4653]
ENSOMYG00000040019	srpra	1.16576	0.0265618	UP	SRP receptor subunit alpha [Source:ZFIN;Acc:ZDB-GENE-030219-11]
ENSOMYG00000046270	CREM	1.16205	0.00124085	UP	cAMP responsive element modulator [Source:HGNC Symbol;Acc:HGNC:2352]
ENSOMYG00000018928	zgc:109986	1.16065	0.00914163	UP	zgc:109986 [Source:ZFIN;Acc:ZDB-GENE-050522-136]
ENSOMYG00000016793	myd88	1.15348	0.0393736	UP	MYD88 innate immune signal transduction adaptor [Source:ZFIN;Acc:ZDB-GENE-040219-3]
ENSOMYG00000035244	SLC17A9	1.15054	0.0425664	UP	solute carrier family 17 member 9 [Source:HGNC Symbol;Acc:HGNC:16192]
ENSOMYG00000021502	slc38a3b	1.14479	0.00310163	UP	solute carrier family 38 member 3b [Source:ZFIN;Acc:ZDB-GENE-121120-3]
ENSOMYG00000031583	rbm39b	1.1432	0.0168741	UP	RNA binding motif protein 39b [Source:ZFIN;Acc:ZDB-GENE-050327-97]
ENSOMYG00000008207	myoz3a	1.1422	0.00350004	UP	myozenin 3a [Source:ZFIN;Acc:ZDB-GENE-111012-4]
ENSOMYG00000033736	zgc:153675	1.13907	0.044874	UP	zgc:153675 [Source:ZFIN;Acc:ZDB-GENE-061013-567]
ENSOMYG00000046513	stx18	1.13781	0.0429496	UP	syntaxin 18 [Source:ZFIN;Acc:ZDB-GENE-050522-397]
ENSOMYG00000045223	GCN1	1.13251	0.0488806	UP	GCN1 activator of EIF2AK4 [Source:HGNC Symbol;Acc:HGNC:4199]
ENSOMYG00000044084	ccdc103	1.12822	0.0264641	UP	coiled-coil domain containing 103 [Source:ZFIN;Acc:ZDB-GENE-040718-253]
ENSOMYG00000013854	f13a1a.1	1.12523	0.00515111	UP	coagulation factor XIII, A1 polypeptide a, tandem duplicate 1 [Source:ZFIN;Acc:ZDB-GENE-060929-1250]
ENSOMYG00000036826	ABHD2	1.12408	0.00179702	UP	abhydrolase domain containing 2, acylglycerol lipase [Source:HGNC Symbol;Acc:HGNC:18717]
ENSOMYG00000023514	mapre2	1.12075	0.0139796	UP	microtubule-associated protein, RP/EB family, member 2 [Source:ZFIN;Acc:ZDB-GENE-071004-41]
ENSOMYG00000067017	mafk	1.11958	0.0166831	UP	v-maf avian musculoaponeurotic fibrosarcoma oncogene homolog K [Source:ZFIN;Acc:ZDB-GENE-040624-9]
ENSOMYG00000018727	YKT6	1.1141	6.85937e-05	UP	YKT6 v-SNARE homolog [Source:HGNC Symbol;Acc:HGNC:16959]
ENSOMYG00000043033	kcnk1b	1.11401	0.00644429	UP	potassium channel, subfamily K, member 1b [Source:ZFIN;Acc:ZDB-GENE-090312-78]
ENSOMYG00000035628	TFB1M	1.11089	0.0184646	UP	transcription factor B1, mitochondrial [Source:HGNC Symbol;Acc:HGNC:17037]
ENSOMYG00000045181	npas2	1.10964	0.0106861	UP	neuronal PAS domain protein 2 [Source:ZFIN;Acc:ZDB-GENE-030408-3]
ENSOMYG00000004365	MCMDC2	1.1031	0.0396986	UP	minichromosome maintenance domain containing 2 [Source:HGNC Symbol;Acc:HGNC:26368]
ENSOMYG00000030162	dnajc3b	1.1025	0.0294625	UP	DnaJ (Hsp40) homolog, subfamily C, member 3b [Source:ZFIN;Acc:ZDB-GENE-000831-4]
ENSOMYG00000002002	ptk6b	1.10113	0.0457259	UP	PTK6 protein tyrosine kinase 6b [Source:ZFIN;Acc:ZDB-GENE-060929-1150]
ENSOMYG00000017703	glut1a	1.09798	0.000786666	UP	solute carrier family 2 member 1b [Source:ZFIN;Acc:ZDB-GENE-090915-1]
ENSOMYG00000000886	JUND	1.09612	0.0328893	UP	JunD proto-oncogene, AP-1 transcription factor subunit [Source:HGNC Symbol;Acc:HGNC:6206]
ENSOMYG00000000872	PGPEP1	1.09381	0.00228716	UP	pyroglutamyl-peptidase I [Source:HGNC Symbol;Acc:HGNC:13568]
ENSOMYG00000058434	ribc2	1.0915	0.0125246	UP	RIB43A domain with coiled-coils 2 [Source:ZFIN;Acc:ZDB-GENE-050411-27]
ENSOMYG00000065779	foxo1a	1.0885	0.00228721	UP	forkhead box O1 a [Source:ZFIN;Acc:ZDB-GENE-061013-59]
ENSOMYG00000019438	baiap2l1b	1.08845	0.0103337	UP	BAR/IMD domain containing adaptor protein 2 like 1b [Source:ZFIN;Acc:ZDB-GENE-050417-371]
ENSOMYG00000041743	ccser2b	1.08673	0.0114293	UP	coiled-coil serine-rich protein 2b [Source:ZFIN;Acc:ZDB-GENE-121214-220]
ENSOMYG00000065610	osbpl10b	1.08606	0.00114202	UP	oxysterol binding protein-like 10b [Source:ZFIN;Acc:ZDB-GENE-081002-4]
ENSOMYG00000028806	pdia8	1.08271	0.0375812	UP	protein disulfide isomerase family A, member 8 [Source:ZFIN;Acc:ZDB-GENE-040801-20]
ENSOMYG00000003603	THNSL1	1.08087	0.0220596	UP	threonine synthase like 1 [Source:HGNC Symbol;Acc:HGNC:26160]
ENSOMYG00000021695	zgc:114130	1.08003	0.0360754	UP	zgc:114130 [Source:ZFIN;Acc:ZDB-GENE-050913-48]
ENSOMYG00000015429	grinaa	1.07874	0.0127756	UP	glutamate receptor, ionotropic, N-methyl D-aspartate-associated protein 1a (glutamate binding) [Source:ZFIN;Acc:ZDB-GENE-060616-231]
ENSOMYG00000023544	cebpd	1.07617	0.00199149	UP	CCAAT enhancer binding protein delta [Source:ZFIN;Acc:ZDB-GENE-020111-4]
ENSOMYG00000060194	klf13	1.07464	0.00396878	UP	Kruppel like factor 13 [Source:ZFIN;Acc:ZDB-GENE-060929-1274]
ENSOMYG00000054802	tm9sf2	1.07324	7.70938e-05	UP	transmembrane 9 superfamily member 2 [Source:ZFIN;Acc:ZDB-GENE-030131-6302]
ENSOMYG00000062182	ACKR3	1.07027	0.01051	UP	atypical chemokine receptor 3 [Source:HGNC Symbol;Acc:HGNC:23692]
ENSOMYG00000020744	vegfab	1.07017	4.99668e-05	UP	vascular endothelial growth factor Ab [Source:ZFIN;Acc:ZDB-GENE-030131-4605]
ENSOMYG00000027159	dph3	1.06515	0.0059497	UP	diphthamide biosynthesis 3 [Source:ZFIN;Acc:ZDB-GENE-050522-545]
ENSOMYG00000045134	ssh2b	1.0605	0.0413656	UP	slingshot protein phosphatase 2b [Source:ZFIN;Acc:ZDB-GENE-081205-4]
ENSOMYG00000053118	mecp2	1.05925	0.00486705	UP	methyl CpG binding protein 2 [Source:ZFIN;Acc:ZDB-GENE-030131-7190]
ENSOMYG00000003507	SRP72	1.05784	0.034952	UP	signal recognition particle 72 [Source:HGNC Symbol;Acc:HGNC:11303]
ENSOMYG00000028948	ift22	1.05609	0.0140822	UP	intraflagellar transport 22 homolog (Chlamydomonas) [Source:ZFIN;Acc:ZDB-GENE-050417-439]
ENSOMYG00000063751	dnajb9a	1.05175	0.0406908	UP	DnaJ heat shock protein family (Hsp40) member B9a [Source:ZFIN;Acc:ZDB-GENE-050626-115]
ENSOMYG00000000878	rab11al	1.04914	0.0352505	UP	RAB11a, member RAS oncogene family, like [Source:ZFIN;Acc:ZDB-GENE-031118-188]
ENSOMYG00000032735	rcc1l	1.04904	0.0156316	UP	RCC1 like [Source:ZFIN;Acc:ZDB-GENE-060526-370]
ENSOMYG00000018957	cox7a2b	1.04894	0.0180201	UP	cytochrome c oxidase subunit 7A2b [Source:ZFIN;Acc:ZDB-GENE-130514-2]
ENSOMYG00000014626	map3k14a	1.04765	0.0153814	UP	mitogen-activated protein kinase kinase kinase 14a [Source:ZFIN;Acc:ZDB-GENE-120215-80]
ENSOMYG00000074172	nrn1a	1.04706	0.0259462	UP	neuritin 1a [Source:ZFIN;Acc:ZDB-GENE-040718-212]
ENSOMYG00000047299	nfkbiab	1.04516	1.97217e-05	UP	nuclear factor of kappa light polypeptide gene enhancer in B-cells inhibitor, alpha b [Source:ZFIN;Acc:ZDB-GENE-030131-1819]
ENSOMYG00000043955	pparda	1.044	0.0192675	UP	peroxisome proliferator-activated receptor delta a [Source:ZFIN;Acc:ZDB-GENE-990415-212]
ENSOMYG00000044727	CCN2	1.04379	0.00112814	UP	cellular communication network factor 2 [Source:HGNC Symbol;Acc:HGNC:2500]
ENSOMYG00000057861	mmp9	1.04195	0.0146024	UP	matrix metallopeptidase 9 [Source:ZFIN;Acc:ZDB-GENE-040426-2132]
ENSOMYG00000022630	egln2	1.04075	0.000972701	UP	egl-9 family hypoxia-inducible factor 2 [Source:ZFIN;Acc:ZDB-GENE-060503-757]
ENSOMYG00000026373	podxl	1.03632	0.010023	UP	podocalyxin-like [Source:ZFIN;Acc:ZDB-GENE-030131-2805]
ENSOMYG00000004208	rab11al	1.03598	0.0488446	UP	RAB11a, member RAS oncogene family, like [Source:ZFIN;Acc:ZDB-GENE-031118-188]
ENSOMYG00000031725	mymk	1.0346	0.0277267	UP	myomaker, myoblast fusion factor [Source:ZFIN;Acc:ZDB-GENE-040625-66]
ENSOMYG00000029080	golga4	1.0337	0.0294108	UP	golgin A4 [Source:ZFIN;Acc:ZDB-GENE-050208-275]
ENSOMYG00000011119	camlg	1.03153	0.010501	UP	calcium modulating ligand [Source:ZFIN;Acc:ZDB-GENE-040426-2407]
ENSOMYG00000012689	dgat1a	1.0302	0.0067933	UP	diacylglycerol O-acyltransferase 1a [Source:ZFIN;Acc:ZDB-GENE-030131-4600]
ENSOMYG00000009486	mtmr7b	1.02814	0.0183614	UP	myotubularin related protein 7b [Source:ZFIN;Acc:ZDB-GENE-050913-66]
ENSOMYG00000012745	creb5a	1.02783	0.0499419	UP	cAMP responsive element binding protein 5a [Source:ZFIN;Acc:ZDB-GENE-120827-2]
ENSOMYG00000022716	ccnj	1.02752	0.00710304	UP	cyclin J [Source:ZFIN;Acc:ZDB-GENE-100721-4]
ENSOMYG00000028675	fbxl3a	1.02277	0.00379244	UP	F-box and leucine-rich repeat protein 3a [Source:ZFIN;Acc:ZDB-GENE-030912-5]
ENSOMYG00000020155	hgfa	1.01621	0.0306859	UP	hepatocyte growth factor a [Source:ZFIN;Acc:ZDB-GENE-041014-2]
ENSOMYG00000033734	eif3jb	1.01299	0.0381746	UP	eukaryotic translation initiation factor 3, subunit Jb [Source:ZFIN;Acc:ZDB-GENE-040426-2900]
ENSOMYG00000066296	cdc25d	1.01289	0.00170896	UP	cell division cycle 25 homolog d [Source:ZFIN;Acc:ZDB-GENE-090313-74]
ENSOMYG00000041790	slc33a1	1.012	0.000734346	UP	solute carrier family 33 member 1 [Source:ZFIN;Acc:ZDB-GENE-040426-1241]
ENSOMYG00000033838	ppp1r15b	1.00799	0.0366844	UP	protein phosphatase 1, regulatory subunit 15B [Source:ZFIN;Acc:ZDB-GENE-030829-40]
ENSOMYG00000028152	CCSER1	1.00735	0.0383957	UP	coiled-coil serine rich protein 1 [Source:HGNC Symbol;Acc:HGNC:29349]
ENSOMYG00000007020	rab5ab	1.00317	0.00858231	UP	RAB5A, member RAS oncogene family, b [Source:ZFIN;Acc:ZDB-GENE-040122-3]
ENSOMYG00000001152	cep85l	1.00216	0.00105345	UP	centrosomal protein 85, like [Source:ZFIN;Acc:ZDB-GENE-041014-309]
ENSOMYG00000034166	CDK4	-1.00175	0.030593	DOWN	cyclin dependent kinase 4 [Source:HGNC Symbol;Acc:HGNC:1773]
ENSOMYG00000023105	pik3r6b	-1.0018	0.0148466	DOWN	phosphoinositide-3-kinase, regulatory subunit 6b [Source:ZFIN;Acc:ZDB-GENE-120524-1]
ENSOMYG00000016981	rftn2	-1.00281	0.0261847	DOWN	raftlin family member 2 [Source:ZFIN;Acc:ZDB-GENE-040426-2760]
ENSOMYG00000076210	parp12b	-1.0029	0.0334259	DOWN	poly (ADP-ribose) polymerase family, member 12b [Source:ZFIN;Acc:ZDB-GENE-030131-2617]
ENSOMYG00000008889	sclt1	-1.00599	0.0053788	DOWN	sodium channel and clathrin linker 1 [Source:ZFIN;Acc:ZDB-GENE-030131-3278]
ENSOMYG00000029096	SWAP70	-1.00641	0.0107782	DOWN	switching B cell complex subunit SWAP70 [Source:HGNC Symbol;Acc:HGNC:17070]
ENSOMYG00000013034	cenps	-1.01186	0.0141786	DOWN	centromere protein S [Source:ZFIN;Acc:ZDB-GENE-080723-52]
ENSOMYG00000052496	acss2l	-1.01506	0.00663537	DOWN	acyl-CoA synthetase short chain family member 2 like [Source:ZFIN;Acc:ZDB-GENE-130530-723]
ENSOMYG00000018245	adamts12	-1.01523	0.0126393	DOWN	ADAM metallopeptidase with thrombospondin type 1 motif, 12 [Source:ZFIN;Acc:ZDB-GENE-070705-471]
ENSOMYG00000016154	nsl1	-1.01561	0.00653054	DOWN	NSL1 component of MIS12 kinetochore complex [Source:ZFIN;Acc:ZDB-GENE-041014-362]
ENSOMYG00000004177	dusp22b	-1.01569	0.0236577	DOWN	dual specificity phosphatase 22b [Source:ZFIN;Acc:ZDB-GENE-050417-257]
ENSOMYG00000038542	smc4	-1.02026	0.0345519	DOWN	structural maintenance of chromosomes 4 [Source:ZFIN;Acc:ZDB-GENE-020419-21]
ENSOMYG00000071329	mad2l1	-1.02077	0.0353231	DOWN	MAD2 mitotic arrest deficient-like 1 (yeast) [Source:ZFIN;Acc:ZDB-GENE-030515-3]
ENSOMYG00000037833	pnpla3	-1.02308	0.0486764	DOWN	patatin-like phospholipase domain containing 3 [Source:ZFIN;Acc:ZDB-GENE-040718-27]
ENSOMYG00000013168	fzd7b	-1.02358	0.0399324	DOWN	frizzled class receptor 7b [Source:ZFIN;Acc:ZDB-GENE-990415-229]
ENSOMYG00000000432	dhcr24	-1.0241	1.38506e-06	DOWN	24-dehydrocholesterol reductase [Source:ZFIN;Acc:ZDB-GENE-041212-73]
ENSOMYG00000057769	FBXO43	-1.02643	0.0266433	DOWN	F-box protein 43 [Source:HGNC Symbol;Acc:HGNC:28521]
ENSOMYG00000016694	eif4e2	-1.02806	0.0222008	DOWN	eukaryotic translation initiation factor 4E family member 2 [Source:ZFIN;Acc:ZDB-GENE-050327-59]
ENSOMYG00000019528	SAMD11	-1.0294	0.00992295	DOWN	sterile alpha motif domain containing 11 [Source:HGNC Symbol;Acc:HGNC:28706]
ENSOMYG00000016671	pank1b	-1.02966	2.28049e-05	DOWN	pantothenate kinase 1b [Source:ZFIN;Acc:ZDB-GENE-070209-259]
ENSOMYG00000030222	ckap5	-1.02997	0.00601569	DOWN	cytoskeleton associated protein 5 [Source:ZFIN;Acc:ZDB-GENE-051120-174]
ENSOMYG00000012083	gch1	-1.03297	0.00762754	DOWN	GTP cyclohydrolase 1 [Source:ZFIN;Acc:ZDB-GENE-070720-5]
ENSOMYG00000009010	dnmt3ba	-1.03406	0.022603	DOWN	DNA (cytosine-5-)-methyltransferase 3 beta, duplicate a [Source:ZFIN;Acc:ZDB-GENE-050314-4]
ENSOMYG00000017535	zgc:158403	-1.03612	0.00995063	DOWN	zgc:158403 [Source:ZFIN;Acc:ZDB-GENE-061215-116]
ENSOMYG00000013156	si:dkey-240h12.4	-1.03706	0.00166595	DOWN	si:dkey-240h12.4 [Source:ZFIN;Acc:ZDB-GENE-070705-406]
ENSOMYG00000012221	mmp11a	-1.03722	0.0105222	DOWN	matrix metallopeptidase 11a [Source:ZFIN;Acc:ZDB-GENE-070817-3]
ENSOMYG00000013260	elovl8b	-1.04058	4.37304e-05	DOWN	ELOVL fatty acid elongase 8b [Source:ZFIN;Acc:ZDB-GENE-050522-453]
ENSOMYG00000043780	SGK2	-1.04146	0.0259111	DOWN	serum/glucocorticoid regulated kinase 2 [Source:HGNC Symbol;Acc:HGNC:13900]
ENSOMYG00000070393	robo2	-1.04374	0.0192147	DOWN	roundabout, axon guidance receptor, homolog 2 (Drosophila) [Source:ZFIN;Acc:ZDB-GENE-001019-1]
ENSOMYG00000022093	zgc:112496	-1.04409	0.0127111	DOWN	zgc:112496 [Source:ZFIN;Acc:ZDB-GENE-050320-25]
ENSOMYG00000041513	hmgb3a	-1.04432	0.00541812	DOWN	high mobility group box 3a [Source:ZFIN;Acc:ZDB-GENE-050428-1]
ENSOMYG00000016095	cant1a	-1.04477	0.00178349	DOWN	calcium activated nucleotidase 1a [Source:ZFIN;Acc:ZDB-GENE-040426-2441]
ENSOMYG00000074939	sfxn1	-1.04731	0.000142411	DOWN	sideroflexin 1 [Source:ZFIN;Acc:ZDB-GENE-040801-45]
ENSOMYG00000019878	fam222aa	-1.05001	0.00842881	DOWN	family with sequence similarity 222 member Aa [Source:ZFIN;Acc:ZDB-GENE-050309-42]
ENSOMYG00000004686	MND1	-1.05048	0.0477725	DOWN	meiotic nuclear divisions 1 [Source:HGNC Symbol;Acc:HGNC:24839]
ENSOMYG00000000662	si:ch211-1a19.3	-1.05419	0.0184849	DOWN	si:ch211-1a19.3 [Source:ZFIN;Acc:ZDB-GENE-141216-322]
ENSOMYG00000037440	si:dkey-6i22.5	-1.06135	0.0167105	DOWN	si:dkey-6i22.5 [Source:ZFIN;Acc:ZDB-GENE-050506-32]
ENSOMYG00000002634	ntd5	-1.06373	0.0254192	DOWN	ntl-dependent gene 5 [Source:ZFIN;Acc:ZDB-GENE-031030-7]
ENSOMYG00000016464	fzd7b	-1.06426	0.00114858	DOWN	frizzled class receptor 7b [Source:ZFIN;Acc:ZDB-GENE-990415-229]
ENSOMYG00000004457	anapc5	-1.06464	0.0039416	DOWN	anaphase promoting complex subunit 5 [Source:ZFIN;Acc:ZDB-GENE-030131-1574]
ENSOMYG00000010965	gadd45aa	-1.065	0.0299063	DOWN	growth arrest and DNA-damage-inducible, alpha, a [Source:ZFIN;Acc:ZDB-GENE-040426-1501]
ENSOMYG00000020060	tcf7	-1.06519	0.0303631	DOWN	transcription factor 7 [Source:ZFIN;Acc:ZDB-GENE-050222-4]
ENSOMYG00000066071	pnpla3	-1.06522	0.0352752	DOWN	patatin-like phospholipase domain containing 3 [Source:ZFIN;Acc:ZDB-GENE-040718-27]
ENSOMYG00000051938	ltc4s	-1.06527	0.0270086	DOWN	leukotriene C4 synthase [Source:ZFIN;Acc:ZDB-GENE-110411-32]
ENSOMYG00000000638	SLC25A32	-1.06665	0.00915543	DOWN	solute carrier family 25 member 32 [Source:HGNC Symbol;Acc:HGNC:29683]
ENSOMYG00000008806	CSF1R	-1.06735	0.00288101	DOWN	colony stimulating factor 1 receptor [Source:HGNC Symbol;Acc:HGNC:2433]
ENSOMYG00000040505	cdca8	-1.068	0.0269457	DOWN	cell division cycle associated 8 [Source:ZFIN;Acc:ZDB-GENE-041114-171]
ENSOMYG00000037561	etaa1a	-1.07496	0.0185313	DOWN	ETAA1 activator of ATR kinase a [Source:ZFIN;Acc:ZDB-GENE-080204-12]
ENSOMYG00000012054	MARCO	-1.07716	0.0119723	DOWN	macrophage receptor with collagenous structure [Source:HGNC Symbol;Acc:HGNC:6895]
ENSOMYG00000018236	ttc39a	-1.08003	0.0299051	DOWN	tetratricopeptide repeat domain 39A [Source:ZFIN;Acc:ZDB-GENE-091116-42]
ENSOMYG00000033077	plcd3a	-1.08198	0.00722434	DOWN	phospholipase C, delta 3a [Source:ZFIN;Acc:ZDB-GENE-070620-1]
ENSOMYG00000043127	tmem244	-1.08209	0.0316966	DOWN	transmembrane protein 244 [Source:ZFIN;Acc:ZDB-GENE-040724-54]
ENSOMYG00000013864	hmgcra	-1.08271	6.39822e-05	DOWN	3-hydroxy-3-methylglutaryl-CoA reductase a [Source:ZFIN;Acc:ZDB-GENE-040401-2]
ENSOMYG00000021966	agap2	-1.08435	0.00358524	DOWN	ArfGAP with GTPase domain, ankyrin repeat and PH domain 2 [Source:ZFIN;Acc:ZDB-GENE-061103-343]
ENSOMYG00000064984	gas2l3	-1.09231	0.0468952	DOWN	growth arrest-specific 2 like 3 [Source:ZFIN;Acc:ZDB-GENE-030131-2560]
ENSOMYG00000032849	dnph1	-1.09344	0.025782	DOWN	2'-deoxynucleoside 5'-phosphate N-hydrolase 1 [Source:ZFIN;Acc:ZDB-GENE-081107-5]
ENSOMYG00000041934	mtf2	-1.09492	0.0490333	DOWN	metal response element binding transcription factor 2 [Source:ZFIN;Acc:ZDB-GENE-060512-94]
ENSOMYG00000026510	rbp4	-1.09514	0.000485851	DOWN	retinol binding protein 4, plasma [Source:ZFIN;Acc:ZDB-GENE-000210-19]
ENSOMYG00000009573	HID1	-1.09521	0.0324135	DOWN	HID1 domain containing [Source:HGNC Symbol;Acc:HGNC:15736]
ENSOMYG00000036204	ciao1	-1.09694	0.0115487	DOWN	cytosolic iron-sulfur assembly component 1 [Source:ZFIN;Acc:ZDB-GENE-040426-839]
ENSOMYG00000016468	themis	-1.0988	0.0228908	DOWN	thymocyte selection associated [Source:ZFIN;Acc:ZDB-GENE-041008-160]
ENSOMYG00000038200	CTNNBL1	-1.09917	0.0372053	DOWN	catenin beta like 1 [Source:HGNC Symbol;Acc:HGNC:15879]
ENSOMYG00000037483	cenpi	-1.10313	0.0355888	DOWN	centromere protein I [Source:ZFIN;Acc:ZDB-GENE-060810-127]
ENSOMYG00000065420	prr11	-1.10783	0.0104565	DOWN	proline rich 11 [Source:ZFIN;Acc:ZDB-GENE-091118-97]
ENSOMYG00000009933	slc5a3a	-1.10804	0.0269681	DOWN	solute carrier family 5 member 3a [Source:ZFIN;Acc:ZDB-GENE-090312-3]
ENSOMYG00000035896	thoc3	-1.10893	0.0493702	DOWN	THO complex 3 [Source:ZFIN;Acc:ZDB-GENE-040808-14]
ENSOMYG00000010268	slc6a22.1	-1.1122	0.000632226	DOWN	solute carrier family 6 member 22, tandem duplicate 1 [Source:ZFIN;Acc:ZDB-GENE-030616-629]
ENSOMYG00000033066	dspb	-1.11239	0.00458096	DOWN	desmoplakin b [Source:ZFIN;Acc:ZDB-GENE-030131-1662]
ENSOMYG00000036415	m1ip1	-1.1129	0.0321571	DOWN	MID1 interacting protein 1, like [Source:ZFIN;Acc:ZDB-GENE-030131-1697]
ENSOMYG00000007441	tk1	-1.11468	0.000980655	DOWN	thymidine kinase 1, soluble [Source:ZFIN;Acc:ZDB-GENE-030131-5801]
ENSOMYG00000036763	nusap1	-1.11788	0.0121343	DOWN	nucleolar and spindle associated protein 1 [Source:ZFIN;Acc:ZDB-GENE-030827-5]
ENSOMYG00000045682	cenpf	-1.11818	0.0287361	DOWN	centromere protein F [Source:ZFIN;Acc:ZDB-GENE-041111-205]
ENSOMYG00000015280	nusap1	-1.11844	0.00338815	DOWN	nucleolar and spindle associated protein 1 [Source:ZFIN;Acc:ZDB-GENE-030827-5]
ENSOMYG00000038038	snai1b	-1.12082	0.0179092	DOWN	snail family zinc finger 1b [Source:ZFIN;Acc:ZDB-GENE-980526-514]
ENSOMYG00000008363	capgb	-1.12297	0.000439428	DOWN	capping protein (actin filament), gelsolin-like b [Source:ZFIN;Acc:ZDB-GENE-030131-8541]
ENSOMYG00000042914	zgc:86764	-1.12443	0.0396584	DOWN	zgc:86764 [Source:ZFIN;Acc:ZDB-GENE-040718-435]
ENSOMYG00000038875	sdsl	-1.12551	0.00290097	DOWN	serine dehydratase-like [Source:ZFIN;Acc:ZDB-GENE-131121-410]
ENSOMYG00000005215	slc52a3-1	-1.1311	0.00290531	DOWN	solute carrier family 52 member 3-1 [Source:ZFIN;Acc:ZDB-GENE-060421-4490]
ENSOMYG00000068467	znf362a	-1.13126	0.0265151	DOWN	zinc finger protein 362a [Source:ZFIN;Acc:ZDB-GENE-061103-547]
ENSOMYG00000041611	cenpn	-1.13316	0.0476233	DOWN	centromere protein N [Source:ZFIN;Acc:ZDB-GENE-030616-408]
ENSOMYG00000032614	nucks1a	-1.13574	0.00519434	DOWN	nuclear casein kinase and cyclin-dependent kinase substrate 1a [Source:ZFIN;Acc:ZDB-GENE-040912-175]
ENSOMYG00000013943	ppdpfa	-1.13891	0.039342	DOWN	pancreatic progenitor cell differentiation and proliferation factor a [Source:ZFIN;Acc:ZDB-GENE-030219-204]
ENSOMYG00000067363	ppp1r3b	-1.13899	0.00844684	DOWN	protein phosphatase 1, regulatory subunit 3B [Source:ZFIN;Acc:ZDB-GENE-030131-5496]
ENSOMYG00000069885	elovl6	-1.14078	0.0432552	DOWN	ELOVL fatty acid elongase 6 [Source:ZFIN;Acc:ZDB-GENE-030114-1]
ENSOMYG00000022859	S100P	-1.1482	0.0196373	DOWN	S100 calcium binding protein P [Source:HGNC Symbol;Acc:HGNC:10504]
ENSOMYG00000048455	fads2	-1.14997	2.26646e-09	DOWN	fatty acid desaturase 2 [Source:ZFIN;Acc:ZDB-GENE-011212-1]
ENSOMYG00000030223	orc1	-1.15056	0.0061967	DOWN	origin recognition complex, subunit 1 [Source:ZFIN;Acc:ZDB-GENE-030131-6960]
ENSOMYG00000065011	DUT	-1.15152	0.000891357	DOWN	deoxyuridine triphosphatase [Source:HGNC Symbol;Acc:HGNC:3078]
ENSOMYG00000012149	kif20ba	-1.15746	0.00676361	DOWN	kinesin family member 20Ba [Source:ZFIN;Acc:ZDB-GENE-041111-213]
ENSOMYG00000044822	map2k6	-1.15793	0.0210443	DOWN	mitogen-activated protein kinase kinase 6 [Source:ZFIN;Acc:ZDB-GENE-010202-3]
ENSOMYG00000006735	smo	-1.15864	0.0226179	DOWN	smoothened, frizzled class receptor [Source:ZFIN;Acc:ZDB-GENE-980526-89]
ENSOMYG00000018416	pbk	-1.16027	0.00210202	DOWN	PDZ binding kinase [Source:ZFIN;Acc:ZDB-GENE-030523-2]
ENSOMYG00000039655	raver1	-1.161	0.036005	DOWN	ribonucleoprotein, PTB-binding 1 [Source:ZFIN;Acc:ZDB-GENE-050522-99]
ENSOMYG00000023912	dram1	-1.16116	0.0107993	DOWN	DNA-damage regulated autophagy modulator 1 [Source:ZFIN;Acc:ZDB-GENE-041010-147]
ENSOMYG00000005467	cyp51	-1.16231	0.00245977	DOWN	cytochrome P450, family 51 [Source:ZFIN;Acc:ZDB-GENE-040625-2]
ENSOMYG00000011840	hmmr	-1.16299	0.00200792	DOWN	hyaluronan-mediated motility receptor (RHAMM) [Source:ZFIN;Acc:ZDB-GENE-030131-731]
ENSOMYG00000052693	chtf8	-1.16323	0.0399775	DOWN	CTF8, chromosome transmission fidelity factor 8 homolog (S. cerevisiae) [Source:ZFIN;Acc:ZDB-GENE-050419-148]
ENSOMYG00000042181	mcm4	-1.16703	0.000218877	DOWN	minichromosome maintenance complex component 4 [Source:ZFIN;Acc:ZDB-GENE-030131-9544]
ENSOMYG00000048087	KCNIP2	-1.16804	0.0156506	DOWN	potassium voltage-gated channel interacting protein 2 [Source:HGNC Symbol;Acc:HGNC:15522]
ENSOMYG00000076614	arhgap19	-1.17102	0.00278519	DOWN	Rho GTPase activating protein 19 [Source:ZFIN;Acc:ZDB-GENE-100922-157]
ENSOMYG00000022727	ACMSD	-1.17469	0.00618703	DOWN	aminocarboxymuconate semialdehyde decarboxylase [Source:HGNC Symbol;Acc:HGNC:19288]
ENSOMYG00000046797	mdkb	-1.17636	0.0145215	DOWN	midkine b [Source:ZFIN;Acc:ZDB-GENE-010131-6]
ENSOMYG00000047216	tcf7	-1.18049	0.0152249	DOWN	transcription factor 7 [Source:ZFIN;Acc:ZDB-GENE-050222-4]
ENSOMYG00000011988	wdhd1	-1.18274	0.0103173	DOWN	WD repeat and HMG-box DNA binding protein 1 [Source:ZFIN;Acc:ZDB-GENE-030131-1665]
ENSOMYG00000034463	anxa14	-1.18483	0.0287378	DOWN	annexin A14 [Source:ZFIN;Acc:ZDB-GENE-041010-152]
ENSOMYG00000000647	cdca3	-1.18572	0.000408779	DOWN	cell division cycle associated 3 [Source:ZFIN;Acc:ZDB-GENE-030804-13]
ENSOMYG00000034729	tesk1b	-1.20414	0.0177266	DOWN	testis associated actin remodelling kinase 1b [Source:ZFIN;Acc:ZDB-GENE-030131-7512]
ENSOMYG00000076271	kif20ba	-1.20425	0.0252988	DOWN	kinesin family member 20Ba [Source:ZFIN;Acc:ZDB-GENE-041111-213]
ENSOMYG00000011474	cd226	-1.20798	0.0146727	DOWN	CD226 molecule [Source:ZFIN;Acc:ZDB-GENE-070112-1322]
ENSOMYG00000060723	NKD2	-1.20921	0.00506102	DOWN	NKD inhibitor of WNT signaling pathway 2 [Source:HGNC Symbol;Acc:HGNC:17046]
ENSOMYG00000018602	rassf5	-1.21157	0.0109365	DOWN	Ras association domain family member 5 [Source:ZFIN;Acc:ZDB-GENE-141219-8]
ENSOMYG00000005852	hells	-1.21177	0.0010037	DOWN	helicase, lymphoid specific [Source:ZFIN;Acc:ZDB-GENE-030131-9923]
ENSOMYG00000001507	dnase1l1l	-1.21313	0.0091782	DOWN	deoxyribonuclease I-like 1-like [Source:ZFIN;Acc:ZDB-GENE-040718-100]
ENSOMYG00000044507	KIF18A	-1.21415	0.00617025	DOWN	kinesin family member 18A [Source:HGNC Symbol;Acc:HGNC:29441]
ENSOMYG00000022452	PM20D2	-1.21502	0.0278807	DOWN	peptidase M20 domain containing 2 [Source:HGNC Symbol;Acc:HGNC:21408]
ENSOMYG00000038525	si:ch211-266i6.3	-1.21645	0.0089329	DOWN	si:ch211-266i6.3 [Source:ZFIN;Acc:ZDB-GENE-030131-5420]
ENSOMYG00000001142	DTL	-1.2193	0.0371596	DOWN	denticleless E3 ubiquitin protein ligase homolog [Source:HGNC Symbol;Acc:HGNC:30288]
ENSOMYG00000001039	plin3	-1.22186	0.0182033	DOWN	perilipin 3 [Source:ZFIN;Acc:ZDB-GENE-030131-7218]
ENSOMYG00000028549	si:ch211-63o20.7	-1.22628	0.00588214	DOWN	si:ch211-63o20.7 [Source:ZFIN;Acc:ZDB-GENE-041001-194]
ENSOMYG00000035643	npr3	-1.22919	0.0159609	DOWN	natriuretic peptide receptor 3 [Source:ZFIN;Acc:ZDB-GENE-060531-91]
ENSOMYG00000000722	chaf1a	-1.23102	0.00639443	DOWN	chromatin assembly factor 1, subunit A (p150) [Source:ZFIN;Acc:ZDB-GENE-030131-5366]
ENSOMYG00000039285	vav2	-1.23665	0.00777293	DOWN	vav 2 guanine nucleotide exchange factor [Source:ZFIN;Acc:ZDB-GENE-091204-420]
ENSOMYG00000042388	sox21b	-1.23671	0.00805471	DOWN	SRY-box transcription factor 21b [Source:ZFIN;Acc:ZDB-GENE-040429-1]
ENSOMYG00000036917	foxa1	-1.24074	0.0170129	DOWN	forkhead box A1 [Source:ZFIN;Acc:ZDB-GENE-990415-78]
ENSOMYG00000004544	si:dkey-24p1.1	-1.24193	0.0438984	DOWN	si:dkey-24p1.1 [Source:ZFIN;Acc:ZDB-GENE-060503-631]
ENSOMYG00000038605	IGF1	-1.24265	0.0256357	DOWN	insulin like growth factor 1 [Source:HGNC Symbol;Acc:HGNC:5464]
ENSOMYG00000000408	ndufb8	-1.24533	0.00241943	DOWN	NADH:ubiquinone oxidoreductase subunit B8 [Source:ZFIN;Acc:ZDB-GENE-040426-1858]
ENSOMYG00000004154	ndufb5	-1.24622	0.0177269	DOWN	NADH:ubiquinone oxidoreductase subunit B5 [Source:ZFIN;Acc:ZDB-GENE-011010-1]
ENSOMYG00000040830	sez6b	-1.24783	0.0467865	DOWN	seizure related 6 homolog b [Source:ZFIN;Acc:ZDB-GENE-110628-3]
ENSOMYG00000005078	lnx1	-1.24808	0.0170502	DOWN	ligand of numb-protein X 1 [Source:ZFIN;Acc:ZDB-GENE-030131-9439]
ENSOMYG00000057612	hspb3	-1.25128	0.0172092	DOWN	heat shock protein, alpha-crystallin-related, b3 [Source:ZFIN;Acc:ZDB-GENE-070705-338]
ENSOMYG00000007935	slc6a11a	-1.25224	0.000245429	DOWN	solute carrier family 6 member 11a [Source:ZFIN;Acc:ZDB-GENE-030131-3729]
ENSOMYG00000027263	ccnb3	-1.25977	0.0257274	DOWN	cyclin B3 [Source:ZFIN;Acc:ZDB-GENE-060929-684]
ENSOMYG00000042032	SNAI2	-1.26019	0.00435338	DOWN	snail family transcriptional repressor 2 [Source:HGNC Symbol;Acc:HGNC:11094]
ENSOMYG00000015503	RPE65	-1.26103	0.00426143	DOWN	retinoid isomerohydrolase RPE65 [Source:HGNC Symbol;Acc:HGNC:10294]
ENSOMYG00000035640	BCL11B	-1.26357	0.00846341	DOWN	BCL11 transcription factor B [Source:HGNC Symbol;Acc:HGNC:13222]
ENSOMYG00000016667	trpm4a	-1.26364	0.0181235	DOWN	transient receptor potential cation channel, subfamily M, member 4a [Source:ZFIN;Acc:ZDB-GENE-090302-3]
ENSOMYG00000045767	ido1	-1.26449	0.00549765	DOWN	indoleamine 2,3-dioxygenase 1 [Source:ZFIN;Acc:ZDB-GENE-080228-2]
ENSOMYG00000015092	cdkn3	-1.26542	0.00187033	DOWN	cyclin dependent kinase inhibitor 3 [Source:ZFIN;Acc:ZDB-GENE-060427-2]
ENSOMYG00000067789	TERF1	-1.26682	0.025385	DOWN	telomeric repeat binding factor 1 [Source:HGNC Symbol;Acc:HGNC:11728]
ENSOMYG00000025035	psmb12	-1.26689	0.0359739	DOWN	proteasome 20S subunit beta 12 [Source:ZFIN;Acc:ZDB-GENE-001208-1]
ENSOMYG00000044120	si:ch211-137a8.4	-1.2705	0.0425023	DOWN	si:ch211-137a8.4 [Source:ZFIN;Acc:ZDB-GENE-030131-3742]
ENSOMYG00000010238	aspm	-1.27096	0.00469942	DOWN	assembly factor for spindle microtubules [Source:ZFIN;Acc:ZDB-GENE-050208-620]
ENSOMYG00000038193	ST3GAL1	-1.27525	0.0332679	DOWN	ST3 beta-galactoside alpha-2,3-sialyltransferase 1 [Source:HGNC Symbol;Acc:HGNC:10862]
ENSOMYG00000014647	si:dkey-31g6.6	-1.27775	0.00932461	DOWN	si:dkey-31g6.6 [Source:ZFIN;Acc:ZDB-GENE-110209-1]
ENSOMYG00000016312	poc1bl	-1.28322	0.0465719	DOWN	POC1 centriolar protein homolog B (Chlamydomonas), like [Source:ZFIN;Acc:ZDB-GENE-050306-41]
ENSOMYG00000056431	dctpp1	-1.285	0.00714272	DOWN	dCTP pyrophosphatase 1 [Source:ZFIN;Acc:ZDB-GENE-040426-1741]
ENSOMYG00000034736	abcd2	-1.28673	0.0163742	DOWN	ATP-binding cassette, sub-family D (ALD), member 2 [Source:ZFIN;Acc:ZDB-GENE-050517-28]
ENSOMYG00000048244	mki67	-1.29242	0.0162136	DOWN	marker of proliferation Ki-67 [Source:ZFIN;Acc:ZDB-GENE-030131-9771]
ENSOMYG00000016132	rhno1	-1.29272	0.000276403	DOWN	RAD9-HUS1-RAD1 interacting nuclear orphan 1 [Source:ZFIN;Acc:ZDB-GENE-141219-42]
ENSOMYG00000045084	kif11	-1.29601	0.00667635	DOWN	kinesin family member 11 [Source:ZFIN;Acc:ZDB-GENE-020426-1]
ENSOMYG00000044487	CDCA7L	-1.29797	0.00880268	DOWN	cell division cycle associated 7 like [Source:HGNC Symbol;Acc:HGNC:30777]
ENSOMYG00000004014	ptger1b	-1.3012	0.0240131	DOWN	prostaglandin E receptor 1b (subtype EP1) [Source:ZFIN;Acc:ZDB-GENE-100922-278]
ENSOMYG00000004381	dctd	-1.30638	0.00867487	DOWN	dCMP deaminase [Source:ZFIN;Acc:ZDB-GENE-050417-116]
ENSOMYG00000047080	BAIAP2	-1.31076	0.0375437	DOWN	BAR/IMD domain containing adaptor protein 2 [Source:HGNC Symbol;Acc:HGNC:947]
ENSOMYG00000010560	mtf2	-1.3195	0.000606159	DOWN	metal response element binding transcription factor 2 [Source:ZFIN;Acc:ZDB-GENE-060512-94]
ENSOMYG00000002818	pitpnc1b	-1.31956	0.0185367	DOWN	phosphatidylinositol transfer protein cytoplasmic 1b [Source:ZFIN;Acc:ZDB-GENE-041114-158]
ENSOMYG00000001306	phf19	-1.31963	0.00234746	DOWN	PHD finger protein 19 [Source:ZFIN;Acc:ZDB-GENE-081105-128]
ENSOMYG00000004701	sqlea	-1.3205	3.61017e-05	DOWN	squalene epoxidase a [Source:ZFIN;Acc:ZDB-GENE-071004-98]
ENSOMYG00000009318	uhrf1	-1.32703	0.00129544	DOWN	ubiquitin-like with PHD and ring finger domains 1 [Source:ZFIN;Acc:ZDB-GENE-040426-2039]
ENSOMYG00000029797	hnf4a	-1.33032	0.0140709	DOWN	hepatocyte nuclear factor 4, alpha [Source:ZFIN;Acc:ZDB-GENE-030131-1077]
ENSOMYG00000015974	abcd3a	-1.3356	0.00580563	DOWN	ATP-binding cassette, sub-family D (ALD), member 3a [Source:ZFIN;Acc:ZDB-GENE-040426-2868]
ENSOMYG00000003106	lnx1	-1.33692	0.0408008	DOWN	ligand of numb-protein X 1 [Source:ZFIN;Acc:ZDB-GENE-030131-9439]
ENSOMYG00000021393	pcdh20	-1.34375	0.0168421	DOWN	protocadherin 20 [Source:ZFIN;Acc:ZDB-GENE-091204-115]
ENSOMYG00000006152	ncaph	-1.34388	0.029438	DOWN	non-SMC condensin I complex, subunit H [Source:ZFIN;Acc:ZDB-GENE-070112-652]
ENSOMYG00000047466	zgc:110540	-1.34531	0.000731346	DOWN	zgc:110540 [Source:ZFIN;Acc:ZDB-GENE-050327-77]
ENSOMYG00000003248	wfdc2	-1.34673	0.00882163	DOWN	WAP four-disulfide core domain 2 [Source:ZFIN;Acc:ZDB-GENE-090313-47]
ENSOMYG00000047534	fads6	-1.34815	0.0489032	DOWN	fatty acid desaturase 6 [Source:ZFIN;Acc:ZDB-GENE-141009-1]
ENSOMYG00000040920	pipox	-1.34908	1.12761e-05	DOWN	pipecolic acid oxidase [Source:ZFIN;Acc:ZDB-GENE-110627-2]
ENSOMYG00000046754	SHCBP1	-1.35194	0.0145914	DOWN	SHC binding and spindle associated 1 [Source:HGNC Symbol;Acc:HGNC:29547]
ENSOMYG00000005512	mblac2	-1.3534	0.000453978	DOWN	metallo-beta-lactamase domain containing 2 [Source:ZFIN;Acc:ZDB-GENE-081104-313]
ENSOMYG00000040361	CLSPN	-1.35928	0.0292846	DOWN	claspin [Source:HGNC Symbol;Acc:HGNC:19715]
ENSOMYG00000018721	klf17	-1.37362	0.0254238	DOWN	Kruppel like factor 17 [Source:ZFIN;Acc:ZDB-GENE-010129-1]
ENSOMYG00000024575	IMPG2	-1.37501	0.00209652	DOWN	interphotoreceptor matrix proteoglycan 2 [Source:HGNC Symbol;Acc:HGNC:18362]
ENSOMYG00000011528	pou3f3b	-1.37593	0.0336317	DOWN	POU class 3 homeobox 3b [Source:ZFIN;Acc:ZDB-GENE-980526-140]
ENSOMYG00000015127	zgc:101810	-1.37937	0.00817224	DOWN	zgc:101810 [Source:ZFIN;Acc:ZDB-GENE-041121-7]
ENSOMYG00000027235	zgc:101810	-1.38973	0.0174912	DOWN	zgc:101810 [Source:ZFIN;Acc:ZDB-GENE-041121-7]
ENSOMYG00000036018	prim2	-1.39261	0.011509	DOWN	DNA primase subunit 2 [Source:ZFIN;Acc:ZDB-GENE-050522-471]
ENSOMYG00000003398	psat1	-1.39851	0.0147664	DOWN	phosphoserine aminotransferase 1 [Source:ZFIN;Acc:ZDB-GENE-030131-5723]
ENSOMYG00000077394	tacr1b	-1.40763	0.042728	DOWN	tachykinin receptor 1b [Source:ZFIN;Acc:ZDB-GENE-091117-17]
ENSOMYG00000030943	blm	-1.41053	0.0197573	DOWN	BLM RecQ like helicase [Source:ZFIN;Acc:ZDB-GENE-070702-5]
ENSOMYG00000024096	tap2a	-1.41413	0.00150813	DOWN	transporter associated with antigen processing, subunit type a [Source:ZFIN;Acc:ZDB-GENE-030616-245]
ENSOMYG00000041412	zgc:154006	-1.42438	9.5628e-05	DOWN	zgc:154006 [Source:ZFIN;Acc:ZDB-GENE-061013-134]
ENSOMYG00000025741	kpna2	-1.42914	0.00456343	DOWN	karyopherin alpha 2 (RAG cohort 1, importin alpha 1) [Source:ZFIN;Acc:ZDB-GENE-040718-22]
ENSOMYG00000064701	rasl12	-1.43181	0.00407551	DOWN	RAS-like, family 12 [Source:ZFIN;Acc:ZDB-GENE-040426-1201]
ENSOMYG00000025332	zgc:158258	-1.43273	0.0121535	DOWN	zgc:158258 [Source:ZFIN;Acc:ZDB-GENE-070112-2272]
ENSOMYG00000014370	chrm2a	-1.43759	0.0201766	DOWN	cholinergic receptor, muscarinic 2a [Source:ZFIN;Acc:ZDB-GENE-030314-1]
ENSOMYG00000020212	RYR3	-1.44019	0.00467771	DOWN	ryanodine receptor 3 [Source:HGNC Symbol;Acc:HGNC:10485]
ENSOMYG00000004520	ccnf	-1.4402	0.0274831	DOWN	cyclin F [Source:ZFIN;Acc:ZDB-GENE-021030-2]
ENSOMYG00000044801	cdc20	-1.44499	0.00389636	DOWN	cell division cycle 20 homolog [Source:ZFIN;Acc:ZDB-GENE-040426-2044]
ENSOMYG00000024502	slc25a22b	-1.44679	0.00110345	DOWN	solute carrier family 25 member 22b [Source:ZFIN;Acc:ZDB-GENE-110408-66]
ENSOMYG00000034507	si:dkey-185m8.2	-1.45292	0.0317115	DOWN	si:dkey-185m8.2 [Source:ZFIN;Acc:ZDB-GENE-160114-60]
ENSOMYG00000044997	aaas	-1.45423	0.00377978	DOWN	achalasia, adrenocortical insufficiency, alacrimia [Source:ZFIN;Acc:ZDB-GENE-030912-4]
ENSOMYG00000026971	pkp1b	-1.46003	0.00192166	DOWN	plakophilin 1b [Source:ZFIN;Acc:ZDB-GENE-030131-417]
ENSOMYG00000022659	pde6c	-1.46017	0.0183665	DOWN	phosphodiesterase 6C, cGMP-specific, cone, alpha prime [Source:ZFIN;Acc:ZDB-GENE-040426-1664]
ENSOMYG00000012408	ttbk2b	-1.46225	0.00574652	DOWN	tau tubulin kinase 2b [Source:ZFIN;Acc:ZDB-GENE-030131-8246]
ENSOMYG00000017937	rab11fip5b	-1.47048	0.0350162	DOWN	RAB11 family interacting protein 5b (class I) [Source:ZFIN;Acc:ZDB-GENE-041111-111]
ENSOMYG00000018528	krt5	-1.47173	0.0128764	DOWN	keratin 5 [Source:ZFIN;Acc:ZDB-GENE-991110-23]
ENSOMYG00000004180	tfap2a	-1.47236	0.0354263	DOWN	transcription factor AP-2 alpha [Source:ZFIN;Acc:ZDB-GENE-011212-6]
ENSOMYG00000022764	sertad3	-1.47821	0.00913846	DOWN	SERTA domain containing 3 [Source:ZFIN;Acc:ZDB-GENE-050327-34]
ENSOMYG00000002209	hmgb3a	-1.48345	0.0305257	DOWN	high mobility group box 3a [Source:ZFIN;Acc:ZDB-GENE-050428-1]
ENSOMYG00000016632	plppr4a	-1.48483	0.0316145	DOWN	phospholipid phosphatase related 4a [Source:ZFIN;Acc:ZDB-GENE-070705-280]
ENSOMYG00000036266	si:ch211-212k18.5	-1.48541	0.041707	DOWN	si:ch211-212k18.5 [Source:ZFIN;Acc:ZDB-GENE-030131-379]
ENSOMYG00000043188	cytip	-1.48592	0.000292299	DOWN	cytohesin 1 interacting protein [Source:ZFIN;Acc:ZDB-GENE-140106-76]
ENSOMYG00000005504	ccne2	-1.49433	0.0315714	DOWN	cyclin E2 [Source:ZFIN;Acc:ZDB-GENE-030131-9689]
ENSOMYG00000018649	GLIPR1	-1.49528	0.0485874	DOWN	GLI pathogenesis related 1 [Source:HGNC Symbol;Acc:HGNC:17001]
ENSOMYG00000029603	dio2	-1.50542	0.000859116	DOWN	iodothyronine deiodinase 2 [Source:ZFIN;Acc:ZDB-GENE-030327-4]
ENSOMYG00000029607	odf2a	-1.50669	6.67808e-05	DOWN	outer dense fiber of sperm tails 2a [Source:ZFIN;Acc:ZDB-GENE-091117-46]
ENSOMYG00000035696	TMEM132D	-1.50867	0.00129627	DOWN	transmembrane protein 132D [Source:HGNC Symbol;Acc:HGNC:29411]
ENSOMYG00000009450	cenpi	-1.50968	0.00365617	DOWN	centromere protein I [Source:ZFIN;Acc:ZDB-GENE-060810-127]
ENSOMYG00000027207	cdc45	-1.5134	0.00341534	DOWN	CDC45 cell division cycle 45 homolog (S. cerevisiae) [Source:ZFIN;Acc:ZDB-GENE-040426-2710]
ENSOMYG00000000321	fabp7b	-1.51619	0.000153836	DOWN	fatty acid binding protein 7, brain, b [Source:ZFIN;Acc:ZDB-GENE-040614-4]
ENSOMYG00000013593	e2f8	-1.51704	7.3661e-05	DOWN	E2F transcription factor 8 [Source:ZFIN;Acc:ZDB-GENE-041111-260]
ENSOMYG00000013175	lrp11	-1.5207	0.0131382	DOWN	low density lipoprotein receptor-related protein 11 [Source:ZFIN;Acc:ZDB-GENE-030131-7847]
ENSOMYG00000047763	G6PC2	-1.52248	0.0158639	DOWN	glucose-6-phosphatase catalytic subunit 2 [Source:HGNC Symbol;Acc:HGNC:28906]
ENSOMYG00000010296	exo1	-1.52463	0.000469065	DOWN	exonuclease 1 [Source:ZFIN;Acc:ZDB-GENE-040426-2828]
ENSOMYG00000016252	ddc	-1.53241	0.0191888	DOWN	dopa decarboxylase [Source:ZFIN;Acc:ZDB-GENE-040426-2656]
ENSOMYG00000036854	faslg	-1.53325	0.0429035	DOWN	Fas ligand (TNF superfamily, member 6) [Source:ZFIN;Acc:ZDB-GENE-070410-16]
ENSOMYG00000042158	btc	-1.54093	0.00499606	DOWN	betacellulin, epidermal growth factor family member [Source:ZFIN;Acc:ZDB-GENE-050311-1]
ENSOMYG00000047933	k13	-1.54442	0.00431337	DOWN	keratin 15 [Source:ZFIN;Acc:ZDB-GENE-040426-2931]
ENSOMYG00000033266	ano6	-1.54735	0.0114119	DOWN	anoctamin 6 [Source:ZFIN;Acc:ZDB-GENE-081104-64]
ENSOMYG00000048086	sult6b1	-1.54887	3.91926e-08	DOWN	sulfotransferase family, cytosolic, 6b, member 1 [Source:ZFIN;Acc:ZDB-GENE-050417-228]
ENSOMYG00000029486	msh6	-1.57045	0.0258698	DOWN	mutS homolog 6 (E. coli) [Source:ZFIN;Acc:ZDB-GENE-020905-3]
ENSOMYG00000005596	SPATA1	-1.5736	0.010456	DOWN	spermatogenesis associated 1 [Source:HGNC Symbol;Acc:HGNC:14682]
ENSOMYG00000011172	saga	-1.57491	0.00413963	DOWN	S-antigen; retina and pineal gland (arrestin) a [Source:ZFIN;Acc:ZDB-GENE-040426-1538]
ENSOMYG00000045037	cdk1	-1.58797	0.0200241	DOWN	cyclin dependent kinase 1 [Source:ZFIN;Acc:ZDB-GENE-010320-1]
ENSOMYG00000039505	KIF23	-1.59008	0.043396	DOWN	kinesin family member 23 [Source:HGNC Symbol;Acc:HGNC:6392]
ENSOMYG00000023590	KIF20A	-1.59897	0.0328403	DOWN	kinesin family member 20A [Source:HGNC Symbol;Acc:HGNC:9787]
ENSOMYG00000032330	gpr37b	-1.60896	0.0292721	DOWN	G protein-coupled receptor 37b [Source:ZFIN;Acc:ZDB-GENE-041210-264]
ENSOMYG00000003163	orc6	-1.61252	0.0429026	DOWN	origin recognition complex, subunit 6 [Source:ZFIN;Acc:ZDB-GENE-030131-2976]
ENSOMYG00000001173	hs2st1b	-1.62357	0.0311905	DOWN	heparan sulfate 2-O-sulfotransferase 1b [Source:ZFIN;Acc:ZDB-GENE-100304-1]
ENSOMYG00000047551	pbk	-1.62607	0.0273857	DOWN	PDZ binding kinase [Source:ZFIN;Acc:ZDB-GENE-030523-2]
ENSOMYG00000003321	cdc6	-1.62923	0.000319478	DOWN	cell division cycle 6 homolog (S. cerevisiae) [Source:ZFIN;Acc:ZDB-GENE-050506-131]
ENSOMYG00000019835	zgc:110339	-1.63156	0.00357682	DOWN	zgc:110339 [Source:ZFIN;Acc:ZDB-GENE-050417-323]
ENSOMYG00000031565	ANLN	-1.64116	0.00402485	DOWN	anillin, actin binding protein [Source:HGNC Symbol;Acc:HGNC:14082]
ENSOMYG00000031676	prf1.3	-1.6414	0.000323101	DOWN	perforin 1.3 [Source:ZFIN;Acc:ZDB-GENE-060503-461]
ENSOMYG00000024417	irx2a	-1.64664	0.0274042	DOWN	iroquois homeobox 2a [Source:ZFIN;Acc:ZDB-GENE-040426-1446]
ENSOMYG00000046373	slitrk6	-1.65046	0.0180669	DOWN	SLIT and NTRK-like family, member 6 [Source:ZFIN;Acc:ZDB-GENE-030131-2816]
ENSOMYG00000036934	TTC6	-1.65086	0.000907096	DOWN	tetratricopeptide repeat domain 6 [Source:HGNC Symbol;Acc:HGNC:19739]
ENSOMYG00000032542	ect2	-1.65775	0.00207785	DOWN	epithelial cell transforming 2 [Source:ZFIN;Acc:ZDB-GENE-040831-2]
ENSOMYG00000034217	mmadhca	-1.65823	0.0356331	DOWN	metabolism of cobalamin associated Da [Source:ZFIN;Acc:ZDB-GENE-040718-152]
ENSOMYG00000022268	mad2l1	-1.66325	0.0149797	DOWN	MAD2 mitotic arrest deficient-like 1 (yeast) [Source:ZFIN;Acc:ZDB-GENE-030515-3]
ENSOMYG00000046448	mcm9	-1.67981	0.000909519	DOWN	minichromosome maintenance 9 homologous recombination repair factor [Source:ZFIN;Acc:ZDB-GENE-041014-310]
ENSOMYG00000018726	sostdc1a	-1.69086	0.0158432	DOWN	sclerostin domain containing 1a [Source:ZFIN;Acc:ZDB-GENE-050417-64]
ENSOMYG00000018434	esco2	-1.69204	0.0439392	DOWN	establishment of sister chromatid cohesion N-acetyltransferase 2 [Source:ZFIN;Acc:ZDB-GENE-050913-156]
ENSOMYG00000024630	vig1	-1.69937	0.0176814	DOWN	radical S-adenosyl methionine domain containing 2 [Source:ZFIN;Acc:ZDB-GENE-050913-129]
ENSOMYG00000024558	birc5a	-1.70775	0.00377027	DOWN	baculoviral IAP repeat containing 5a [Source:ZFIN;Acc:ZDB-GENE-030826-1]
ENSOMYG00000037774	TRAF5	-1.71182	0.00451875	DOWN	TNF receptor associated factor 5 [Source:HGNC Symbol;Acc:HGNC:12035]
ENSOMYG00000018650	trim71	-1.71984	0.0437913	DOWN	tripartite motif containing 71, E3 ubiquitin protein ligase [Source:ZFIN;Acc:ZDB-GENE-040128-1]
ENSOMYG00000045395	slc35a3b	-1.72043	0.00158362	DOWN	solute carrier family 35 member A3b [Source:ZFIN;Acc:ZDB-GENE-050417-460]
ENSOMYG00000057661	cdca5	-1.73494	0.0417292	DOWN	cell division cycle associated 5 [Source:ZFIN;Acc:ZDB-GENE-030131-235]
ENSOMYG00000036572	zgc:162171	-1.73882	6.9727e-08	DOWN	zgc:162171 [Source:ZFIN;Acc:ZDB-GENE-070424-24]
ENSOMYG00000064330	zwilch	-1.74835	3.63555e-06	DOWN	zwilch kinetochore protein [Source:ZFIN;Acc:ZDB-GENE-050420-101]
ENSOMYG00000046774	KIF20A	-1.76039	0.00369107	DOWN	kinesin family member 20A [Source:HGNC Symbol;Acc:HGNC:9787]
ENSOMYG00000039583	ccnb1	-1.76052	7.31243e-05	DOWN	cyclin B1 [Source:ZFIN;Acc:ZDB-GENE-000406-10]
ENSOMYG00000007756	kifc1	-1.76212	0.0243629	DOWN	kinesin family member C1 [Source:ZFIN;Acc:ZDB-GENE-000208-21]
ENSOMYG00000004908	g6fl	-1.76439	0.0237351	DOWN	g6f-like [Source:ZFIN;Acc:ZDB-GENE-130220-1]
ENSOMYG00000015976	abcb9	-1.77412	0.0127205	DOWN	ATP-binding cassette, sub-family B (MDR/TAP), member 9 [Source:ZFIN;Acc:ZDB-GENE-050517-12]
ENSOMYG00000028556	nek2	-1.7777	0.00121442	DOWN	NIMA-related kinase 2 [Source:ZFIN;Acc:ZDB-GENE-040426-752]
ENSOMYG00000016800	ndrg1a	-1.77933	0.0266256	DOWN	N-myc downstream regulated 1a [Source:ZFIN;Acc:ZDB-GENE-030826-34]
ENSOMYG00000013613	LSS	-1.7803	0.00011945	DOWN	lanosterol synthase [Source:HGNC Symbol;Acc:HGNC:6708]
ENSOMYG00000024195	dhrs3b	-1.79077	0.0481479	DOWN	dehydrogenase/reductase (SDR family) member 3b [Source:ZFIN;Acc:ZDB-GENE-041010-172]
ENSOMYG00000022421	spc24	-1.7926	0.0393332	DOWN	SPC24 component of NDC80 kinetochore complex [Source:ZFIN;Acc:ZDB-GENE-050522-456]
ENSOMYG00000045779	nupr1b	-1.79268	0.00513101	DOWN	nuclear protein 1b [Source:ZFIN;Acc:ZDB-GENE-030131-4653]
ENSOMYG00000019276	cdaa	-1.79477	0.0451759	DOWN	cytidine deaminase a [Source:ZFIN;Acc:ZDB-GENE-170609-2]
ENSOMYG00000007398	ten1	-1.79744	0.045943	DOWN	TEN1 subunit of CST complex [Source:ZFIN;Acc:ZDB-GENE-030131-8755]
ENSOMYG00000047004	gins4	-1.82935	0.00187137	DOWN	GINS complex subunit 4 (Sld5 homolog) [Source:ZFIN;Acc:ZDB-GENE-040801-59]
ENSOMYG00000044476	adamts18	-1.84191	0.00227792	DOWN	ADAM metallopeptidase with thrombospondin type 1 motif, 18 [Source:ZFIN;Acc:ZDB-GENE-070815-1]
ENSOMYG00000000994	wt-t1b	-1.84695	0.00502094	DOWN	WT1 transcription factor a [Source:ZFIN;Acc:ZDB-GENE-980526-558]
ENSOMYG00000041586	gins2	-1.85027	6.30753e-06	DOWN	GINS complex subunit 2 [Source:ZFIN;Acc:ZDB-GENE-050419-19]
ENSOMYG00000038123	ttk	-1.8573	0.000764951	DOWN	ttk protein kinase [Source:ZFIN;Acc:ZDB-GENE-030123-1]
ENSOMYG00000035594	vrk1	-1.85998	0.00138587	DOWN	VRK serine/threonine kinase 1 [Source:ZFIN;Acc:ZDB-GENE-040426-2709]
ENSOMYG00000056384	tmem276a	-1.87059	0.0410353	DOWN	si:ch211-87j1.4 [Source:ZFIN;Acc:ZDB-GENE-131127-49]
ENSOMYG00000042429	lck	-1.87136	0.01979	DOWN	LCK proto-oncogene, Src family tyrosine kinase [Source:ZFIN;Acc:ZDB-GENE-040617-1]
ENSOMYG00000015326	cenph	-1.87316	0.00139702	DOWN	centromere protein H [Source:ZFIN;Acc:ZDB-GENE-081104-340]
ENSOMYG00000029971	kpna2	-1.87584	3.06383e-05	DOWN	karyopherin alpha 2 (RAG cohort 1, importin alpha 1) [Source:ZFIN;Acc:ZDB-GENE-040718-22]
ENSOMYG00000043170	RRM2	-1.88628	0.00202205	DOWN	ribonucleotide reductase regulatory subunit M2 [Source:HGNC Symbol;Acc:HGNC:10452]
ENSOMYG00000031369	nsg2	-1.89075	0.00869698	DOWN	neuronal vesicle trafficking associated 2 [Source:ZFIN;Acc:ZDB-GENE-030131-3694]
ENSOMYG00000028291	trip13	-1.89831	0.00346278	DOWN	thyroid hormone receptor interactor 13 [Source:ZFIN;Acc:ZDB-GENE-040426-1488]
ENSOMYG00000010384	gins4	-1.90113	0.00992525	DOWN	GINS complex subunit 4 (Sld5 homolog) [Source:ZFIN;Acc:ZDB-GENE-040801-59]
ENSOMYG00000038405	kif4	-1.92209	0.00522221	DOWN	kinesin family member 4 [Source:ZFIN;Acc:ZDB-GENE-040426-1545]
ENSOMYG00000022146	aipl1	-1.92323	0.0370992	DOWN	aryl hydrocarbon receptor interacting protein-like 1 [Source:ZFIN;Acc:ZDB-GENE-131121-577]
ENSOMYG00000041856	cdk1	-1.95013	0.0248652	DOWN	cyclin dependent kinase 1 [Source:ZFIN;Acc:ZDB-GENE-010320-1]
ENSOMYG00000024965	dnmt3bb.1	-1.96648	0.00565191	DOWN	DNA (cytosine-5-)-methyltransferase 3 beta, duplicate b.1 [Source:ZFIN;Acc:ZDB-GENE-050314-1]
ENSOMYG00000007986	gins3	-1.96993	5.26848e-06	DOWN	GINS complex subunit 3 [Source:ZFIN;Acc:ZDB-GENE-040721-1]
ENSOMYG00000017787	ifit8	-1.97816	0.0385333	DOWN	interferon-induced protein with tetratricopeptide repeats 8 [Source:ZFIN;Acc:ZDB-GENE-051127-17]
ENSOMYG00000029693	sqlea	-1.97877	0.00548299	DOWN	squalene epoxidase a [Source:ZFIN;Acc:ZDB-GENE-071004-98]
ENSOMYG00000069397	mcm3	-1.9845	0.00163306	DOWN	minichromosome maintenance complex component 3 [Source:ZFIN;Acc:ZDB-GENE-020419-4]
ENSOMYG00000017658	DLX2	-1.98506	0.0300366	DOWN	distal-less homeobox 2 [Source:HGNC Symbol;Acc:HGNC:2915]
ENSOMYG00000029221	mcm5	-1.99016	0.00156607	DOWN	minichromosome maintenance complex component 5 [Source:ZFIN;Acc:ZDB-GENE-021209-1]
ENSOMYG00000016024	sostdc1b	-1.99525	0.0389341	DOWN	sclerostin domain containing 1b [Source:ZFIN;Acc:ZDB-GENE-060503-653]
ENSOMYG00000041709	panx3	-1.99871	0.0315226	DOWN	pannexin 3 [Source:ZFIN;Acc:ZDB-GENE-091204-114]
ENSOMYG00000017817	cdc6	-2.00274	0.00754196	DOWN	cell division cycle 6 homolog (S. cerevisiae) [Source:ZFIN;Acc:ZDB-GENE-050506-131]
ENSOMYG00000010126	cdca7a	-2.00422	4.57603e-05	DOWN	cell division cycle associated 7a [Source:ZFIN;Acc:ZDB-GENE-050417-29]
ENSOMYG00000073658	PDZRN4	-2.00578	0.0351642	DOWN	PDZ domain containing ring finger 4 [Source:HGNC Symbol;Acc:HGNC:30552]
ENSOMYG00000019951	cdt1	-2.00906	0.000191041	DOWN	chromatin licensing and DNA replication factor 1 [Source:ZFIN;Acc:ZDB-GENE-070111-1]
ENSOMYG00000008695	sox12	-2.01093	0.0340301	DOWN	SRY-box transcription factor 12 [Source:ZFIN;Acc:ZDB-GENE-040724-33]
ENSOMYG00000047653	ccnb1	-2.01169	0.0188659	DOWN	cyclin B1 [Source:ZFIN;Acc:ZDB-GENE-000406-10]
ENSOMYG00000041944	kif11	-2.014	0.00506025	DOWN	kinesin family member 11 [Source:ZFIN;Acc:ZDB-GENE-020426-1]
ENSOMYG00000054974	cks2	-2.02648	0.0202831	DOWN	CDC28 protein kinase regulatory subunit 2 [Source:ZFIN;Acc:ZDB-GENE-050208-508]
ENSOMYG00000041834	pif1	-2.04898	0.0130437	DOWN	PIF1 5'-to-3' DNA helicase homolog (S. cerevisiae) [Source:ZFIN;Acc:ZDB-GENE-030131-4928]
ENSOMYG00000023120	epob	-2.05228	0.00405447	DOWN	erythropoietin b [Source:ZFIN;Acc:ZDB-GENE-141216-428]
ENSOMYG00000012456	brinp3a.2	-2.0619	0.00566384	DOWN	bone morphogenetic protein/retinoic acid inducible neural-specific 3a, tandem duplicate 2 [Source:ZFIN;Acc:ZDB-GENE-131119-53]
ENSOMYG00000033325	mcm2	-2.08867	9.23011e-05	DOWN	minichromosome maintenance complex component 2 [Source:ZFIN;Acc:ZDB-GENE-020419-24]
ENSOMYG00000031800	mcm2	-2.10472	5.05976e-05	DOWN	minichromosome maintenance complex component 2 [Source:ZFIN;Acc:ZDB-GENE-020419-24]
ENSOMYG00000034475	CCNA2	-2.11295	0.00168168	DOWN	cyclin A2 [Source:HGNC Symbol;Acc:HGNC:1578]
ENSOMYG00000009171	tgfb5	-2.11842	0.0145463	DOWN	transforming growth factor, beta 5 [Source:ZFIN;Acc:ZDB-GENE-130425-3]
ENSOMYG00000036169	rasl11a	-2.12533	0.0245729	DOWN	RAS-like, family 11, member A [Source:ZFIN;Acc:ZDB-GENE-050417-384]
ENSOMYG00000053448	cks2	-2.13704	0.027039	DOWN	CDC28 protein kinase regulatory subunit 2 [Source:ZFIN;Acc:ZDB-GENE-050208-508]
ENSOMYG00000049578	klf12a	-2.13817	0.025504	DOWN	Kruppel like factor 12a [Source:ZFIN;Acc:ZDB-GENE-030131-9188]
ENSOMYG00000017239	e2f7	-2.14645	0.00266532	DOWN	E2F transcription factor 7 [Source:ZFIN;Acc:ZDB-GENE-030131-3527]
ENSOMYG00000014589	gpr156	-2.21205	0.0214246	DOWN	G protein-coupled receptor 156 [Source:ZFIN;Acc:ZDB-GENE-060201-2]
ENSOMYG00000004291	wdr83os	-2.21511	0.00343057	DOWN	WD repeat domain 83 opposite strand [Source:ZFIN;Acc:ZDB-GENE-040426-1674]
ENSOMYG00000022528	mcm5	-2.21928	3.04188e-09	DOWN	minichromosome maintenance complex component 5 [Source:ZFIN;Acc:ZDB-GENE-021209-1]
ENSOMYG00000046372	slc6a11a	-2.22337	0.0331805	DOWN	solute carrier family 6 member 11a [Source:ZFIN;Acc:ZDB-GENE-030131-3729]
ENSOMYG00000043867	SNORA11	-2.23166	0.039086	DOWN	small nucleolar RNA, H/ACA box 11 [Source:HGNC Symbol;Acc:HGNC:32599]
ENSOMYG00000019518	NASP	-2.23963	0.00184634	DOWN	nuclear autoantigenic sperm protein [Source:HGNC Symbol;Acc:HGNC:7644]
ENSOMYG00000032288	aqp1a.2	-2.24069	0.0333467	DOWN	aquaporin 1a (Colton blood group), tandem duplicate 2 [Source:ZFIN;Acc:ZDB-GENE-100409-1]
ENSOMYG00000062701	hmx4	-2.25875	0.0149806	DOWN	H6 family homeobox 4 [Source:ZFIN;Acc:ZDB-GENE-060825-142]
ENSOMYG00000022980	dio2	-2.2709	2.72497e-09	DOWN	iodothyronine deiodinase 2 [Source:ZFIN;Acc:ZDB-GENE-030327-4]
ENSOMYG00000045611	cenpo	-2.2779	0.0447279	DOWN	centromere protein O [Source:ZFIN;Acc:ZDB-GENE-070928-16]
ENSOMYG00000036024	pitx2	-2.29809	0.0177704	DOWN	paired-like homeodomain 2 [Source:ZFIN;Acc:ZDB-GENE-990714-27]
ENSOMYG00000069184	fndc5b	-2.30708	0.00939476	DOWN	fibronectin type III domain containing 5b [Source:ZFIN;Acc:ZDB-GENE-060503-916]
ENSOMYG00000021668	spp1	-2.30978	0.0339097	DOWN	secreted phosphoprotein 1 [Source:ZFIN;Acc:ZDB-GENE-050706-97]
ENSOMYG00000037794	cenpx	-2.34388	2.00854e-05	DOWN	centromere protein X [Source:ZFIN;Acc:ZDB-GENE-110411-78]
ENSOMYG00000001219	gins1	-2.35912	7.86546e-07	DOWN	GINS complex subunit 1 (Psf1 homolog) [Source:ZFIN;Acc:ZDB-GENE-041010-184]
ENSOMYG00000060820	rab11fip4a	-2.36744	0.046411	DOWN	RAB11 family interacting protein 4 (class II) a [Source:ZFIN;Acc:ZDB-GENE-040718-266]
ENSOMYG00000007559	rbbp8l	-2.36816	0.0119199	DOWN	retinoblastoma binding protein 8-like [Source:ZFIN;Acc:ZDB-GENE-030131-3078]
ENSOMYG00000018441	chaf1b	-2.40495	5.84528e-05	DOWN	chromatin assembly factor 1, subunit B [Source:ZFIN;Acc:ZDB-GENE-040426-1947]
ENSOMYG00000043539	lgi3	-2.43101	0.00198734	DOWN	leucine-rich repeat LGI family, member 3 [Source:ZFIN;Acc:ZDB-GENE-060217-4]
ENSOMYG00000034605	bfsp2	-2.43366	0.0406874	DOWN	beaded filament structural protein 2, phakinin [Source:ZFIN;Acc:ZDB-GENE-041212-58]
ENSOMYG00000000981	zgc:174938	-2.45683	0.0485148	DOWN	si:dkey-152b24.7 [Source:ZFIN;Acc:ZDB-GENE-100921-77]
ENSOMYG00000022186	cdca7a	-2.46391	2.1501e-07	DOWN	cell division cycle associated 7a [Source:ZFIN;Acc:ZDB-GENE-050417-29]
ENSOMYG00000059985	tmem178bb	-2.46681	0.0466164	DOWN	transmembrane protein 178Bb [Source:ZFIN;Acc:ZDB-GENE-040718-92]
ENSOMYG00000070417	dnase1	-2.4678	0.0402441	DOWN	deoxyribonuclease I [Source:ZFIN;Acc:ZDB-GENE-040718-423]
ENSOMYG00000042348	sez6a	-2.47169	0.016873	DOWN	seizure related 6 homolog a [Source:ZFIN;Acc:ZDB-GENE-030131-8208]
ENSOMYG00000028157	hoxa10b	-2.4986	0.0124729	DOWN	homeobox A10b [Source:ZFIN;Acc:ZDB-GENE-990415-97]
ENSOMYG00000020121	SLC25A19	-2.52254	0.014536	DOWN	solute carrier family 25 member 19 [Source:HGNC Symbol;Acc:HGNC:14409]
ENSOMYG00000032019	lmx1bb	-2.54571	0.0142802	DOWN	LIM homeobox transcription factor 1, beta b [Source:ZFIN;Acc:ZDB-GENE-050114-2]
ENSOMYG00000041456	raly	-2.58046	0.0241459	DOWN	RALY heterogeneous nuclear ribonucleoprotein [Source:ZFIN;Acc:ZDB-GENE-041010-127]
ENSOMYG00000046553	zgc:153704	-2.62489	0.0372653	DOWN	zgc:153704 [Source:ZFIN;Acc:ZDB-GENE-060929-1114]
ENSOMYG00000018316	phlda1	-2.62882	0.0256657	DOWN	pleckstrin homology-like domain, family A, member 1 [Source:ZFIN;Acc:ZDB-GENE-041010-103]
ENSOMYG00000028836	lmo1	-2.63775	0.0288717	DOWN	LIM domain only 1 [Source:ZFIN;Acc:ZDB-GENE-021115-6]
ENSOMYG00000072870	cmah	-2.64521	0.0393569	DOWN	cytidine monophospho-N-acetylneuraminic acid hydroxylase [Source:ZFIN;Acc:ZDB-GENE-040704-33]
ENSOMYG00000044638	cldn30	-2.66398	0.0436361	DOWN	claudin 30 [Source:ZFIN;Acc:ZDB-GENE-060421-4745]
ENSOMYG00000034997	plbd1a	-2.68301	0.0278743	DOWN	phospholipase B domain containing 1a [Source:ZFIN;Acc:ZDB-GENE-050411-22]
ENSOMYG00000016908	slc47a4	-2.70053	0.000269389	DOWN	solute carrier family 47 member 4 [Source:ZFIN;Acc:ZDB-GENE-130530-865]
ENSOMYG00000012601	SNORD57	-2.70691	0.0324037	DOWN	small nucleolar RNA, C/D box 57 [Source:HGNC Symbol;Acc:HGNC:10207]
ENSOMYG00000025977	tcf19l	-2.71174	0.0012035	DOWN	transcription factor 19 (SC1), like [Source:ZFIN;Acc:ZDB-GENE-060324-2]
ENSOMYG00000010112	BBOF1	-2.74296	0.0192272	DOWN	basal body orientation factor 1 [Source:HGNC Symbol;Acc:HGNC:19855]
ENSOMYG00000023166	rnf32	-2.74559	0.0252512	DOWN	ring finger protein 32 [Source:ZFIN;Acc:ZDB-GENE-061013-39]
ENSOMYG00000046885	TEX9	-2.75665	0.00680246	DOWN	testis expressed 9 [Source:HGNC Symbol;Acc:HGNC:29585]
ENSOMYG00000003827	scn1ba	-2.75677	0.041576	DOWN	sodium channel, voltage-gated, type I, beta a [Source:ZFIN;Acc:ZDB-GENE-060503-604]
ENSOMYG00000013814	ddc	-2.75702	0.000763105	DOWN	dopa decarboxylase [Source:ZFIN;Acc:ZDB-GENE-040426-2656]
ENSOMYG00000044194	NSMF	-2.76146	0.0083637	DOWN	NMDA receptor synaptonuclear signaling and neuronal migration factor [Source:HGNC Symbol;Acc:HGNC:29843]
ENSOMYG00000031865	rad54l	-2.76298	1.01489e-05	DOWN	RAD54 like [Source:ZFIN;Acc:ZDB-GENE-040426-968]
ENSOMYG00000011223	DLK1	-2.78574	0.0445703	DOWN	delta like non-canonical Notch ligand 1 [Source:HGNC Symbol;Acc:HGNC:2907]
ENSOMYG00000032775	KCTD15	-2.79446	0.0333343	DOWN	potassium channel tetramerization domain containing 15 [Source:HGNC Symbol;Acc:HGNC:23297]
ENSOMYG00000040044	med20	-2.81057	0.00912682	DOWN	mediator complex subunit 20 [Source:ZFIN;Acc:ZDB-GENE-040801-104]
ENSOMYG00000022748	kctd16a	-2.81871	0.0397486	DOWN	potassium channel tetramerization domain containing 16a [Source:ZFIN;Acc:ZDB-GENE-060117-1]
ENSOMYG00000046816	astn1	-2.82614	0.00652047	DOWN	astrotactin 1 [Source:ZFIN;Acc:ZDB-GENE-050320-140]
ENSOMYG00000048315	toporsa	-2.97259	0.0248623	DOWN	topoisomerase I binding, arginine/serine-rich a [Source:ZFIN;Acc:ZDB-GENE-030131-6401]
ENSOMYG00000034439	slc6a19a.2	-2.97303	0.0467288	DOWN	solute carrier family 6 member 19a, tandem duplicate 2 [Source:ZFIN;Acc:ZDB-GENE-141210-16]
ENSOMYG00000041903	mis12	-2.9881	0.000449048	DOWN	MIS12 kinetochore complex component [Source:ZFIN;Acc:ZDB-GENE-040426-1372]
ENSOMYG00000007908	hivep3a	-3.00514	0.00828879	DOWN	HIVEP zinc finger 3a [Source:ZFIN;Acc:ZDB-GENE-081029-2]
ENSOMYG00000054208	inpp5kb	-3.01417	0.000356924	DOWN	inositol polyphosphate-5-phosphatase Kb [Source:ZFIN;Acc:ZDB-GENE-100408-3]
ENSOMYG00000062760	SCARNA14	-3.14481	0.032559	DOWN	small Cajal body-specific RNA 14 [Source:HGNC Symbol;Acc:HGNC:32571]
ENSOMYG00000015927	drd1b	-3.19817	0.0181963	DOWN	dopamine receptor D1b [Source:ZFIN;Acc:ZDB-GENE-070524-2]
ENSOMYG00000033717	fzd3a	-3.21702	0.0146104	DOWN	frizzled class receptor 3a [Source:ZFIN;Acc:ZDB-GENE-990415-225]
ENSOMYG00000034595	foxf2b	-3.22149	0.000567146	DOWN	forkhead box F2b [Source:ZFIN;Acc:ZDB-GENE-041001-130]
ENSOMYG00000032490	slc5a8l	-3.22693	0.0271183	DOWN	solute carrier family 5 member 8, like [Source:ZFIN;Acc:ZDB-GENE-061110-98]
ENSOMYG00000016848	MIR150	-3.22773	0.0336435	DOWN	microRNA 150 [Source:HGNC Symbol;Acc:HGNC:31537]
ENSOMYG00000061791	cmah	-3.27786	0.024906	DOWN	cytidine monophospho-N-acetylneuraminic acid hydroxylase [Source:ZFIN;Acc:ZDB-GENE-040704-33]
ENSOMYG00000004292	foxq1a	-3.29655	0.0031445	DOWN	forkhead box Q1a [Source:ZFIN;Acc:ZDB-GENE-070424-74]
ENSOMYG00000044428	FRMPD2	-3.2975	0.0277657	DOWN	FERM and PDZ domain containing 2 [Source:HGNC Symbol;Acc:HGNC:28572]
ENSOMYG00000010892	syt6a	-3.30292	0.0481142	DOWN	synaptotagmin VIa [Source:ZFIN;Acc:ZDB-GENE-090601-2]
ENSOMYG00000056160	si:dkey-160o24.3	-3.31748	0.0188125	DOWN	si:dkey-160o24.3 [Source:ZFIN;Acc:ZDB-GENE-140106-224]
ENSOMYG00000044234	BCAT1	-3.36124	0.00486228	DOWN	branched chain amino acid transaminase 1 [Source:HGNC Symbol;Acc:HGNC:976]
ENSOMYG00000005651	dnase1	-3.40528	0.017079	DOWN	deoxyribonuclease I [Source:ZFIN;Acc:ZDB-GENE-040718-423]
ENSOMYG00000059767	pora	-3.41403	0.0352302	DOWN	P450 (cytochrome) oxidoreductase a [Source:ZFIN;Acc:ZDB-GENE-050809-121]
ENSOMYG00000032667	foxf2b	-3.45744	0.0304098	DOWN	forkhead box F2b [Source:ZFIN;Acc:ZDB-GENE-041001-130]
ENSOMYG00000004506	dnajb13	-3.50637	0.0166257	DOWN	DnaJ heat shock protein family (Hsp40) member B13 [Source:ZFIN;Acc:ZDB-GENE-040910-4]
ENSOMYG00000019097	doc2a	-3.51529	0.000806219	DOWN	double C2-like domains, alpha [Source:ZFIN;Acc:ZDB-GENE-090706-1]
ENSOMYG00000047381	efnb3a	-3.5474	0.0013454	DOWN	ephrin-B3a [Source:ZFIN;Acc:ZDB-GENE-100316-1]
ENSOMYG00000010164	gad3	-3.5792	0.0275496	DOWN	glutamate decarboxylase 3 [Source:ZFIN;Acc:ZDB-GENE-070424-80]
ENSOMYG00000022550	si:dkeyp-81f3.4	-3.68976	0.000379973	DOWN	si:dkeyp-81f3.4 [Source:ZFIN;Acc:ZDB-GENE-160113-129]
ENSOMYG00000020185	anp	-3.70777	0.0046163	DOWN	natriuretic peptide A [Source:ZFIN;Acc:ZDB-GENE-030131-95]
ENSOMYG00000012144	si:cabz01093077.1	-3.77095	0.0109237	DOWN	si:cabz01093077.1 [Source:ZFIN;Acc:ZDB-GENE-160113-45]
ENSOMYG00000067063	si:dkey-191g9.5	-3.80782	0.000723569	DOWN	si:dkey-191g9.5 [Source:ZFIN;Acc:ZDB-GENE-090313-217]
ENSOMYG00000033930	C8orf34	-3.84057	0.00739927	DOWN	chromosome 8 open reading frame 34 [Source:HGNC Symbol;Acc:HGNC:30905]
ENSOMYG00000010998	f13a1b	-3.90983	0.00321008	DOWN	coagulation factor XIII, A1 polypeptide b [Source:ZFIN;Acc:ZDB-GENE-030131-9634]
ENSOMYG00000024632	hoxd11a	-3.97925	0.000539888	DOWN	homeobox D11a [Source:ZFIN;Acc:ZDB-GENE-990415-117]
ENSOMYG00000028880	tmem168a	-3.98233	0.00278796	DOWN	transmembrane protein 168a [Source:ZFIN;Acc:ZDB-GENE-050419-97]
ENSOMYG00000020235	map2k2b	-4.0186	0.0428125	DOWN	mitogen-activated protein kinase kinase 2b [Source:ZFIN;Acc:ZDB-GENE-080219-34]
ENSOMYG00000027268	NKX1-2	-4.0186	0.0428125	DOWN	NK1 homeobox 2 [Source:HGNC Symbol;Acc:HGNC:31652]
ENSOMYG00000005515	p2rx3b	-4.0186	0.0428125	DOWN	purinergic receptor P2X, ligand-gated ion channel, 3b [Source:ZFIN;Acc:ZDB-GENE-030319-3]
ENSOMYG00000038524	si:dkeyp-92c9.2	-4.0186	0.0428125	DOWN	si:dkeyp-92c9.2 [Source:ZFIN;Acc:ZDB-GENE-060503-468]
ENSOMYG00000008125	si:zfos-169g10.2	-4.0186	0.0428125	DOWN	si:zfos-169g10.2 [Source:ZFIN;Acc:ZDB-GENE-120215-119]
ENSOMYG00000027097	org	-4.04432	0.0252924	DOWN	oogenesis-related gene [Source:ZFIN;Acc:ZDB-GENE-050208-584]
ENSOMYG00000019328	prph2a	-4.05957	0.00429722	DOWN	peripherin 2a (retinal degeneration, slow) [Source:ZFIN;Acc:ZDB-GENE-000616-8]
ENSOMYG00000065275	sema5bb	-4.08299	0.00820445	DOWN	sema domain, seven thrombospondin repeats (type 1 and type 1-like), transmembrane domain (TM) and short cytoplasmic domain, (semaphorin) 5Bb [Source:ZFIN;Acc:ZDB-GENE-130530-778]
ENSOMYG00000067973	aqp8b	-4.13413	0.0361364	DOWN	aquaporin 8b [Source:ZFIN;Acc:ZDB-GENE-080220-47]
ENSOMYG00000013490	p2rx2	-4.13413	0.0361364	DOWN	purinergic receptor P2X, ligand-gated ion channel, 2 [Source:ZFIN;Acc:ZDB-GENE-030319-2]
ENSOMYG00000075369	aicda	-4.14879	0.019573	DOWN	activation-induced cytidine deaminase [Source:ZFIN;Acc:ZDB-GENE-041122-2]
ENSOMYG00000067997	cnih2	-4.15585	0.0346066	DOWN	cornichon family AMPA receptor auxiliary protein 2 [Source:ZFIN;Acc:ZDB-GENE-050320-96]
ENSOMYG00000063609	gpr6	-4.15585	0.0346066	DOWN	G protein-coupled receptor 6 [Source:ZFIN;Acc:ZDB-GENE-170413-1]
ENSOMYG00000060656	HTR2A	-4.17121	0.00842479	DOWN	5-hydroxytryptamine receptor 2A [Source:HGNC Symbol;Acc:HGNC:5293]
ENSOMYG00000020915	cts12	-4.17409	0.0193723	DOWN	cathepsin 12 [Source:ZFIN;Acc:ZDB-GENE-050208-336]
ENSOMYG00000011317	CATSPER3	-4.25189	0.0013166	DOWN	cation channel sperm associated 3 [Source:HGNC Symbol;Acc:HGNC:20819]
ENSOMYG00000063548	cenpn	-4.2524	0.000215792	DOWN	centromere protein N [Source:ZFIN;Acc:ZDB-GENE-030616-408]
ENSOMYG00000042789	kcnk10b	-4.26202	0.017076	DOWN	potassium channel, subfamily K, member 10b [Source:ZFIN;Acc:ZDB-GENE-050420-31]
ENSOMYG00000031059	gucy2d	-4.28508	0.00798124	DOWN	guanylate cyclase 2D, retinal [Source:ZFIN;Acc:ZDB-GENE-011128-9]
ENSOMYG00000046368	SLITRK5	-4.32488	0.0252727	DOWN	SLIT and NTRK like family member 5 [Source:HGNC Symbol;Acc:HGNC:20295]
ENSOMYG00000024257	il1rapl1a	-4.35878	0.00631503	DOWN	interleukin 1 receptor accessory protein-like 1a [Source:NCBI gene;Acc:568868]
ENSOMYG00000031963	CTXN2	-4.37919	0.0122332	DOWN	cortexin 2 [Source:HGNC Symbol;Acc:HGNC:31109]
ENSOMYG00000024041	MIR125B1	-4.38342	0.0117607	DOWN	microRNA 125b-1 [Source:HGNC Symbol;Acc:HGNC:31506]
ENSOMYG00000026682	si:ch73-60h1.1	-4.3911	0.000759518	DOWN	si:ch73-60h1.1 [Source:ZFIN;Acc:ZDB-GENE-140106-152]
ENSOMYG00000075471	adcy1a	-4.39123	0.0112007	DOWN	adenylate cyclase 1a [Source:ZFIN;Acc:ZDB-GENE-070705-302]
ENSOMYG00000050577	RBBP9	-4.39664	0.0217693	DOWN	RB binding protein 9, serine hydrolase [Source:HGNC Symbol;Acc:HGNC:9892]
ENSOMYG00000044634	cldnd	-4.39712	0.0218096	DOWN	claudin d [Source:ZFIN;Acc:ZDB-GENE-010328-4]
ENSOMYG00000038532	ush1c	-4.43524	0.0117157	DOWN	Usher syndrome 1C [Source:ZFIN;Acc:ZDB-GENE-060312-41]
ENSOMYG00000013576	fdx1b	-4.50346	0.01747	DOWN	ferredoxin 1b [Source:ZFIN;Acc:ZDB-GENE-060526-382]
ENSOMYG00000020181	nppb	-4.50346	0.01747	DOWN	natriuretic peptide B [Source:ZFIN;Acc:ZDB-GENE-130530-642]
ENSOMYG00000034062	optc	-4.50346	0.01747	DOWN	opticin [Source:ZFIN;Acc:ZDB-GENE-030131-1798]
ENSOMYG00000018740	syce2	-4.50346	0.01747	DOWN	synaptonemal complex central element protein 2 [Source:ZFIN;Acc:ZDB-GENE-050512-1]
ENSOMYG00000069209	MIR23A	-4.52248	0.00866593	DOWN	microRNA 23a [Source:HGNC Symbol;Acc:HGNC:31605]
ENSOMYG00000039475	wnt6b	-4.52914	0.00931033	DOWN	wingless-type MMTV integration site family, member 6b [Source:ZFIN;Acc:ZDB-GENE-070912-513]
ENSOMYG00000000651	hsf4	-4.55593	0.00721815	DOWN	heat shock transcription factor 4 [Source:ZFIN;Acc:ZDB-GENE-050306-18]
ENSOMYG00000060963	SCARNA14	-4.56252	0.00242566	DOWN	small Cajal body-specific RNA 14 [Source:HGNC Symbol;Acc:HGNC:32571]
ENSOMYG00000037730	sult4a1	-4.58233	0.000407244	DOWN	sulfotransferase family 4A, member 1 [Source:ZFIN;Acc:ZDB-GENE-060421-2705]
ENSOMYG00000032863	ppie	-4.5849	0.00256558	DOWN	peptidylprolyl isomerase E (cyclophilin E) [Source:ZFIN;Acc:ZDB-GENE-050417-167]
ENSOMYG00000019786	alx1	-4.60291	0.0141226	DOWN	ALX homeobox 1 [Source:ZFIN;Acc:ZDB-GENE-050419-191]
ENSOMYG00000054259	mettl25	-4.63055	0.00241029	DOWN	methyltransferase like 25 [Source:ZFIN;Acc:ZDB-GENE-041210-90]
ENSOMYG00000020940	pgm3	-4.64298	0.00580498	DOWN	phosphoglucomutase 3 [Source:ZFIN;Acc:ZDB-GENE-041024-13]
ENSOMYG00000000542	LIN28B	-4.65868	0.00628459	DOWN	lin-28 homolog B [Source:HGNC Symbol;Acc:HGNC:32207]
ENSOMYG00000037656	zgc:162592	-4.75891	0.000945816	DOWN	zgc:162592 [Source:ZFIN;Acc:ZDB-GENE-030131-5400]
ENSOMYG00000005318	hs3st3l	-4.76372	0.00409692	DOWN	heparan sulfate (glucosamine) 3-O-sulfotransferase 3-like [Source:ZFIN;Acc:ZDB-GENE-070202-6]
ENSOMYG00000043108	slc45a1	-4.78142	0.000318668	DOWN	solute carrier family 45 member 1 [Source:ZFIN;Acc:ZDB-GENE-070112-2152]
ENSOMYG00000031339	atp2b3a	-4.91051	0.00706578	DOWN	ATPase plasma membrane Ca2+ transporting 3a [Source:ZFIN;Acc:ZDB-GENE-040718-174]
ENSOMYG00000053698	gng3	-5.17313	0.00049838	DOWN	guanine nucleotide binding protein (G protein), gamma 3 [Source:ZFIN;Acc:ZDB-GENE-010705-1]
ENSOMYG00000064868	MINAR1	-5.31378	0.000166115	DOWN	membrane integral NOTCH2 associated receptor 1 [Source:HGNC Symbol;Acc:HGNC:29172]
ENSOMYG00000061140	tmtops3a	-5.32604	0.00243234	DOWN	teleost multiple tissue opsin 3a [Source:ZFIN;Acc:ZDB-GENE-130828-1]
ENSOMYG00000010229	hsd17b2	-5.35594	0.000142353	DOWN	hydroxysteroid (17-beta) dehydrogenase 2 [Source:ZFIN;Acc:ZDB-GENE-040928-1]
ENSOMYG00000067015	nphs1	-5.364	0.000160952	DOWN	NPHS1 adhesion molecule, nephrin [Source:ZFIN;Acc:ZDB-GENE-051102-1]
ENSOMYG00000018854	ebpl	-5.44475	0.000109371	DOWN	EBP like [Source:ZFIN;Acc:ZDB-GENE-030616-542]
ENSOMYG00000003145	cryba4	-5.48497	7.34676e-05	DOWN	crystallin, beta A4 [Source:ZFIN;Acc:ZDB-GENE-050522-143]
ENSOMYG00000018645	aqp8b	-5.50416	0.000548403	DOWN	aquaporin 8b [Source:ZFIN;Acc:ZDB-GENE-080220-47]
ENSOMYG00000024267	adorb1a	-5.596	0.000272998	DOWN	adenosine receptor B1a [Source:ZFIN;Acc:ZDB-GENE-041014-79]
ENSOMYG00000014689	rxfp2l	-6.34453	2.8946e-07	DOWN	relaxin family peptide receptor 2, like [Source:ZFIN;Acc:ZDB-GENE-060531-8]
ENSOMYG00000000907	nek2	-6.76027	2.50056e-08	DOWN	NIMA-related kinase 2 [Source:ZFIN;Acc:ZDB-GENE-040426-752]
ENSOMYG00000061342	saa	-6.94729	0.000118632	DOWN	serum amyloid A [Source:ZFIN;Acc:ZDB-GENE-040927-15]

## Sheet: Top_20_Upregulated_Meta
	Supplemetary Tabel S4B: Top 20 differentilly expressed upregulated genes.
SN	Gene_ID	Gene_Symbol	log2FoldChange	adj.P	Regulation	Gene_Description
1	ENSOMYG00000029610	scn1ba	20.7238	1.0585e-25	UP	sodium channel, voltage-gated, type I, beta a
2	ENSOMYG00000010447	hspa1b	8.13459	0.0412752	UP	heat shock protein family A (Hsp70) member 1B
3	ENSOMYG00000005025	slitrk3b	7.8492	7.18516e-05	UP	SLIT and NTRK-like family, member 3b
4	ENSOMYG00000034757	hspa4l	7.41921	0.0446925	UP	heat shock protein 4 like
5	ENSOMYG00000029994	as3mt	7.06332	0.000354443	UP	arsenite methyltransferase
6	ENSOMYG00000054931	prom1b	7.00934	0.000393343	UP	prominin 1 b
7	ENSOMYG00000023837	HTR1B	7.00009	0.000400397	UP	5-hydroxytryptamine receptor 1B
8	ENSOMYG00000036455	trpc3	6.61812	2.103e-07	UP	transient receptor potential cation channel, subfamily C, member 3
9	ENSOMYG00000018660	casq2	6.41662	4.40883e-05	UP	calsequestrin 2
10	ENSOMYG00000062678	tmem121b	6.35266	7.66057e-07	UP	transmembrane protein 121B
11	ENSOMYG00000021686	pdzd7a	6.25718	6.36944e-06	UP	PDZ domain containing 7a
12	ENSOMYG00000044394	rcvrn3	6.24941	4.76288e-06	UP	recoverin 3
13	ENSOMYG00000001466	gc2	6.19389	2.77611e-07	UP	guanylyl cyclase 2
14	ENSOMYG00000053172	prom1b	6.13596	3.72423e-06	UP	prominin 1 b
15	ENSOMYG00000032225	hk2	5.8329	0.000132129	UP	hexokinase 2
16	ENSOMYG00000015551	CA12	5.63799	0.00102139	UP	carbonic anhydrase 12
17	ENSOMYG00000015268	SORCS1	5.59149	0.00113848	UP	sortilin related VPS10 domain containing receptor 1
18	ENSOMYG00000068944	rbp1.1	5.58359	5.1952e-05	UP	retinol binding protein 1, cellular, tandem duplicate 1
19	ENSOMYG00000043818	PURG	5.5644	0.000107922	UP	purine rich element binding protein G
20	ENSOMYG00000025223	ST18	5.53186	4.34161e-08	UP	ST18 C2H2C-type zinc finger transcription factor

## Sheet: Top_20_Downregulated_Meta
	Supplemetary Tabel S4C: Top 20 differentilly expressed downregulated genes.
SN	Gene_ID	Gene_Symbol	log2FoldChange	adj.P	Regulation	Gene_Description
1	ENSOMYG00000061342	saa	-6.94729	0.000118632	DOWN	serum amyloid A
2	ENSOMYG00000000907	nek2	-6.76027	2.50056e-08	DOWN	NIMA-related kinase 2
3	ENSOMYG00000014689	rxfp2l	-6.34453	2.8946e-07	DOWN	relaxin family peptide receptor 2, like
4	ENSOMYG00000024267	adorb1a	-5.596	0.000272998	DOWN	adenosine receptor B1a
5	ENSOMYG00000018645	aqp8b	-5.50416	0.000548403	DOWN	aquaporin 8b
6	ENSOMYG00000003145	cryba4	-5.48497	7.34676e-05	DOWN	crystallin, beta A4
7	ENSOMYG00000018854	ebpl	-5.44475	0.000109371	DOWN	EBP like
8	ENSOMYG00000067015	nphs1	-5.364	0.000160952	DOWN	NPHS1 adhesion molecule, nephrin
9	ENSOMYG00000010229	hsd17b2	-5.35594	0.000142353	DOWN	hydroxysteroid (17-beta) dehydrogenase 2
10	ENSOMYG00000061140	tmtops3a	-5.32604	0.00243234	DOWN	teleost multiple tissue opsin 3a
11	ENSOMYG00000064868	MINAR1	-5.31378	0.000166115	DOWN	membrane integral NOTCH2 associated receptor 1
12	ENSOMYG00000053698	gng3	-5.17313	0.00049838	DOWN	guanine nucleotide binding protein (G protein), gamma 3
13	ENSOMYG00000031339	atp2b3a	-4.91051	0.00706578	DOWN	ATPase plasma membrane Ca2+ transporting 3a
14	ENSOMYG00000043108	slc45a1	-4.78142	0.000318668	DOWN	solute carrier family 45 member 1
15	ENSOMYG00000005318	hs3st3l	-4.76372	0.00409692	DOWN	heparan sulfate (glucosamine) 3-O-sulfotransferase 3-like
16	ENSOMYG00000037656	zgc:162592	-4.75891	0.000945816	DOWN	zgc:162592
17	ENSOMYG00000000542	LIN28B	-4.65868	0.00628459	DOWN	lin-28 homolog B
18	ENSOMYG00000020940	pgm3	-4.64298	0.00580498	DOWN	phosphoglucomutase 3
19	ENSOMYG00000054259	mettl25	-4.63055	0.00241029	DOWN	methyltransferase like 25
20	ENSOMYG00000019786	alx1	-4.60291	0.0141226	DOWN	ALX homeobox 1

## Sheet: DEGs_Heat Stress_Datasets
Supplemetary Tabel S4D: Differentilly expressed upregulated and downregulated genes of combined heat stress datasets.
Gene_ID	Gene_Symbol	Gene_Description	log2FoldChange	adjusted.P.Value	Regulation
ENSOMYG00000010447	hspa1b	heat shock protein family A (Hsp70) member 1B [Source:ZFIN;Acc:ZDB-GENE-060503-867]	8.13459	0.0412752	UP
ENSOMYG00000034757	hspa4l	heat shock protein 4 like [Source:ZFIN;Acc:ZDB-GENE-030131-2412]	7.41921	0.0446925	UP
ENSOMYG00000023837	HTR1B	5-hydroxytryptamine receptor 1B [Source:HGNC Symbol;Acc:HGNC:5287]	7.00009	0.000400397	UP
ENSOMYG00000036455	trpc3	transient receptor potential cation channel, subfamily C, member 3 [Source:ZFIN;Acc:ZDB-GENE-140129-1]	6.61812	2.103e-07	UP
ENSOMYG00000018660	casq2	calsequestrin 2 [Source:ZFIN;Acc:ZDB-GENE-010724-12]	6.41662	4.40883e-05	UP
ENSOMYG00000032225	hk2	hexokinase 2 [Source:ZFIN;Acc:ZDB-GENE-040426-2017]	5.8329	0.000132129	UP
ENSOMYG00000015551	CA12	carbonic anhydrase 12 [Source:HGNC Symbol;Acc:HGNC:1371]	5.63799	0.00102139	UP
ENSOMYG00000037923	HTR3A	5-hydroxytryptamine receptor 3A [Source:HGNC Symbol;Acc:HGNC:5297]	5.41314	0.000221613	UP
ENSOMYG00000032181	TNNT2	troponin T2, cardiac type [Source:HGNC Symbol;Acc:HGNC:11949]	5.25264	0.000286249	UP
ENSOMYG00000030883	CDH10	cadherin 10 [Source:HGNC Symbol;Acc:HGNC:1749]	5.2438	0.00303032	UP
ENSOMYG00000049908	SLC9A5	solute carrier family 9 member A5 [Source:HGNC Symbol;Acc:HGNC:11078]	5.13982	0.000100651	UP
ENSOMYG00000021533	GCG	glucagon [Source:HGNC Symbol;Acc:HGNC:4191]	5.1285	0.000145407	UP
ENSOMYG00000041216	ccnh	cyclin H [Source:ZFIN;Acc:ZDB-GENE-050320-13]	5.0399	0.000775928	UP
ENSOMYG00000019093	KCNK2	potassium two pore domain channel subfamily K member 2 [Source:HGNC Symbol;Acc:HGNC:6277]	4.99149	0.000223402	UP
ENSOMYG00000021564	zcchc14	zinc finger, CCHC domain containing 14 [Source:ZFIN;Acc:ZDB-GENE-060503-319]	4.96197	0.00111089	UP
ENSOMYG00000016047	asz1	ankyrin repeat, SAM and basic leucine zipper domain containing 1 [Source:ZFIN;Acc:ZDB-GENE-040426-988]	4.93298	0.00250901	UP
ENSOMYG00000054038	slc6a3	solute carrier family 6 member 3 [Source:ZFIN;Acc:ZDB-GENE-010316-1]	4.86861	0.00128554	UP
ENSOMYG00000001367	gabrb3	gamma-aminobutyric acid type A receptor subunit beta3 [Source:ZFIN;Acc:ZDB-GENE-101102-2]	4.79283	0.00105668	UP
ENSOMYG00000065868	ahcy	adenosylhomocysteinase [Source:ZFIN;Acc:ZDB-GENE-031219-6]	4.76944	0.000316437	UP
ENSOMYG00000003894	GPR61	G protein-coupled receptor 61 [Source:HGNC Symbol;Acc:HGNC:13300]	4.62652	2.31325e-05	UP
ENSOMYG00000030588	KCNMB4	potassium calcium-activated channel subfamily M regulatory beta subunit 4 [Source:HGNC Symbol;Acc:HGNC:6289]	4.40047	0.00130551	UP
ENSOMYG00000073725	wnt1	wingless-type MMTV integration site family, member 1 [Source:ZFIN;Acc:ZDB-GENE-980526-526]	4.36991	0.0232694	UP
ENSOMYG00000012135	DGKB	diacylglycerol kinase beta [Source:HGNC Symbol;Acc:HGNC:2850]	4.24595	4.42676e-12	UP
ENSOMYG00000040697	lrrc47	leucine rich repeat containing 47 [Source:ZFIN;Acc:ZDB-GENE-060503-289]	4.09952	0.0228427	UP
ENSOMYG00000063943	CLCA1	chloride channel accessory 1 [Source:HGNC Symbol;Acc:HGNC:2015]	4.05965	0.0407359	UP
ENSOMYG00000004532	grm3	glutamate receptor, metabotropic 3 [Source:ZFIN;Acc:ZDB-GENE-061009-13]	3.73345	0.0318232	UP
ENSOMYG00000014190	ARF3	ADP ribosylation factor 3 [Source:HGNC Symbol;Acc:HGNC:654]	3.64892	0.0179715	UP
ENSOMYG00000032851	nr4a1	nuclear receptor subfamily 4, group A, member 1 [Source:ZFIN;Acc:ZDB-GENE-040704-11]	3.63961	0.0388466	UP
ENSOMYG00000042950	bag3	BCL2 associated athanogene 3 [Source:ZFIN;Acc:ZDB-GENE-040801-40]	3.61611	0.0392651	UP
ENSOMYG00000062799	scg3	secretogranin III [Source:ZFIN;Acc:ZDB-GENE-040426-1725]	3.50385	0.00373112	UP
ENSOMYG00000031235	MIR146B	microRNA 146b [Source:HGNC Symbol;Acc:HGNC:32079]	3.38446	0.00248561	UP
ENSOMYG00000060655	KBTBD13	kelch repeat and BTB domain containing 13 [Source:HGNC Symbol;Acc:HGNC:37227]	3.35764	0.0316325	UP
ENSOMYG00000016715	MYH6	myosin heavy chain 6 [Source:HGNC Symbol;Acc:HGNC:7576]	3.35104	2.64685e-05	UP
ENSOMYG00000012048	EN1	engrailed homeobox 1 [Source:HGNC Symbol;Acc:HGNC:3342]	3.27068	0.00232226	UP
ENSOMYG00000034531	CREM	cAMP responsive element modulator [Source:HGNC Symbol;Acc:HGNC:2352]	3.21936	0.0490991	UP
ENSOMYG00000000213	pip5kl1	phosphatidylinositol-4-phosphate 5-kinase-like 1 [Source:ZFIN;Acc:ZDB-GENE-060526-248]	3.17434	1.1563e-07	UP
ENSOMYG00000014709	RGS2	regulator of G protein signaling 2 [Source:HGNC Symbol;Acc:HGNC:9998]	3.13644	0.00831741	UP
ENSOMYG00000011303	mb	myoglobin [Source:ZFIN;Acc:ZDB-GENE-040426-1430]	3.02354	0.0122442	UP
ENSOMYG00000035608	esrrb	estrogen-related receptor beta [Source:ZFIN;Acc:ZDB-GENE-040616-2]	2.95259	0.00424011	UP
ENSOMYG00000004613	USP50	ubiquitin specific peptidase 50 [Source:HGNC Symbol;Acc:HGNC:20079]	2.90109	0.0104897	UP
ENSOMYG00000009309	ST3GAL1	ST3 beta-galactoside alpha-2,3-sialyltransferase 1 [Source:HGNC Symbol;Acc:HGNC:10862]	2.8995	0.0486345	UP
ENSOMYG00000022744	MYBPC3	myosin binding protein C3 [Source:HGNC Symbol;Acc:HGNC:7551]	2.76487	0.00247849	UP
ENSOMYG00000000925	ddit4	DNA-damage-inducible transcript 4 [Source:ZFIN;Acc:ZDB-GENE-031002-35]	2.75097	0.00707842	UP
ENSOMYG00000037528	MAFG	MAF bZIP transcription factor G [Source:HGNC Symbol;Acc:HGNC:6781]	2.70562	0.0342713	UP
ENSOMYG00000000567	TPH1	tryptophan hydroxylase 1 (tryptophan 5-monooxygenase) a [Source:ZFIN;Acc:ZDB-GENE-030317-1]	2.66151	0.000156433	UP
ENSOMYG00000027025	GJA3	gap junction protein alpha 3 [Source:HGNC Symbol;Acc:HGNC:4277]	2.6596	0.00389253	UP
ENSOMYG00000005425	plek2	pleckstrin 2 [Source:ZFIN;Acc:ZDB-GENE-080219-2]	2.59057	0.0369222	UP
ENSOMYG00000010194	fkbp5	FKBP prolyl isomerase 5 [Source:ZFIN;Acc:ZDB-GENE-030616-630]	2.52239	0.0340054	UP
ENSOMYG00000014149	casq2	calsequestrin 2 [Source:ZFIN;Acc:ZDB-GENE-010724-12]	2.48924	0.0113688	UP
ENSOMYG00000040968	ctsc	cathepsin C [Source:ZFIN;Acc:ZDB-GENE-030619-9]	2.43766	0.0419329	UP
ENSOMYG00000041329	MXI1	MAX interactor 1, dimerization protein [Source:HGNC Symbol;Acc:HGNC:7534]	2.42094	0.00582108	UP
ENSOMYG00000020125	nr4a1	nuclear receptor subfamily 4, group A, member 1 [Source:ZFIN;Acc:ZDB-GENE-040704-11]	2.40378	0.0415658	UP
ENSOMYG00000016183	ptn	pleiotrophin [Source:ZFIN;Acc:ZDB-GENE-030624-1]	2.36752	0.00747063	UP
ENSOMYG00000016957	nr4a3	nuclear receptor subfamily 4, group A, member 3 [Source:ZFIN;Acc:ZDB-GENE-070824-4]	2.30676	4.14961e-05	UP
ENSOMYG00000039537	ZBTB21	zinc finger and BTB domain containing 21 [Source:HGNC Symbol;Acc:HGNC:13083]	2.30494	0.00555116	UP
ENSOMYG00000018467	EGLN3	egl-9 family hypoxia inducible factor 3 [Source:HGNC Symbol;Acc:HGNC:14661]	2.29453	1.0685e-05	UP
ENSOMYG00000068030	ddit4	DNA-damage-inducible transcript 4 [Source:ZFIN;Acc:ZDB-GENE-031002-35]	2.23093	0.00746566	UP
ENSOMYG00000037566	pgr	progesterone receptor [Source:ZFIN;Acc:ZDB-GENE-990415-214]	2.21707	0.000593798	UP
ENSOMYG00000020277	pfkfb3	6-phosphofructo-2-kinase/fructose-2,6-biphosphatase 3 [Source:ZFIN;Acc:ZDB-GENE-040426-2724]	2.17962	0.00591767	UP
ENSOMYG00000069516	hspa13	heat shock protein 70 family, member 13 [Source:ZFIN;Acc:ZDB-GENE-070410-58]	2.13686	0.0249049	UP
ENSOMYG00000041283	p4ha2	procollagen-proline, 2-oxoglutarate 4-dioxygenase (proline 4-hydroxylase), alpha polypeptide 2 [Source:ZFIN;Acc:ZDB-GENE-030827-1]	2.09354	0.00841561	UP
ENSOMYG00000012103	pcsk1	proprotein convertase subtilisin/kexin type 1 [Source:ZFIN;Acc:ZDB-GENE-071009-1]	2.07419	0.00104232	UP
ENSOMYG00000056982	nr4a3	nuclear receptor subfamily 4, group A, member 3 [Source:ZFIN;Acc:ZDB-GENE-070824-4]	2.02525	0.000413871	UP
ENSOMYG00000026585	ero1a	endoplasmic reticulum oxidoreductase 1 alpha [Source:ZFIN;Acc:ZDB-GENE-040426-1312]	2.02338	1.39422e-07	UP
ENSOMYG00000037257	slc8a3	solute carrier family 8 member 3 [Source:ZFIN;Acc:ZDB-GENE-050810-1]	1.96288	0.0169444	UP
ENSOMYG00000046233	fkbp5	FKBP prolyl isomerase 5 [Source:ZFIN;Acc:ZDB-GENE-030616-630]	1.95448	2.99744e-05	UP
ENSOMYG00000031231	GADD45B	growth arrest and DNA damage inducible beta [Source:HGNC Symbol;Acc:HGNC:4096]	1.93484	0.00340022	UP
ENSOMYG00000045812	hspa13	heat shock protein 70 family, member 13 [Source:ZFIN;Acc:ZDB-GENE-070410-58]	1.89617	0.0184428	UP
ENSOMYG00000073963	alg1	ALG1 chitobiosyldiphosphodolichol beta-mannosyltransferase [Source:ZFIN;Acc:ZDB-GENE-030131-6093]	1.8213	0.00102491	UP
ENSOMYG00000040066	slc7a5	solute carrier family 7 member 5 [Source:ZFIN;Acc:ZDB-GENE-080818-4]	1.81365	0.0011003	UP
ENSOMYG00000069831	manf	mesencephalic astrocyte-derived neurotrophic factor [Source:ZFIN;Acc:ZDB-GENE-060929-640]	1.77638	0.0395433	UP
ENSOMYG00000023975	eif2ak3	eukaryotic translation initiation factor 2-alpha kinase 3 [Source:ZFIN;Acc:ZDB-GENE-050414-2]	1.74802	0.00628241	UP
ENSOMYG00000049204	PPP2R2C	protein phosphatase 2 regulatory subunit Bgamma [Source:HGNC Symbol;Acc:HGNC:9306]	1.72341	0.010725	UP
ENSOMYG00000033281	nfatc1	nuclear factor of activated T cells 1 [Source:ZFIN;Acc:ZDB-GENE-060503-677]	1.69208	0.00090976	UP
ENSOMYG00000034782	tert	telomerase reverse transcriptase [Source:ZFIN;Acc:ZDB-GENE-080405-1]	1.67611	0.0341223	UP
ENSOMYG00000017399	JUNB	JunB proto-oncogene, AP-1 transcription factor subunit [Source:HGNC Symbol;Acc:HGNC:6205]	1.59688	0.0376917	UP
ENSOMYG00000058535	socs2	suppressor of cytokine signaling 2 [Source:ZFIN;Acc:ZDB-GENE-041210-171]	1.59405	0.0209651	UP
ENSOMYG00000031942	ddx5	DEAD (Asp-Glu-Ala-Asp) box helicase 5 [Source:ZFIN;Acc:ZDB-GENE-030131-925]	1.57347	0.0139476	UP
ENSOMYG00000028099	bag4	BCL2 associated athanogene 4 [Source:ZFIN;Acc:ZDB-GENE-030131-5484]	1.56758	0.022095	UP
ENSOMYG00000027040	RPE65	retinoid isomerohydrolase RPE65 [Source:HGNC Symbol;Acc:HGNC:10294]	1.55367	0.0117185	UP
ENSOMYG00000037334	arg2	arginase 2 [Source:ZFIN;Acc:ZDB-GENE-030131-1334]	1.52694	0.00684345	UP
ENSOMYG00000041476	ndufaf4	NADH:ubiquinone oxidoreductase complex assembly factor 4 [Source:ZFIN;Acc:ZDB-GENE-060810-114]	1.51687	0.0242444	UP
ENSOMYG00000008788	mfsd13a	major facilitator superfamily domain containing 13A [Source:ZFIN;Acc:ZDB-GENE-041212-83]	1.51326	0.00481709	UP
ENSOMYG00000003084	ATP11A	ATPase phospholipid transporting 11A [Source:HGNC Symbol;Acc:HGNC:13552]	1.50994	0.0115895	UP
ENSOMYG00000055945	kcnj8	potassium inwardly rectifying channel subfamily J member 8 [Source:ZFIN;Acc:ZDB-GENE-060308-1]	1.50578	0.000202918	UP
ENSOMYG00000063206	ccn5	cellular communication network factor 5 [Source:ZFIN;Acc:ZDB-GENE-060223-1]	1.48878	0.00699692	UP
ENSOMYG00000041794	serpine1	serpin peptidase inhibitor, clade E (nexin, plasminogen activator inhibitor type 1), member 1 [Source:ZFIN;Acc:ZDB-GENE-070912-60]	1.44503	1.34302e-05	UP
ENSOMYG00000022652	slc1a5	solute carrier family 1 member 5 [Source:ZFIN;Acc:ZDB-GENE-070501-4]	1.43657	0.00163618	UP
ENSOMYG00000043585	etfa	electron transfer flavoprotein subunit alpha [Source:ZFIN;Acc:ZDB-GENE-030131-4449]	1.42854	0.0473094	UP
ENSOMYG00000017847	KCNN1	potassium calcium-activated channel subfamily N member 1 [Source:HGNC Symbol;Acc:HGNC:6290]	1.42392	0.0233004	UP
ENSOMYG00000012434	CREM	cAMP responsive element modulator [Source:HGNC Symbol;Acc:HGNC:2352]	1.41616	1.17272e-07	UP
ENSOMYG00000042667	cebpd	CCAAT enhancer binding protein delta [Source:ZFIN;Acc:ZDB-GENE-020111-4]	1.40353	1.32382e-06	UP
ENSOMYG00000000538	bnip3	BCL2 interacting protein 3 [Source:ZFIN;Acc:ZDB-GENE-030131-8060]	1.39848	0.034899	UP
ENSOMYG00000029048	slc1a5	solute carrier family 1 member 5 [Source:ZFIN;Acc:ZDB-GENE-070501-4]	1.39736	0.000155266	UP
ENSOMYG00000022190	ZBTB21	zinc finger and BTB domain containing 21 [Source:HGNC Symbol;Acc:HGNC:13083]	1.39181	0.0328135	UP
ENSOMYG00000058991	gatm	glycine amidinotransferase (L-arginine:glycine amidinotransferase) [Source:ZFIN;Acc:ZDB-GENE-021015-1]	1.38412	0.0234653	UP
ENSOMYG00000008702	trib3	tribbles pseudokinase 3 [Source:ZFIN;Acc:ZDB-GENE-040426-2609]	1.38312	0.0262921	UP
ENSOMYG00000072716	rcn1	reticulocalbin 1, EF-hand calcium binding domain [Source:ZFIN;Acc:ZDB-GENE-080225-33]	1.37679	0.0285931	UP
ENSOMYG00000031280	crebrf	creb3 regulatory factor [Source:ZFIN;Acc:ZDB-GENE-120203-3]	1.36723	0.030953	UP
ENSOMYG00000038152	ero1b	endoplasmic reticulum oxidoreductase 1 beta [Source:ZFIN;Acc:ZDB-GENE-060929-744]	1.36544	0.0384839	UP
ENSOMYG00000043353	socs2	suppressor of cytokine signaling 2 [Source:ZFIN;Acc:ZDB-GENE-041210-171]	1.35422	0.0181303	UP
ENSOMYG00000068149	frzb	frizzled related protein [Source:ZFIN;Acc:ZDB-GENE-990715-1]	1.32801	0.0204643	UP
ENSOMYG00000011845	alg1	ALG1 chitobiosyldiphosphodolichol beta-mannosyltransferase [Source:ZFIN;Acc:ZDB-GENE-030131-6093]	1.32548	0.0115527	UP
ENSOMYG00000008424	bcl2l1	BCL2 like 1 [Source:ZFIN;Acc:ZDB-GENE-010730-1]	1.2818	0.0480694	UP
ENSOMYG00000002596	serpine1	serpin peptidase inhibitor, clade E (nexin, plasminogen activator inhibitor type 1), member 1 [Source:ZFIN;Acc:ZDB-GENE-070912-60]	1.26648	0.023184	UP
ENSOMYG00000051025	dennd4a	DENN/MADD domain containing 4A [Source:ZFIN;Acc:ZDB-GENE-060503-285]	1.26153	0.0434329	UP
ENSOMYG00000016119	crebrf	creb3 regulatory factor [Source:ZFIN;Acc:ZDB-GENE-120203-3]	1.24353	0.0288033	UP
ENSOMYG00000038388	pdxp	pyridoxal (pyridoxine, vitamin B6) phosphatase [Source:ZFIN;Acc:ZDB-GENE-080723-69]	1.22488	0.0145914	UP
ENSOMYG00000046983	rgcc	regulator of cell cycle [Source:ZFIN;Acc:ZDB-GENE-040704-31]	1.22143	0.00060636	UP
ENSOMYG00000017134	ERO1B	endoplasmic reticulum oxidoreductase 1 beta [Source:HGNC Symbol;Acc:HGNC:14355]	1.21525	0.0101371	UP
ENSOMYG00000030043	s1pr1	sphingosine-1-phosphate receptor 1 [Source:ZFIN;Acc:ZDB-GENE-001228-2]	1.21173	0.0169263	UP
ENSOMYG00000031832	ADM2	adrenomedullin 2 [Source:HGNC Symbol;Acc:HGNC:28898]	1.2032	0.036202	UP
ENSOMYG00000036643	nox1	NADPH oxidase 1 [Source:ZFIN;Acc:ZDB-GENE-070404-1]	1.20051	0.00563568	UP
ENSOMYG00000027369	arid3b	AT-rich interactive domain 3B [Source:ZFIN;Acc:ZDB-GENE-070209-182]	1.19569	0.00328766	UP
ENSOMYG00000040019	srpra	SRP receptor subunit alpha [Source:ZFIN;Acc:ZDB-GENE-030219-11]	1.16576	0.0265618	UP
ENSOMYG00000046270	CREM	cAMP responsive element modulator [Source:HGNC Symbol;Acc:HGNC:2352]	1.16205	0.00124085	UP
ENSOMYG00000016793	myd88	MYD88 innate immune signal transduction adaptor [Source:ZFIN;Acc:ZDB-GENE-040219-3]	1.15348	0.0393736	UP
ENSOMYG00000046513	stx18	syntaxin 18 [Source:ZFIN;Acc:ZDB-GENE-050522-397]	1.13781	0.0429496	UP
ENSOMYG00000045223	GCN1	GCN1 activator of EIF2AK4 [Source:HGNC Symbol;Acc:HGNC:4199]	1.13251	0.0488806	UP
ENSOMYG00000023514	mapre2	microtubule-associated protein, RP/EB family, member 2 [Source:ZFIN;Acc:ZDB-GENE-071004-41]	1.12075	0.0139796	UP
ENSOMYG00000067017	mafk	v-maf avian musculoaponeurotic fibrosarcoma oncogene homolog K [Source:ZFIN;Acc:ZDB-GENE-040624-9]	1.11958	0.0166831	UP
ENSOMYG00000035628	TFB1M	transcription factor B1, mitochondrial [Source:HGNC Symbol;Acc:HGNC:17037]	1.11089	0.0184646	UP
ENSOMYG00000045181	npas2	neuronal PAS domain protein 2 [Source:ZFIN;Acc:ZDB-GENE-030408-3]	1.10964	0.0106861	UP
ENSOMYG00000000886	JUND	JunD proto-oncogene, AP-1 transcription factor subunit [Source:HGNC Symbol;Acc:HGNC:6206]	1.09612	0.0328893	UP
ENSOMYG00000023544	cebpd	CCAAT enhancer binding protein delta [Source:ZFIN;Acc:ZDB-GENE-020111-4]	1.07617	0.00199149	UP
ENSOMYG00000054802	tm9sf2	transmembrane 9 superfamily member 2 [Source:ZFIN;Acc:ZDB-GENE-030131-6302]	1.07324	7.70938e-05	UP
ENSOMYG00000062182	ACKR3	atypical chemokine receptor 3 [Source:HGNC Symbol;Acc:HGNC:23692]	1.07027	0.01051	UP
ENSOMYG00000053118	mecp2	methyl CpG binding protein 2 [Source:ZFIN;Acc:ZDB-GENE-030131-7190]	1.05925	0.00486705	UP
ENSOMYG00000028948	ift22	intraflagellar transport 22 homolog (Chlamydomonas) [Source:ZFIN;Acc:ZDB-GENE-050417-439]	1.05609	0.0140822	UP
ENSOMYG00000044727	CCN2	cellular communication network factor 2 [Source:HGNC Symbol;Acc:HGNC:2500]	1.04379	0.00112814	UP
ENSOMYG00000057861	mmp9	matrix metallopeptidase 9 [Source:ZFIN;Acc:ZDB-GENE-040426-2132]	1.04195	0.0146024	UP
ENSOMYG00000022630	egln2	egl-9 family hypoxia-inducible factor 2 [Source:ZFIN;Acc:ZDB-GENE-060503-757]	1.04075	0.000972701	UP
ENSOMYG00000041790	slc33a1	solute carrier family 33 member 1 [Source:ZFIN;Acc:ZDB-GENE-040426-1241]	1.012	0.000734346	UP
ENSOMYG00000034166	CDK4	cyclin dependent kinase 4 [Source:HGNC Symbol;Acc:HGNC:1773]	-1.00175	0.030593	DOWN
ENSOMYG00000038542	smc4	structural maintenance of chromosomes 4 [Source:ZFIN;Acc:ZDB-GENE-020419-21]	-1.02026	0.0345519	DOWN
ENSOMYG00000071329	mad2l1	MAD2 mitotic arrest deficient-like 1 (yeast) [Source:ZFIN;Acc:ZDB-GENE-030515-3]	-1.02077	0.0353231	DOWN
ENSOMYG00000000432	dhcr24	24-dehydrocholesterol reductase [Source:ZFIN;Acc:ZDB-GENE-041212-73]	-1.0241	1.38506e-06	DOWN
ENSOMYG00000016694	eif4e2	eukaryotic translation initiation factor 4E family member 2 [Source:ZFIN;Acc:ZDB-GENE-050327-59]	-1.02806	0.0222008	DOWN
ENSOMYG00000019528	SAMD11	sterile alpha motif domain containing 11 [Source:HGNC Symbol;Acc:HGNC:28706]	-1.0294	0.00992295	DOWN
ENSOMYG00000030222	ckap5	cytoskeleton associated protein 5 [Source:ZFIN;Acc:ZDB-GENE-051120-174]	-1.02997	0.00601569	DOWN
ENSOMYG00000012083	gch1	GTP cyclohydrolase 1 [Source:ZFIN;Acc:ZDB-GENE-070720-5]	-1.03297	0.00762754	DOWN
ENSOMYG00000074939	sfxn1	sideroflexin 1 [Source:ZFIN;Acc:ZDB-GENE-040801-45]	-1.04731	0.000142411	DOWN
ENSOMYG00000004457	anapc5	anaphase promoting complex subunit 5 [Source:ZFIN;Acc:ZDB-GENE-030131-1574]	-1.06464	0.0039416	DOWN
ENSOMYG00000008806	CSF1R	colony stimulating factor 1 receptor [Source:HGNC Symbol;Acc:HGNC:2433]	-1.06735	0.00288101	DOWN
ENSOMYG00000040505	cdca8	cell division cycle associated 8 [Source:ZFIN;Acc:ZDB-GENE-041114-171]	-1.068	0.0269457	DOWN
ENSOMYG00000012054	MARCO	macrophage receptor with collagenous structure [Source:HGNC Symbol;Acc:HGNC:6895]	-1.07716	0.0119723	DOWN
ENSOMYG00000026510	rbp4	retinol binding protein 4, plasma [Source:ZFIN;Acc:ZDB-GENE-000210-19]	-1.09514	0.000485851	DOWN
ENSOMYG00000036204	ciao1	cytosolic iron-sulfur assembly component 1 [Source:ZFIN;Acc:ZDB-GENE-040426-839]	-1.09694	0.0115487	DOWN
ENSOMYG00000035896	thoc3	THO complex 3 [Source:ZFIN;Acc:ZDB-GENE-040808-14]	-1.10893	0.0493702	DOWN
ENSOMYG00000045682	cenpf	centromere protein F [Source:ZFIN;Acc:ZDB-GENE-041111-205]	-1.11818	0.0287361	DOWN
ENSOMYG00000022859	S100P	S100 calcium binding protein P [Source:HGNC Symbol;Acc:HGNC:10504]	-1.1482	0.0196373	DOWN
ENSOMYG00000048455	fads2	fatty acid desaturase 2 [Source:ZFIN;Acc:ZDB-GENE-011212-1]	-1.14997	2.26646e-09	DOWN
ENSOMYG00000044822	map2k6	mitogen-activated protein kinase kinase 6 [Source:ZFIN;Acc:ZDB-GENE-010202-3]	-1.15793	0.0210443	DOWN
ENSOMYG00000006735	smo	smoothened, frizzled class receptor [Source:ZFIN;Acc:ZDB-GENE-980526-89]	-1.15864	0.0226179	DOWN
ENSOMYG00000018416	pbk	PDZ binding kinase [Source:ZFIN;Acc:ZDB-GENE-030523-2]	-1.16027	0.00210202	DOWN
ENSOMYG00000039655	raver1	ribonucleoprotein, PTB-binding 1 [Source:ZFIN;Acc:ZDB-GENE-050522-99]	-1.161	0.036005	DOWN
ENSOMYG00000011840	hmmr	hyaluronan-mediated motility receptor (RHAMM) [Source:ZFIN;Acc:ZDB-GENE-030131-731]	-1.16299	0.00200792	DOWN
ENSOMYG00000042181	mcm4	minichromosome maintenance complex component 4 [Source:ZFIN;Acc:ZDB-GENE-030131-9544]	-1.16703	0.000218877	DOWN
ENSOMYG00000011988	wdhd1	WD repeat and HMG-box DNA binding protein 1 [Source:ZFIN;Acc:ZDB-GENE-030131-1665]	-1.18274	0.0103173	DOWN
ENSOMYG00000011474	cd226	CD226 molecule [Source:ZFIN;Acc:ZDB-GENE-070112-1322]	-1.20798	0.0146727	DOWN
ENSOMYG00000005852	hells	helicase, lymphoid specific [Source:ZFIN;Acc:ZDB-GENE-030131-9923]	-1.21177	0.0010037	DOWN
ENSOMYG00000035643	npr3	natriuretic peptide receptor 3 [Source:ZFIN;Acc:ZDB-GENE-060531-91]	-1.22919	0.0159609	DOWN
ENSOMYG00000000722	chaf1a	chromatin assembly factor 1, subunit A (p150) [Source:ZFIN;Acc:ZDB-GENE-030131-5366]	-1.23102	0.00639443	DOWN
ENSOMYG00000036917	foxa1	forkhead box A1 [Source:ZFIN;Acc:ZDB-GENE-990415-78]	-1.24074	0.0170129	DOWN
ENSOMYG00000038605	IGF1	insulin like growth factor 1 [Source:HGNC Symbol;Acc:HGNC:5464]	-1.24265	0.0256357	DOWN
ENSOMYG00000000408	ndufb8	NADH:ubiquinone oxidoreductase subunit B8 [Source:ZFIN;Acc:ZDB-GENE-040426-1858]	-1.24533	0.00241943	DOWN
ENSOMYG00000042032	SNAI2	snail family transcriptional repressor 2 [Source:HGNC Symbol;Acc:HGNC:11094]	-1.26019	0.00435338	DOWN
ENSOMYG00000015503	RPE65	retinoid isomerohydrolase RPE65 [Source:HGNC Symbol;Acc:HGNC:10294]	-1.26103	0.00426143	DOWN
ENSOMYG00000045767	ido1	indoleamine 2,3-dioxygenase 1 [Source:ZFIN;Acc:ZDB-GENE-080228-2]	-1.26449	0.00549765	DOWN
ENSOMYG00000015092	cdkn3	cyclin dependent kinase inhibitor 3 [Source:ZFIN;Acc:ZDB-GENE-060427-2]	-1.26542	0.00187033	DOWN
ENSOMYG00000010238	aspm	assembly factor for spindle microtubules [Source:ZFIN;Acc:ZDB-GENE-050208-620]	-1.27096	0.00469942	DOWN
ENSOMYG00000038193	ST3GAL1	ST3 beta-galactoside alpha-2,3-sialyltransferase 1 [Source:HGNC Symbol;Acc:HGNC:10862]	-1.27525	0.0332679	DOWN
ENSOMYG00000048244	mki67	marker of proliferation Ki-67 [Source:ZFIN;Acc:ZDB-GENE-030131-9771]	-1.29242	0.0162136	DOWN
ENSOMYG00000045084	kif11	kinesin family member 11 [Source:ZFIN;Acc:ZDB-GENE-020426-1]	-1.29601	0.00667635	DOWN
ENSOMYG00000047080	BAIAP2	BAR/IMD domain containing adaptor protein 2 [Source:HGNC Symbol;Acc:HGNC:947]	-1.31076	0.0375437	DOWN
ENSOMYG00000001306	phf19	PHD finger protein 19 [Source:ZFIN;Acc:ZDB-GENE-081105-128]	-1.31963	0.00234746	DOWN
ENSOMYG00000009318	uhrf1	ubiquitin-like with PHD and ring finger domains 1 [Source:ZFIN;Acc:ZDB-GENE-040426-2039]	-1.32703	0.00129544	DOWN
ENSOMYG00000029797	hnf4a	hepatocyte nuclear factor 4, alpha [Source:ZFIN;Acc:ZDB-GENE-030131-1077]	-1.33032	0.0140709	DOWN
ENSOMYG00000006152	ncaph	non-SMC condensin I complex, subunit H [Source:ZFIN;Acc:ZDB-GENE-070112-652]	-1.34388	0.029438	DOWN
ENSOMYG00000003248	wfdc2	WAP four-disulfide core domain 2 [Source:ZFIN;Acc:ZDB-GENE-090313-47]	-1.34673	0.00882163	DOWN
ENSOMYG00000040361	CLSPN	claspin [Source:HGNC Symbol;Acc:HGNC:19715]	-1.35928	0.0292846	DOWN
ENSOMYG00000003398	psat1	phosphoserine aminotransferase 1 [Source:ZFIN;Acc:ZDB-GENE-030131-5723]	-1.39851	0.0147664	DOWN
ENSOMYG00000030943	blm	BLM RecQ like helicase [Source:ZFIN;Acc:ZDB-GENE-070702-5]	-1.41053	0.0197573	DOWN
ENSOMYG00000025741	kpna2	karyopherin alpha 2 (RAG cohort 1, importin alpha 1) [Source:ZFIN;Acc:ZDB-GENE-040718-22]	-1.42914	0.00456343	DOWN
ENSOMYG00000020212	RYR3	ryanodine receptor 3 [Source:HGNC Symbol;Acc:HGNC:10485]	-1.44019	0.00467771	DOWN
ENSOMYG00000044801	cdc20	cell division cycle 20 homolog [Source:ZFIN;Acc:ZDB-GENE-040426-2044]	-1.44499	0.00389636	DOWN
ENSOMYG00000044997	aaas	achalasia, adrenocortical insufficiency, alacrimia [Source:ZFIN;Acc:ZDB-GENE-030912-4]	-1.45423	0.00377978	DOWN
ENSOMYG00000018528	krt5	keratin 5 [Source:ZFIN;Acc:ZDB-GENE-991110-23]	-1.47173	0.0128764	DOWN
ENSOMYG00000004180	tfap2a	transcription factor AP-2 alpha [Source:ZFIN;Acc:ZDB-GENE-011212-6]	-1.47236	0.0354263	DOWN
ENSOMYG00000043188	cytip	cytohesin 1 interacting protein [Source:ZFIN;Acc:ZDB-GENE-140106-76]	-1.48592	0.000292299	DOWN
ENSOMYG00000029603	dio2	iodothyronine deiodinase 2 [Source:ZFIN;Acc:ZDB-GENE-030327-4]	-1.50542	0.000859116	DOWN
ENSOMYG00000027207	cdc45	CDC45 cell division cycle 45 homolog (S. cerevisiae) [Source:ZFIN;Acc:ZDB-GENE-040426-2710]	-1.5134	0.00341534	DOWN
ENSOMYG00000013593	e2f8	E2F transcription factor 8 [Source:ZFIN;Acc:ZDB-GENE-041111-260]	-1.51704	7.3661e-05	DOWN
ENSOMYG00000047763	G6PC2	glucose-6-phosphatase catalytic subunit 2 [Source:HGNC Symbol;Acc:HGNC:28906]	-1.52248	0.0158639	DOWN
ENSOMYG00000010296	exo1	exonuclease 1 [Source:ZFIN;Acc:ZDB-GENE-040426-2828]	-1.52463	0.000469065	DOWN
ENSOMYG00000016252	ddc	dopa decarboxylase [Source:ZFIN;Acc:ZDB-GENE-040426-2656]	-1.53241	0.0191888	DOWN
ENSOMYG00000036854	faslg	Fas ligand (TNF superfamily, member 6) [Source:ZFIN;Acc:ZDB-GENE-070410-16]	-1.53325	0.0429035	DOWN
ENSOMYG00000042158	btc	betacellulin, epidermal growth factor family member [Source:ZFIN;Acc:ZDB-GENE-050311-1]	-1.54093	0.00499606	DOWN
ENSOMYG00000033266	ano6	anoctamin 6 [Source:ZFIN;Acc:ZDB-GENE-081104-64]	-1.54735	0.0114119	DOWN
ENSOMYG00000029486	msh6	mutS homolog 6 (E. coli) [Source:ZFIN;Acc:ZDB-GENE-020905-3]	-1.57045	0.0258698	DOWN
ENSOMYG00000045037	cdk1	cyclin dependent kinase 1 [Source:ZFIN;Acc:ZDB-GENE-010320-1]	-1.58797	0.0200241	DOWN
ENSOMYG00000039505	KIF23	kinesin family member 23 [Source:HGNC Symbol;Acc:HGNC:6392]	-1.59008	0.043396	DOWN
ENSOMYG00000023590	KIF20A	kinesin family member 20A [Source:HGNC Symbol;Acc:HGNC:9787]	-1.59897	0.0328403	DOWN
ENSOMYG00000047551	pbk	PDZ binding kinase [Source:ZFIN;Acc:ZDB-GENE-030523-2]	-1.62607	0.0273857	DOWN
ENSOMYG00000003321	cdc6	cell division cycle 6 homolog (S. cerevisiae) [Source:ZFIN;Acc:ZDB-GENE-050506-131]	-1.62923	0.000319478	DOWN
ENSOMYG00000032542	ect2	epithelial cell transforming 2 [Source:ZFIN;Acc:ZDB-GENE-040831-2]	-1.65775	0.00207785	DOWN
ENSOMYG00000022268	mad2l1	MAD2 mitotic arrest deficient-like 1 (yeast) [Source:ZFIN;Acc:ZDB-GENE-030515-3]	-1.66325	0.0149797	DOWN
ENSOMYG00000037774	TRAF5	TNF receptor associated factor 5 [Source:HGNC Symbol;Acc:HGNC:12035]	-1.71182	0.00451875	DOWN
ENSOMYG00000057661	cdca5	cell division cycle associated 5 [Source:ZFIN;Acc:ZDB-GENE-030131-235]	-1.73494	0.0417292	DOWN
ENSOMYG00000046774	KIF20A	kinesin family member 20A [Source:HGNC Symbol;Acc:HGNC:9787]	-1.76039	0.00369107	DOWN
ENSOMYG00000039583	ccnb1	cyclin B1 [Source:ZFIN;Acc:ZDB-GENE-000406-10]	-1.76052	7.31243e-05	DOWN
ENSOMYG00000022421	spc24	SPC24 component of NDC80 kinetochore complex [Source:ZFIN;Acc:ZDB-GENE-050522-456]	-1.7926	0.0393332	DOWN
ENSOMYG00000047004	gins4	GINS complex subunit 4 (Sld5 homolog) [Source:ZFIN;Acc:ZDB-GENE-040801-59]	-1.82935	0.00187137	DOWN
ENSOMYG00000038123	ttk	ttk protein kinase [Source:ZFIN;Acc:ZDB-GENE-030123-1]	-1.8573	0.000764951	DOWN
ENSOMYG00000035594	vrk1	VRK serine/threonine kinase 1 [Source:ZFIN;Acc:ZDB-GENE-040426-2709]	-1.85998	0.00138587	DOWN
ENSOMYG00000042429	lck	LCK proto-oncogene, Src family tyrosine kinase [Source:ZFIN;Acc:ZDB-GENE-040617-1]	-1.87136	0.01979	DOWN
ENSOMYG00000029971	kpna2	karyopherin alpha 2 (RAG cohort 1, importin alpha 1) [Source:ZFIN;Acc:ZDB-GENE-040718-22]	-1.87584	3.06383e-05	DOWN
ENSOMYG00000043170	RRM2	ribonucleotide reductase regulatory subunit M2 [Source:HGNC Symbol;Acc:HGNC:10452]	-1.88628	0.00202205	DOWN
ENSOMYG00000028291	trip13	thyroid hormone receptor interactor 13 [Source:ZFIN;Acc:ZDB-GENE-040426-1488]	-1.89831	0.00346278	DOWN
ENSOMYG00000010384	gins4	GINS complex subunit 4 (Sld5 homolog) [Source:ZFIN;Acc:ZDB-GENE-040801-59]	-1.90113	0.00992525	DOWN
ENSOMYG00000041856	cdk1	cyclin dependent kinase 1 [Source:ZFIN;Acc:ZDB-GENE-010320-1]	-1.95013	0.0248652	DOWN
ENSOMYG00000069397	mcm3	minichromosome maintenance complex component 3 [Source:ZFIN;Acc:ZDB-GENE-020419-4]	-1.9845	0.00163306	DOWN
ENSOMYG00000029221	mcm5	minichromosome maintenance complex component 5 [Source:ZFIN;Acc:ZDB-GENE-021209-1]	-1.99016	0.00156607	DOWN
ENSOMYG00000017817	cdc6	cell division cycle 6 homolog (S. cerevisiae) [Source:ZFIN;Acc:ZDB-GENE-050506-131]	-2.00274	0.00754196	DOWN
ENSOMYG00000019951	cdt1	chromatin licensing and DNA replication factor 1 [Source:ZFIN;Acc:ZDB-GENE-070111-1]	-2.00906	0.000191041	DOWN
ENSOMYG00000008695	sox12	SRY-box transcription factor 12 [Source:ZFIN;Acc:ZDB-GENE-040724-33]	-2.01093	0.0340301	DOWN
ENSOMYG00000047653	ccnb1	cyclin B1 [Source:ZFIN;Acc:ZDB-GENE-000406-10]	-2.01169	0.0188659	DOWN
ENSOMYG00000041944	kif11	kinesin family member 11 [Source:ZFIN;Acc:ZDB-GENE-020426-1]	-2.014	0.00506025	DOWN
ENSOMYG00000054974	cks2	CDC28 protein kinase regulatory subunit 2 [Source:ZFIN;Acc:ZDB-GENE-050208-508]	-2.02648	0.0202831	DOWN
ENSOMYG00000041834	pif1	PIF1 5'-to-3' DNA helicase homolog (S. cerevisiae) [Source:ZFIN;Acc:ZDB-GENE-030131-4928]	-2.04898	0.0130437	DOWN
ENSOMYG00000033325	mcm2	minichromosome maintenance complex component 2 [Source:ZFIN;Acc:ZDB-GENE-020419-24]	-2.08867	9.23011e-05	DOWN
ENSOMYG00000031800	mcm2	minichromosome maintenance complex component 2 [Source:ZFIN;Acc:ZDB-GENE-020419-24]	-2.10472	5.05976e-05	DOWN
ENSOMYG00000034475	CCNA2	cyclin A2 [Source:HGNC Symbol;Acc:HGNC:1578]	-2.11295	0.00168168	DOWN
ENSOMYG00000053448	cks2	CDC28 protein kinase regulatory subunit 2 [Source:ZFIN;Acc:ZDB-GENE-050208-508]	-2.13704	0.027039	DOWN
ENSOMYG00000017239	e2f7	E2F transcription factor 7 [Source:ZFIN;Acc:ZDB-GENE-030131-3527]	-2.14645	0.00266532	DOWN
ENSOMYG00000022528	mcm5	minichromosome maintenance complex component 5 [Source:ZFIN;Acc:ZDB-GENE-021209-1]	-2.21928	3.04188e-09	DOWN
ENSOMYG00000019518	NASP	nuclear autoantigenic sperm protein [Source:HGNC Symbol;Acc:HGNC:7644]	-2.23963	0.00184634	DOWN
ENSOMYG00000022980	dio2	iodothyronine deiodinase 2 [Source:ZFIN;Acc:ZDB-GENE-030327-4]	-2.2709	2.72497e-09	DOWN
ENSOMYG00000036024	pitx2	paired-like homeodomain 2 [Source:ZFIN;Acc:ZDB-GENE-990714-27]	-2.29809	0.0177704	DOWN
ENSOMYG00000021668	spp1	secreted phosphoprotein 1 [Source:ZFIN;Acc:ZDB-GENE-050706-97]	-2.30978	0.0339097	DOWN
ENSOMYG00000037794	cenpx	centromere protein X [Source:ZFIN;Acc:ZDB-GENE-110411-78]	-2.34388	2.00854e-05	DOWN
ENSOMYG00000018441	chaf1b	chromatin assembly factor 1, subunit B [Source:ZFIN;Acc:ZDB-GENE-040426-1947]	-2.40495	5.84528e-05	DOWN
ENSOMYG00000034605	bfsp2	beaded filament structural protein 2, phakinin [Source:ZFIN;Acc:ZDB-GENE-041212-58]	-2.43366	0.0406874	DOWN
ENSOMYG00000070417	dnase1	deoxyribonuclease I [Source:ZFIN;Acc:ZDB-GENE-040718-423]	-2.4678	0.0402441	DOWN
ENSOMYG00000020121	SLC25A19	solute carrier family 25 member 19 [Source:HGNC Symbol;Acc:HGNC:14409]	-2.52254	0.014536	DOWN
ENSOMYG00000041456	raly	RALY heterogeneous nuclear ribonucleoprotein [Source:ZFIN;Acc:ZDB-GENE-041010-127]	-2.58046	0.0241459	DOWN
ENSOMYG00000013814	ddc	dopa decarboxylase [Source:ZFIN;Acc:ZDB-GENE-040426-2656]	-2.75702	0.000763105	DOWN
ENSOMYG00000031865	rad54l	RAD54 like [Source:ZFIN;Acc:ZDB-GENE-040426-968]	-2.76298	1.01489e-05	DOWN
ENSOMYG00000011223	DLK1	delta like non-canonical Notch ligand 1 [Source:HGNC Symbol;Acc:HGNC:2907]	-2.78574	0.0445703	DOWN
ENSOMYG00000032775	KCTD15	potassium channel tetramerization domain containing 15 [Source:HGNC Symbol;Acc:HGNC:23297]	-2.79446	0.0333343	DOWN
ENSOMYG00000040044	med20	mediator complex subunit 20 [Source:ZFIN;Acc:ZDB-GENE-040801-104]	-2.81057	0.00912682	DOWN
ENSOMYG00000041903	mis12	MIS12 kinetochore complex component [Source:ZFIN;Acc:ZDB-GENE-040426-1372]	-2.9881	0.000449048	DOWN
ENSOMYG00000016848	MIR150	microRNA 150 [Source:HGNC Symbol;Acc:HGNC:31537]	-3.22773	0.0336435	DOWN
ENSOMYG00000044234	BCAT1	branched chain amino acid transaminase 1 [Source:HGNC Symbol;Acc:HGNC:976]	-3.36124	0.00486228	DOWN
ENSOMYG00000005651	dnase1	deoxyribonuclease I [Source:ZFIN;Acc:ZDB-GENE-040718-423]	-3.40528	0.017079	DOWN
ENSOMYG00000013490	p2rx2	purinergic receptor P2X, ligand-gated ion channel, 2 [Source:ZFIN;Acc:ZDB-GENE-030319-2]	-4.13413	0.0361364	DOWN
ENSOMYG00000060656	HTR2A	5-hydroxytryptamine receptor 2A [Source:HGNC Symbol;Acc:HGNC:5293]	-4.17121	0.00842479	DOWN
ENSOMYG00000024041	MIR125B1	microRNA 125b-1 [Source:HGNC Symbol;Acc:HGNC:31506]	-4.38342	0.0117607	DOWN
ENSOMYG00000038532	ush1c	Usher syndrome 1C [Source:ZFIN;Acc:ZDB-GENE-060312-41]	-4.43524	0.0117157	DOWN
ENSOMYG00000020181	nppb	natriuretic peptide B [Source:ZFIN;Acc:ZDB-GENE-130530-642]	-4.50346	0.01747	DOWN
ENSOMYG00000034062	optc	opticin [Source:ZFIN;Acc:ZDB-GENE-030131-1798]	-4.50346	0.01747	DOWN
ENSOMYG00000069209	MIR23A	microRNA 23a [Source:HGNC Symbol;Acc:HGNC:31605]	-4.52248	0.00866593	DOWN
ENSOMYG00000000651	hsf4	heat shock transcription factor 4 [Source:ZFIN;Acc:ZDB-GENE-050306-18]	-4.55593	0.00721815	DOWN
ENSOMYG00000020940	pgm3	phosphoglucomutase 3 [Source:ZFIN;Acc:ZDB-GENE-041024-13]	-4.64298	0.00580498	DOWN
ENSOMYG00000000542	LIN28B	lin-28 homolog B [Source:HGNC Symbol;Acc:HGNC:32207]	-4.65868	0.00628459	DOWN
ENSOMYG00000003145	cryba4	crystallin, beta A4 [Source:ZFIN;Acc:ZDB-GENE-050522-143]	-5.48497	7.34676e-05	DOWN

## Sheet: DEGs_Hypoxia_Datasets
Supplemetary Tabel S4E: Differentilly expressed upregulated and downregulated genes of combined hypxoia stress datasets.
Gene_ID	Gene_Symbol	Gene_Description	log2FoldChange	adjusted.P.Value	Regulation
ENSOMYG00000010447	hspa1b	heat shock protein family A (Hsp70) member 1B [Source:ZFIN;Acc:ZDB-GENE-060503-867]	8.13459	0.0412752	UP
ENSOMYG00000034757	hspa4l	heat shock protein 4 like [Source:ZFIN;Acc:ZDB-GENE-030131-2412]	7.41921	0.0446925	UP
ENSOMYG00000023837	HTR1B	5-hydroxytryptamine receptor 1B [Source:HGNC Symbol;Acc:HGNC:5287]	7.00009	0.000400397	UP
ENSOMYG00000036455	trpc3	transient receptor potential cation channel, subfamily C, member 3 [Source:ZFIN;Acc:ZDB-GENE-140129-1]	6.61812	2.103e-07	UP
ENSOMYG00000018660	casq2	calsequestrin 2 [Source:ZFIN;Acc:ZDB-GENE-010724-12]	6.41662	4.40883e-05	UP
ENSOMYG00000032225	hk2	hexokinase 2 [Source:ZFIN;Acc:ZDB-GENE-040426-2017]	5.8329	0.000132129	UP
ENSOMYG00000015551	CA12	carbonic anhydrase 12 [Source:HGNC Symbol;Acc:HGNC:1371]	5.63799	0.00102139	UP
ENSOMYG00000037923	HTR3A	5-hydroxytryptamine receptor 3A [Source:HGNC Symbol;Acc:HGNC:5297]	5.41314	0.000221613	UP
ENSOMYG00000032181	TNNT2	troponin T2, cardiac type [Source:HGNC Symbol;Acc:HGNC:11949]	5.25264	0.000286249	UP
ENSOMYG00000030883	CDH10	cadherin 10 [Source:HGNC Symbol;Acc:HGNC:1749]	5.2438	0.00303032	UP
ENSOMYG00000049908	SLC9A5	solute carrier family 9 member A5 [Source:HGNC Symbol;Acc:HGNC:11078]	5.13982	0.000100651	UP
ENSOMYG00000021533	GCG	glucagon [Source:HGNC Symbol;Acc:HGNC:4191]	5.1285	0.000145407	UP
ENSOMYG00000041216	ccnh	cyclin H [Source:ZFIN;Acc:ZDB-GENE-050320-13]	5.0399	0.000775928	UP
ENSOMYG00000019093	KCNK2	potassium two pore domain channel subfamily K member 2 [Source:HGNC Symbol;Acc:HGNC:6277]	4.99149	0.000223402	UP
ENSOMYG00000021564	zcchc14	zinc finger, CCHC domain containing 14 [Source:ZFIN;Acc:ZDB-GENE-060503-319]	4.96197	0.00111089	UP
ENSOMYG00000016047	asz1	ankyrin repeat, SAM and basic leucine zipper domain containing 1 [Source:ZFIN;Acc:ZDB-GENE-040426-988]	4.93298	0.00250901	UP
ENSOMYG00000054038	slc6a3	solute carrier family 6 member 3 [Source:ZFIN;Acc:ZDB-GENE-010316-1]	4.86861	0.00128554	UP
ENSOMYG00000001367	gabrb3	gamma-aminobutyric acid type A receptor subunit beta3 [Source:ZFIN;Acc:ZDB-GENE-101102-2]	4.79283	0.00105668	UP
ENSOMYG00000065868	ahcy	adenosylhomocysteinase [Source:ZFIN;Acc:ZDB-GENE-031219-6]	4.76944	0.000316437	UP
ENSOMYG00000003894	GPR61	G protein-coupled receptor 61 [Source:HGNC Symbol;Acc:HGNC:13300]	4.62652	2.31325e-05	UP
ENSOMYG00000030588	KCNMB4	potassium calcium-activated channel subfamily M regulatory beta subunit 4 [Source:HGNC Symbol;Acc:HGNC:6289]	4.40047	0.00130551	UP
ENSOMYG00000073725	wnt1	wingless-type MMTV integration site family, member 1 [Source:ZFIN;Acc:ZDB-GENE-980526-526]	4.36991	0.0232694	UP
ENSOMYG00000012135	DGKB	diacylglycerol kinase beta [Source:HGNC Symbol;Acc:HGNC:2850]	4.24595	4.42676e-12	UP
ENSOMYG00000040697	lrrc47	leucine rich repeat containing 47 [Source:ZFIN;Acc:ZDB-GENE-060503-289]	4.09952	0.0228427	UP
ENSOMYG00000063943	CLCA1	chloride channel accessory 1 [Source:HGNC Symbol;Acc:HGNC:2015]	4.05965	0.0407359	UP
ENSOMYG00000004532	grm3	glutamate receptor, metabotropic 3 [Source:ZFIN;Acc:ZDB-GENE-061009-13]	3.73345	0.0318232	UP
ENSOMYG00000014190	ARF3	ADP ribosylation factor 3 [Source:HGNC Symbol;Acc:HGNC:654]	3.64892	0.0179715	UP
ENSOMYG00000032851	nr4a1	nuclear receptor subfamily 4, group A, member 1 [Source:ZFIN;Acc:ZDB-GENE-040704-11]	3.63961	0.0388466	UP
ENSOMYG00000042950	bag3	BCL2 associated athanogene 3 [Source:ZFIN;Acc:ZDB-GENE-040801-40]	3.61611	0.0392651	UP
ENSOMYG00000062799	scg3	secretogranin III [Source:ZFIN;Acc:ZDB-GENE-040426-1725]	3.50385	0.00373112	UP
ENSOMYG00000031235	MIR146B	microRNA 146b [Source:HGNC Symbol;Acc:HGNC:32079]	3.38446	0.00248561	UP
ENSOMYG00000060655	KBTBD13	kelch repeat and BTB domain containing 13 [Source:HGNC Symbol;Acc:HGNC:37227]	3.35764	0.0316325	UP
ENSOMYG00000016715	MYH6	myosin heavy chain 6 [Source:HGNC Symbol;Acc:HGNC:7576]	3.35104	2.64685e-05	UP
ENSOMYG00000012048	EN1	engrailed homeobox 1 [Source:HGNC Symbol;Acc:HGNC:3342]	3.27068	0.00232226	UP
ENSOMYG00000034531	CREM	cAMP responsive element modulator [Source:HGNC Symbol;Acc:HGNC:2352]	3.21936	0.0490991	UP
ENSOMYG00000000213	pip5kl1	phosphatidylinositol-4-phosphate 5-kinase-like 1 [Source:ZFIN;Acc:ZDB-GENE-060526-248]	3.17434	1.1563e-07	UP
ENSOMYG00000014709	RGS2	regulator of G protein signaling 2 [Source:HGNC Symbol;Acc:HGNC:9998]	3.13644	0.00831741	UP
ENSOMYG00000011303	mb	myoglobin [Source:ZFIN;Acc:ZDB-GENE-040426-1430]	3.02354	0.0122442	UP
ENSOMYG00000035608	esrrb	estrogen-related receptor beta [Source:ZFIN;Acc:ZDB-GENE-040616-2]	2.95259	0.00424011	UP
ENSOMYG00000004613	USP50	ubiquitin specific peptidase 50 [Source:HGNC Symbol;Acc:HGNC:20079]	2.90109	0.0104897	UP
ENSOMYG00000009309	ST3GAL1	ST3 beta-galactoside alpha-2,3-sialyltransferase 1 [Source:HGNC Symbol;Acc:HGNC:10862]	2.8995	0.0486345	UP
ENSOMYG00000022744	MYBPC3	myosin binding protein C3 [Source:HGNC Symbol;Acc:HGNC:7551]	2.76487	0.00247849	UP
ENSOMYG00000000925	ddit4	DNA-damage-inducible transcript 4 [Source:ZFIN;Acc:ZDB-GENE-031002-35]	2.75097	0.00707842	UP
ENSOMYG00000037528	MAFG	MAF bZIP transcription factor G [Source:HGNC Symbol;Acc:HGNC:6781]	2.70562	0.0342713	UP
ENSOMYG00000000567	TPH1	tryptophan hydroxylase 1 (tryptophan 5-monooxygenase) a [Source:ZFIN;Acc:ZDB-GENE-030317-1]	2.66151	0.000156433	UP
ENSOMYG00000027025	GJA3	gap junction protein alpha 3 [Source:HGNC Symbol;Acc:HGNC:4277]	2.6596	0.00389253	UP
ENSOMYG00000005425	plek2	pleckstrin 2 [Source:ZFIN;Acc:ZDB-GENE-080219-2]	2.59057	0.0369222	UP
ENSOMYG00000010194	fkbp5	FKBP prolyl isomerase 5 [Source:ZFIN;Acc:ZDB-GENE-030616-630]	2.52239	0.0340054	UP
ENSOMYG00000014149	casq2	calsequestrin 2 [Source:ZFIN;Acc:ZDB-GENE-010724-12]	2.48924	0.0113688	UP
ENSOMYG00000040968	ctsc	cathepsin C [Source:ZFIN;Acc:ZDB-GENE-030619-9]	2.43766	0.0419329	UP
ENSOMYG00000041329	MXI1	MAX interactor 1, dimerization protein [Source:HGNC Symbol;Acc:HGNC:7534]	2.42094	0.00582108	UP
ENSOMYG00000020125	nr4a1	nuclear receptor subfamily 4, group A, member 1 [Source:ZFIN;Acc:ZDB-GENE-040704-11]	2.40378	0.0415658	UP
ENSOMYG00000016183	ptn	pleiotrophin [Source:ZFIN;Acc:ZDB-GENE-030624-1]	2.36752	0.00747063	UP
ENSOMYG00000016957	nr4a3	nuclear receptor subfamily 4, group A, member 3 [Source:ZFIN;Acc:ZDB-GENE-070824-4]	2.30676	4.14961e-05	UP
ENSOMYG00000039537	ZBTB21	zinc finger and BTB domain containing 21 [Source:HGNC Symbol;Acc:HGNC:13083]	2.30494	0.00555116	UP
ENSOMYG00000018467	EGLN3	egl-9 family hypoxia inducible factor 3 [Source:HGNC Symbol;Acc:HGNC:14661]	2.29453	1.0685e-05	UP
ENSOMYG00000068030	ddit4	DNA-damage-inducible transcript 4 [Source:ZFIN;Acc:ZDB-GENE-031002-35]	2.23093	0.00746566	UP
ENSOMYG00000037566	pgr	progesterone receptor [Source:ZFIN;Acc:ZDB-GENE-990415-214]	2.21707	0.000593798	UP
ENSOMYG00000020277	pfkfb3	6-phosphofructo-2-kinase/fructose-2,6-biphosphatase 3 [Source:ZFIN;Acc:ZDB-GENE-040426-2724]	2.17962	0.00591767	UP
ENSOMYG00000069516	hspa13	heat shock protein 70 family, member 13 [Source:ZFIN;Acc:ZDB-GENE-070410-58]	2.13686	0.0249049	UP
ENSOMYG00000041283	p4ha2	procollagen-proline, 2-oxoglutarate 4-dioxygenase (proline 4-hydroxylase), alpha polypeptide 2 [Source:ZFIN;Acc:ZDB-GENE-030827-1]	2.09354	0.00841561	UP
ENSOMYG00000012103	pcsk1	proprotein convertase subtilisin/kexin type 1 [Source:ZFIN;Acc:ZDB-GENE-071009-1]	2.07419	0.00104232	UP
ENSOMYG00000056982	nr4a3	nuclear receptor subfamily 4, group A, member 3 [Source:ZFIN;Acc:ZDB-GENE-070824-4]	2.02525	0.000413871	UP
ENSOMYG00000026585	ero1a	endoplasmic reticulum oxidoreductase 1 alpha [Source:ZFIN;Acc:ZDB-GENE-040426-1312]	2.02338	1.39422e-07	UP
ENSOMYG00000037257	slc8a3	solute carrier family 8 member 3 [Source:ZFIN;Acc:ZDB-GENE-050810-1]	1.96288	0.0169444	UP
ENSOMYG00000046233	fkbp5	FKBP prolyl isomerase 5 [Source:ZFIN;Acc:ZDB-GENE-030616-630]	1.95448	2.99744e-05	UP
ENSOMYG00000031231	GADD45B	growth arrest and DNA damage inducible beta [Source:HGNC Symbol;Acc:HGNC:4096]	1.93484	0.00340022	UP
ENSOMYG00000045812	hspa13	heat shock protein 70 family, member 13 [Source:ZFIN;Acc:ZDB-GENE-070410-58]	1.89617	0.0184428	UP
ENSOMYG00000073963	alg1	ALG1 chitobiosyldiphosphodolichol beta-mannosyltransferase [Source:ZFIN;Acc:ZDB-GENE-030131-6093]	1.8213	0.00102491	UP
ENSOMYG00000040066	slc7a5	solute carrier family 7 member 5 [Source:ZFIN;Acc:ZDB-GENE-080818-4]	1.81365	0.0011003	UP
ENSOMYG00000069831	manf	mesencephalic astrocyte-derived neurotrophic factor [Source:ZFIN;Acc:ZDB-GENE-060929-640]	1.77638	0.0395433	UP
ENSOMYG00000023975	eif2ak3	eukaryotic translation initiation factor 2-alpha kinase 3 [Source:ZFIN;Acc:ZDB-GENE-050414-2]	1.74802	0.00628241	UP
ENSOMYG00000049204	PPP2R2C	protein phosphatase 2 regulatory subunit Bgamma [Source:HGNC Symbol;Acc:HGNC:9306]	1.72341	0.010725	UP
ENSOMYG00000033281	nfatc1	nuclear factor of activated T cells 1 [Source:ZFIN;Acc:ZDB-GENE-060503-677]	1.69208	0.00090976	UP
ENSOMYG00000034782	tert	telomerase reverse transcriptase [Source:ZFIN;Acc:ZDB-GENE-080405-1]	1.67611	0.0341223	UP
ENSOMYG00000017399	JUNB	JunB proto-oncogene, AP-1 transcription factor subunit [Source:HGNC Symbol;Acc:HGNC:6205]	1.59688	0.0376917	UP
ENSOMYG00000058535	socs2	suppressor of cytokine signaling 2 [Source:ZFIN;Acc:ZDB-GENE-041210-171]	1.59405	0.0209651	UP
ENSOMYG00000031942	ddx5	DEAD (Asp-Glu-Ala-Asp) box helicase 5 [Source:ZFIN;Acc:ZDB-GENE-030131-925]	1.57347	0.0139476	UP
ENSOMYG00000028099	bag4	BCL2 associated athanogene 4 [Source:ZFIN;Acc:ZDB-GENE-030131-5484]	1.56758	0.022095	UP
ENSOMYG00000027040	RPE65	retinoid isomerohydrolase RPE65 [Source:HGNC Symbol;Acc:HGNC:10294]	1.55367	0.0117185	UP
ENSOMYG00000037334	arg2	arginase 2 [Source:ZFIN;Acc:ZDB-GENE-030131-1334]	1.52694	0.00684345	UP
ENSOMYG00000041476	ndufaf4	NADH:ubiquinone oxidoreductase complex assembly factor 4 [Source:ZFIN;Acc:ZDB-GENE-060810-114]	1.51687	0.0242444	UP
ENSOMYG00000008788	mfsd13a	major facilitator superfamily domain containing 13A [Source:ZFIN;Acc:ZDB-GENE-041212-83]	1.51326	0.00481709	UP
ENSOMYG00000003084	ATP11A	ATPase phospholipid transporting 11A [Source:HGNC Symbol;Acc:HGNC:13552]	1.50994	0.0115895	UP
ENSOMYG00000055945	kcnj8	potassium inwardly rectifying channel subfamily J member 8 [Source:ZFIN;Acc:ZDB-GENE-060308-1]	1.50578	0.000202918	UP
ENSOMYG00000063206	ccn5	cellular communication network factor 5 [Source:ZFIN;Acc:ZDB-GENE-060223-1]	1.48878	0.00699692	UP
ENSOMYG00000041794	serpine1	serpin peptidase inhibitor, clade E (nexin, plasminogen activator inhibitor type 1), member 1 [Source:ZFIN;Acc:ZDB-GENE-070912-60]	1.44503	1.34302e-05	UP
ENSOMYG00000022652	slc1a5	solute carrier family 1 member 5 [Source:ZFIN;Acc:ZDB-GENE-070501-4]	1.43657	0.00163618	UP
ENSOMYG00000043585	etfa	electron transfer flavoprotein subunit alpha [Source:ZFIN;Acc:ZDB-GENE-030131-4449]	1.42854	0.0473094	UP
ENSOMYG00000017847	KCNN1	potassium calcium-activated channel subfamily N member 1 [Source:HGNC Symbol;Acc:HGNC:6290]	1.42392	0.0233004	UP
ENSOMYG00000012434	CREM	cAMP responsive element modulator [Source:HGNC Symbol;Acc:HGNC:2352]	1.41616	1.17272e-07	UP
ENSOMYG00000042667	cebpd	CCAAT enhancer binding protein delta [Source:ZFIN;Acc:ZDB-GENE-020111-4]	1.40353	1.32382e-06	UP
ENSOMYG00000000538	bnip3	BCL2 interacting protein 3 [Source:ZFIN;Acc:ZDB-GENE-030131-8060]	1.39848	0.034899	UP
ENSOMYG00000029048	slc1a5	solute carrier family 1 member 5 [Source:ZFIN;Acc:ZDB-GENE-070501-4]	1.39736	0.000155266	UP
ENSOMYG00000022190	ZBTB21	zinc finger and BTB domain containing 21 [Source:HGNC Symbol;Acc:HGNC:13083]	1.39181	0.0328135	UP
ENSOMYG00000058991	gatm	glycine amidinotransferase (L-arginine:glycine amidinotransferase) [Source:ZFIN;Acc:ZDB-GENE-021015-1]	1.38412	0.0234653	UP
ENSOMYG00000008702	trib3	tribbles pseudokinase 3 [Source:ZFIN;Acc:ZDB-GENE-040426-2609]	1.38312	0.0262921	UP
ENSOMYG00000072716	rcn1	reticulocalbin 1, EF-hand calcium binding domain [Source:ZFIN;Acc:ZDB-GENE-080225-33]	1.37679	0.0285931	UP
ENSOMYG00000031280	crebrf	creb3 regulatory factor [Source:ZFIN;Acc:ZDB-GENE-120203-3]	1.36723	0.030953	UP
ENSOMYG00000038152	ero1b	endoplasmic reticulum oxidoreductase 1 beta [Source:ZFIN;Acc:ZDB-GENE-060929-744]	1.36544	0.0384839	UP
ENSOMYG00000043353	socs2	suppressor of cytokine signaling 2 [Source:ZFIN;Acc:ZDB-GENE-041210-171]	1.35422	0.0181303	UP
ENSOMYG00000068149	frzb	frizzled related protein [Source:ZFIN;Acc:ZDB-GENE-990715-1]	1.32801	0.0204643	UP
ENSOMYG00000011845	alg1	ALG1 chitobiosyldiphosphodolichol beta-mannosyltransferase [Source:ZFIN;Acc:ZDB-GENE-030131-6093]	1.32548	0.0115527	UP
ENSOMYG00000008424	bcl2l1	BCL2 like 1 [Source:ZFIN;Acc:ZDB-GENE-010730-1]	1.2818	0.0480694	UP
ENSOMYG00000002596	serpine1	serpin peptidase inhibitor, clade E (nexin, plasminogen activator inhibitor type 1), member 1 [Source:ZFIN;Acc:ZDB-GENE-070912-60]	1.26648	0.023184	UP
ENSOMYG00000051025	dennd4a	DENN/MADD domain containing 4A [Source:ZFIN;Acc:ZDB-GENE-060503-285]	1.26153	0.0434329	UP
ENSOMYG00000016119	crebrf	creb3 regulatory factor [Source:ZFIN;Acc:ZDB-GENE-120203-3]	1.24353	0.0288033	UP
ENSOMYG00000038388	pdxp	pyridoxal (pyridoxine, vitamin B6) phosphatase [Source:ZFIN;Acc:ZDB-GENE-080723-69]	1.22488	0.0145914	UP
ENSOMYG00000046983	rgcc	regulator of cell cycle [Source:ZFIN;Acc:ZDB-GENE-040704-31]	1.22143	0.00060636	UP
ENSOMYG00000017134	ERO1B	endoplasmic reticulum oxidoreductase 1 beta [Source:HGNC Symbol;Acc:HGNC:14355]	1.21525	0.0101371	UP
ENSOMYG00000030043	s1pr1	sphingosine-1-phosphate receptor 1 [Source:ZFIN;Acc:ZDB-GENE-001228-2]	1.21173	0.0169263	UP
ENSOMYG00000031832	ADM2	adrenomedullin 2 [Source:HGNC Symbol;Acc:HGNC:28898]	1.2032	0.036202	UP
ENSOMYG00000036643	nox1	NADPH oxidase 1 [Source:ZFIN;Acc:ZDB-GENE-070404-1]	1.20051	0.00563568	UP
ENSOMYG00000027369	arid3b	AT-rich interactive domain 3B [Source:ZFIN;Acc:ZDB-GENE-070209-182]	1.19569	0.00328766	UP
ENSOMYG00000040019	srpra	SRP receptor subunit alpha [Source:ZFIN;Acc:ZDB-GENE-030219-11]	1.16576	0.0265618	UP
ENSOMYG00000046270	CREM	cAMP responsive element modulator [Source:HGNC Symbol;Acc:HGNC:2352]	1.16205	0.00124085	UP
ENSOMYG00000016793	myd88	MYD88 innate immune signal transduction adaptor [Source:ZFIN;Acc:ZDB-GENE-040219-3]	1.15348	0.0393736	UP
ENSOMYG00000046513	stx18	syntaxin 18 [Source:ZFIN;Acc:ZDB-GENE-050522-397]	1.13781	0.0429496	UP
ENSOMYG00000045223	GCN1	GCN1 activator of EIF2AK4 [Source:HGNC Symbol;Acc:HGNC:4199]	1.13251	0.0488806	UP
ENSOMYG00000023514	mapre2	microtubule-associated protein, RP/EB family, member 2 [Source:ZFIN;Acc:ZDB-GENE-071004-41]	1.12075	0.0139796	UP
ENSOMYG00000067017	mafk	v-maf avian musculoaponeurotic fibrosarcoma oncogene homolog K [Source:ZFIN;Acc:ZDB-GENE-040624-9]	1.11958	0.0166831	UP
ENSOMYG00000035628	TFB1M	transcription factor B1, mitochondrial [Source:HGNC Symbol;Acc:HGNC:17037]	1.11089	0.0184646	UP
ENSOMYG00000045181	npas2	neuronal PAS domain protein 2 [Source:ZFIN;Acc:ZDB-GENE-030408-3]	1.10964	0.0106861	UP
ENSOMYG00000000886	JUND	JunD proto-oncogene, AP-1 transcription factor subunit [Source:HGNC Symbol;Acc:HGNC:6206]	1.09612	0.0328893	UP
ENSOMYG00000023544	cebpd	CCAAT enhancer binding protein delta [Source:ZFIN;Acc:ZDB-GENE-020111-4]	1.07617	0.00199149	UP
ENSOMYG00000054802	tm9sf2	transmembrane 9 superfamily member 2 [Source:ZFIN;Acc:ZDB-GENE-030131-6302]	1.07324	7.70938e-05	UP
ENSOMYG00000062182	ACKR3	atypical chemokine receptor 3 [Source:HGNC Symbol;Acc:HGNC:23692]	1.07027	0.01051	UP
ENSOMYG00000053118	mecp2	methyl CpG binding protein 2 [Source:ZFIN;Acc:ZDB-GENE-030131-7190]	1.05925	0.00486705	UP
ENSOMYG00000028948	ift22	intraflagellar transport 22 homolog (Chlamydomonas) [Source:ZFIN;Acc:ZDB-GENE-050417-439]	1.05609	0.0140822	UP
ENSOMYG00000044727	CCN2	cellular communication network factor 2 [Source:HGNC Symbol;Acc:HGNC:2500]	1.04379	0.00112814	UP
ENSOMYG00000057861	mmp9	matrix metallopeptidase 9 [Source:ZFIN;Acc:ZDB-GENE-040426-2132]	1.04195	0.0146024	UP
ENSOMYG00000022630	egln2	egl-9 family hypoxia-inducible factor 2 [Source:ZFIN;Acc:ZDB-GENE-060503-757]	1.04075	0.000972701	UP
ENSOMYG00000041790	slc33a1	solute carrier family 33 member 1 [Source:ZFIN;Acc:ZDB-GENE-040426-1241]	1.012	0.000734346	UP
ENSOMYG00000034166	CDK4	cyclin dependent kinase 4 [Source:HGNC Symbol;Acc:HGNC:1773]	-1.00175	0.030593	DOWN
ENSOMYG00000038542	smc4	structural maintenance of chromosomes 4 [Source:ZFIN;Acc:ZDB-GENE-020419-21]	-1.02026	0.0345519	DOWN
ENSOMYG00000071329	mad2l1	MAD2 mitotic arrest deficient-like 1 (yeast) [Source:ZFIN;Acc:ZDB-GENE-030515-3]	-1.02077	0.0353231	DOWN
ENSOMYG00000000432	dhcr24	24-dehydrocholesterol reductase [Source:ZFIN;Acc:ZDB-GENE-041212-73]	-1.0241	1.38506e-06	DOWN
ENSOMYG00000016694	eif4e2	eukaryotic translation initiation factor 4E family member 2 [Source:ZFIN;Acc:ZDB-GENE-050327-59]	-1.02806	0.0222008	DOWN
ENSOMYG00000019528	SAMD11	sterile alpha motif domain containing 11 [Source:HGNC Symbol;Acc:HGNC:28706]	-1.0294	0.00992295	DOWN
ENSOMYG00000030222	ckap5	cytoskeleton associated protein 5 [Source:ZFIN;Acc:ZDB-GENE-051120-174]	-1.02997	0.00601569	DOWN
ENSOMYG00000012083	gch1	GTP cyclohydrolase 1 [Source:ZFIN;Acc:ZDB-GENE-070720-5]	-1.03297	0.00762754	DOWN
ENSOMYG00000074939	sfxn1	sideroflexin 1 [Source:ZFIN;Acc:ZDB-GENE-040801-45]	-1.04731	0.000142411	DOWN
ENSOMYG00000004457	anapc5	anaphase promoting complex subunit 5 [Source:ZFIN;Acc:ZDB-GENE-030131-1574]	-1.06464	0.0039416	DOWN
ENSOMYG00000008806	CSF1R	colony stimulating factor 1 receptor [Source:HGNC Symbol;Acc:HGNC:2433]	-1.06735	0.00288101	DOWN
ENSOMYG00000040505	cdca8	cell division cycle associated 8 [Source:ZFIN;Acc:ZDB-GENE-041114-171]	-1.068	0.0269457	DOWN
ENSOMYG00000012054	MARCO	macrophage receptor with collagenous structure [Source:HGNC Symbol;Acc:HGNC:6895]	-1.07716	0.0119723	DOWN
ENSOMYG00000026510	rbp4	retinol binding protein 4, plasma [Source:ZFIN;Acc:ZDB-GENE-000210-19]	-1.09514	0.000485851	DOWN
ENSOMYG00000036204	ciao1	cytosolic iron-sulfur assembly component 1 [Source:ZFIN;Acc:ZDB-GENE-040426-839]	-1.09694	0.0115487	DOWN
ENSOMYG00000035896	thoc3	THO complex 3 [Source:ZFIN;Acc:ZDB-GENE-040808-14]	-1.10893	0.0493702	DOWN
ENSOMYG00000045682	cenpf	centromere protein F [Source:ZFIN;Acc:ZDB-GENE-041111-205]	-1.11818	0.0287361	DOWN
ENSOMYG00000022859	S100P	S100 calcium binding protein P [Source:HGNC Symbol;Acc:HGNC:10504]	-1.1482	0.0196373	DOWN
ENSOMYG00000048455	fads2	fatty acid desaturase 2 [Source:ZFIN;Acc:ZDB-GENE-011212-1]	-1.14997	2.26646e-09	DOWN
ENSOMYG00000044822	map2k6	mitogen-activated protein kinase kinase 6 [Source:ZFIN;Acc:ZDB-GENE-010202-3]	-1.15793	0.0210443	DOWN
ENSOMYG00000006735	smo	smoothened, frizzled class receptor [Source:ZFIN;Acc:ZDB-GENE-980526-89]	-1.15864	0.0226179	DOWN
ENSOMYG00000018416	pbk	PDZ binding kinase [Source:ZFIN;Acc:ZDB-GENE-030523-2]	-1.16027	0.00210202	DOWN
ENSOMYG00000039655	raver1	ribonucleoprotein, PTB-binding 1 [Source:ZFIN;Acc:ZDB-GENE-050522-99]	-1.161	0.036005	DOWN
ENSOMYG00000011840	hmmr	hyaluronan-mediated motility receptor (RHAMM) [Source:ZFIN;Acc:ZDB-GENE-030131-731]	-1.16299	0.00200792	DOWN
ENSOMYG00000042181	mcm4	minichromosome maintenance complex component 4 [Source:ZFIN;Acc:ZDB-GENE-030131-9544]	-1.16703	0.000218877	DOWN
ENSOMYG00000011988	wdhd1	WD repeat and HMG-box DNA binding protein 1 [Source:ZFIN;Acc:ZDB-GENE-030131-1665]	-1.18274	0.0103173	DOWN
ENSOMYG00000011474	cd226	CD226 molecule [Source:ZFIN;Acc:ZDB-GENE-070112-1322]	-1.20798	0.0146727	DOWN
ENSOMYG00000005852	hells	helicase, lymphoid specific [Source:ZFIN;Acc:ZDB-GENE-030131-9923]	-1.21177	0.0010037	DOWN
ENSOMYG00000035643	npr3	natriuretic peptide receptor 3 [Source:ZFIN;Acc:ZDB-GENE-060531-91]	-1.22919	0.0159609	DOWN
ENSOMYG00000000722	chaf1a	chromatin assembly factor 1, subunit A (p150) [Source:ZFIN;Acc:ZDB-GENE-030131-5366]	-1.23102	0.00639443	DOWN
ENSOMYG00000036917	foxa1	forkhead box A1 [Source:ZFIN;Acc:ZDB-GENE-990415-78]	-1.24074	0.0170129	DOWN
ENSOMYG00000038605	IGF1	insulin like growth factor 1 [Source:HGNC Symbol;Acc:HGNC:5464]	-1.24265	0.0256357	DOWN
ENSOMYG00000000408	ndufb8	NADH:ubiquinone oxidoreductase subunit B8 [Source:ZFIN;Acc:ZDB-GENE-040426-1858]	-1.24533	0.00241943	DOWN
ENSOMYG00000042032	SNAI2	snail family transcriptional repressor 2 [Source:HGNC Symbol;Acc:HGNC:11094]	-1.26019	0.00435338	DOWN
ENSOMYG00000015503	RPE65	retinoid isomerohydrolase RPE65 [Source:HGNC Symbol;Acc:HGNC:10294]	-1.26103	0.00426143	DOWN
ENSOMYG00000045767	ido1	indoleamine 2,3-dioxygenase 1 [Source:ZFIN;Acc:ZDB-GENE-080228-2]	-1.26449	0.00549765	DOWN
ENSOMYG00000015092	cdkn3	cyclin dependent kinase inhibitor 3 [Source:ZFIN;Acc:ZDB-GENE-060427-2]	-1.26542	0.00187033	DOWN
ENSOMYG00000010238	aspm	assembly factor for spindle microtubules [Source:ZFIN;Acc:ZDB-GENE-050208-620]	-1.27096	0.00469942	DOWN
ENSOMYG00000038193	ST3GAL1	ST3 beta-galactoside alpha-2,3-sialyltransferase 1 [Source:HGNC Symbol;Acc:HGNC:10862]	-1.27525	0.0332679	DOWN
ENSOMYG00000048244	mki67	marker of proliferation Ki-67 [Source:ZFIN;Acc:ZDB-GENE-030131-9771]	-1.29242	0.0162136	DOWN
ENSOMYG00000045084	kif11	kinesin family member 11 [Source:ZFIN;Acc:ZDB-GENE-020426-1]	-1.29601	0.00667635	DOWN
ENSOMYG00000047080	BAIAP2	BAR/IMD domain containing adaptor protein 2 [Source:HGNC Symbol;Acc:HGNC:947]	-1.31076	0.0375437	DOWN
ENSOMYG00000001306	phf19	PHD finger protein 19 [Source:ZFIN;Acc:ZDB-GENE-081105-128]	-1.31963	0.00234746	DOWN
ENSOMYG00000009318	uhrf1	ubiquitin-like with PHD and ring finger domains 1 [Source:ZFIN;Acc:ZDB-GENE-040426-2039]	-1.32703	0.00129544	DOWN
ENSOMYG00000029797	hnf4a	hepatocyte nuclear factor 4, alpha [Source:ZFIN;Acc:ZDB-GENE-030131-1077]	-1.33032	0.0140709	DOWN
ENSOMYG00000006152	ncaph	non-SMC condensin I complex, subunit H [Source:ZFIN;Acc:ZDB-GENE-070112-652]	-1.34388	0.029438	DOWN
ENSOMYG00000003248	wfdc2	WAP four-disulfide core domain 2 [Source:ZFIN;Acc:ZDB-GENE-090313-47]	-1.34673	0.00882163	DOWN
ENSOMYG00000040361	CLSPN	claspin [Source:HGNC Symbol;Acc:HGNC:19715]	-1.35928	0.0292846	DOWN
ENSOMYG00000003398	psat1	phosphoserine aminotransferase 1 [Source:ZFIN;Acc:ZDB-GENE-030131-5723]	-1.39851	0.0147664	DOWN
ENSOMYG00000030943	blm	BLM RecQ like helicase [Source:ZFIN;Acc:ZDB-GENE-070702-5]	-1.41053	0.0197573	DOWN
ENSOMYG00000025741	kpna2	karyopherin alpha 2 (RAG cohort 1, importin alpha 1) [Source:ZFIN;Acc:ZDB-GENE-040718-22]	-1.42914	0.00456343	DOWN
ENSOMYG00000020212	RYR3	ryanodine receptor 3 [Source:HGNC Symbol;Acc:HGNC:10485]	-1.44019	0.00467771	DOWN
ENSOMYG00000044801	cdc20	cell division cycle 20 homolog [Source:ZFIN;Acc:ZDB-GENE-040426-2044]	-1.44499	0.00389636	DOWN
ENSOMYG00000044997	aaas	achalasia, adrenocortical insufficiency, alacrimia [Source:ZFIN;Acc:ZDB-GENE-030912-4]	-1.45423	0.00377978	DOWN
ENSOMYG00000018528	krt5	keratin 5 [Source:ZFIN;Acc:ZDB-GENE-991110-23]	-1.47173	0.0128764	DOWN
ENSOMYG00000004180	tfap2a	transcription factor AP-2 alpha [Source:ZFIN;Acc:ZDB-GENE-011212-6]	-1.47236	0.0354263	DOWN
ENSOMYG00000043188	cytip	cytohesin 1 interacting protein [Source:ZFIN;Acc:ZDB-GENE-140106-76]	-1.48592	0.000292299	DOWN
ENSOMYG00000029603	dio2	iodothyronine deiodinase 2 [Source:ZFIN;Acc:ZDB-GENE-030327-4]	-1.50542	0.000859116	DOWN
ENSOMYG00000027207	cdc45	CDC45 cell division cycle 45 homolog (S. cerevisiae) [Source:ZFIN;Acc:ZDB-GENE-040426-2710]	-1.5134	0.00341534	DOWN
ENSOMYG00000013593	e2f8	E2F transcription factor 8 [Source:ZFIN;Acc:ZDB-GENE-041111-260]	-1.51704	7.3661e-05	DOWN
ENSOMYG00000047763	G6PC2	glucose-6-phosphatase catalytic subunit 2 [Source:HGNC Symbol;Acc:HGNC:28906]	-1.52248	0.0158639	DOWN
ENSOMYG00000010296	exo1	exonuclease 1 [Source:ZFIN;Acc:ZDB-GENE-040426-2828]	-1.52463	0.000469065	DOWN
ENSOMYG00000016252	ddc	dopa decarboxylase [Source:ZFIN;Acc:ZDB-GENE-040426-2656]	-1.53241	0.0191888	DOWN
ENSOMYG00000036854	faslg	Fas ligand (TNF superfamily, member 6) [Source:ZFIN;Acc:ZDB-GENE-070410-16]	-1.53325	0.0429035	DOWN
ENSOMYG00000042158	btc	betacellulin, epidermal growth factor family member [Source:ZFIN;Acc:ZDB-GENE-050311-1]	-1.54093	0.00499606	DOWN
ENSOMYG00000033266	ano6	anoctamin 6 [Source:ZFIN;Acc:ZDB-GENE-081104-64]	-1.54735	0.0114119	DOWN
ENSOMYG00000029486	msh6	mutS homolog 6 (E. coli) [Source:ZFIN;Acc:ZDB-GENE-020905-3]	-1.57045	0.0258698	DOWN
ENSOMYG00000045037	cdk1	cyclin dependent kinase 1 [Source:ZFIN;Acc:ZDB-GENE-010320-1]	-1.58797	0.0200241	DOWN
ENSOMYG00000039505	KIF23	kinesin family member 23 [Source:HGNC Symbol;Acc:HGNC:6392]	-1.59008	0.043396	DOWN
ENSOMYG00000023590	KIF20A	kinesin family member 20A [Source:HGNC Symbol;Acc:HGNC:9787]	-1.59897	0.0328403	DOWN
ENSOMYG00000047551	pbk	PDZ binding kinase [Source:ZFIN;Acc:ZDB-GENE-030523-2]	-1.62607	0.0273857	DOWN
ENSOMYG00000003321	cdc6	cell division cycle 6 homolog (S. cerevisiae) [Source:ZFIN;Acc:ZDB-GENE-050506-131]	-1.62923	0.000319478	DOWN
ENSOMYG00000032542	ect2	epithelial cell transforming 2 [Source:ZFIN;Acc:ZDB-GENE-040831-2]	-1.65775	0.00207785	DOWN
ENSOMYG00000022268	mad2l1	MAD2 mitotic arrest deficient-like 1 (yeast) [Source:ZFIN;Acc:ZDB-GENE-030515-3]	-1.66325	0.0149797	DOWN
ENSOMYG00000037774	TRAF5	TNF receptor associated factor 5 [Source:HGNC Symbol;Acc:HGNC:12035]	-1.71182	0.00451875	DOWN
ENSOMYG00000057661	cdca5	cell division cycle associated 5 [Source:ZFIN;Acc:ZDB-GENE-030131-235]	-1.73494	0.0417292	DOWN
ENSOMYG00000046774	KIF20A	kinesin family member 20A [Source:HGNC Symbol;Acc:HGNC:9787]	-1.76039	0.00369107	DOWN
ENSOMYG00000039583	ccnb1	cyclin B1 [Source:ZFIN;Acc:ZDB-GENE-000406-10]	-1.76052	7.31243e-05	DOWN
ENSOMYG00000022421	spc24	SPC24 component of NDC80 kinetochore complex [Source:ZFIN;Acc:ZDB-GENE-050522-456]	-1.7926	0.0393332	DOWN
ENSOMYG00000047004	gins4	GINS complex subunit 4 (Sld5 homolog) [Source:ZFIN;Acc:ZDB-GENE-040801-59]	-1.82935	0.00187137	DOWN
ENSOMYG00000038123	ttk	ttk protein kinase [Source:ZFIN;Acc:ZDB-GENE-030123-1]	-1.8573	0.000764951	DOWN
ENSOMYG00000035594	vrk1	VRK serine/threonine kinase 1 [Source:ZFIN;Acc:ZDB-GENE-040426-2709]	-1.85998	0.00138587	DOWN
ENSOMYG00000042429	lck	LCK proto-oncogene, Src family tyrosine kinase [Source:ZFIN;Acc:ZDB-GENE-040617-1]	-1.87136	0.01979	DOWN
ENSOMYG00000029971	kpna2	karyopherin alpha 2 (RAG cohort 1, importin alpha 1) [Source:ZFIN;Acc:ZDB-GENE-040718-22]	-1.87584	3.06383e-05	DOWN
ENSOMYG00000043170	RRM2	ribonucleotide reductase regulatory subunit M2 [Source:HGNC Symbol;Acc:HGNC:10452]	-1.88628	0.00202205	DOWN
ENSOMYG00000028291	trip13	thyroid hormone receptor interactor 13 [Source:ZFIN;Acc:ZDB-GENE-040426-1488]	-1.89831	0.00346278	DOWN
ENSOMYG00000010384	gins4	GINS complex subunit 4 (Sld5 homolog) [Source:ZFIN;Acc:ZDB-GENE-040801-59]	-1.90113	0.00992525	DOWN
ENSOMYG00000041856	cdk1	cyclin dependent kinase 1 [Source:ZFIN;Acc:ZDB-GENE-010320-1]	-1.95013	0.0248652	DOWN
ENSOMYG00000069397	mcm3	minichromosome maintenance complex component 3 [Source:ZFIN;Acc:ZDB-GENE-020419-4]	-1.9845	0.00163306	DOWN
ENSOMYG00000029221	mcm5	minichromosome maintenance complex component 5 [Source:ZFIN;Acc:ZDB-GENE-021209-1]	-1.99016	0.00156607	DOWN
ENSOMYG00000017817	cdc6	cell division cycle 6 homolog (S. cerevisiae) [Source:ZFIN;Acc:ZDB-GENE-050506-131]	-2.00274	0.00754196	DOWN
ENSOMYG00000019951	cdt1	chromatin licensing and DNA replication factor 1 [Source:ZFIN;Acc:ZDB-GENE-070111-1]	-2.00906	0.000191041	DOWN
ENSOMYG00000008695	sox12	SRY-box transcription factor 12 [Source:ZFIN;Acc:ZDB-GENE-040724-33]	-2.01093	0.0340301	DOWN
ENSOMYG00000047653	ccnb1	cyclin B1 [Source:ZFIN;Acc:ZDB-GENE-000406-10]	-2.01169	0.0188659	DOWN
ENSOMYG00000041944	kif11	kinesin family member 11 [Source:ZFIN;Acc:ZDB-GENE-020426-1]	-2.014	0.00506025	DOWN
ENSOMYG00000054974	cks2	CDC28 protein kinase regulatory subunit 2 [Source:ZFIN;Acc:ZDB-GENE-050208-508]	-2.02648	0.0202831	DOWN
ENSOMYG00000041834	pif1	PIF1 5'-to-3' DNA helicase homolog (S. cerevisiae) [Source:ZFIN;Acc:ZDB-GENE-030131-4928]	-2.04898	0.0130437	DOWN
ENSOMYG00000033325	mcm2	minichromosome maintenance complex component 2 [Source:ZFIN;Acc:ZDB-GENE-020419-24]	-2.08867	9.23011e-05	DOWN
ENSOMYG00000031800	mcm2	minichromosome maintenance complex component 2 [Source:ZFIN;Acc:ZDB-GENE-020419-24]	-2.10472	5.05976e-05	DOWN
ENSOMYG00000034475	CCNA2	cyclin A2 [Source:HGNC Symbol;Acc:HGNC:1578]	-2.11295	0.00168168	DOWN
ENSOMYG00000053448	cks2	CDC28 protein kinase regulatory subunit 2 [Source:ZFIN;Acc:ZDB-GENE-050208-508]	-2.13704	0.027039	DOWN
ENSOMYG00000017239	e2f7	E2F transcription factor 7 [Source:ZFIN;Acc:ZDB-GENE-030131-3527]	-2.14645	0.00266532	DOWN
ENSOMYG00000022528	mcm5	minichromosome maintenance complex component 5 [Source:ZFIN;Acc:ZDB-GENE-021209-1]	-2.21928	3.04188e-09	DOWN
ENSOMYG00000019518	NASP	nuclear autoantigenic sperm protein [Source:HGNC Symbol;Acc:HGNC:7644]	-2.23963	0.00184634	DOWN
ENSOMYG00000022980	dio2	iodothyronine deiodinase 2 [Source:ZFIN;Acc:ZDB-GENE-030327-4]	-2.2709	2.72497e-09	DOWN
ENSOMYG00000036024	pitx2	paired-like homeodomain 2 [Source:ZFIN;Acc:ZDB-GENE-990714-27]	-2.29809	0.0177704	DOWN
ENSOMYG00000021668	spp1	secreted phosphoprotein 1 [Source:ZFIN;Acc:ZDB-GENE-050706-97]	-2.30978	0.0339097	DOWN
ENSOMYG00000037794	cenpx	centromere protein X [Source:ZFIN;Acc:ZDB-GENE-110411-78]	-2.34388	2.00854e-05	DOWN
ENSOMYG00000018441	chaf1b	chromatin assembly factor 1, subunit B [Source:ZFIN;Acc:ZDB-GENE-040426-1947]	-2.40495	5.84528e-05	DOWN
ENSOMYG00000034605	bfsp2	beaded filament structural protein 2, phakinin [Source:ZFIN;Acc:ZDB-GENE-041212-58]	-2.43366	0.0406874	DOWN
ENSOMYG00000070417	dnase1	deoxyribonuclease I [Source:ZFIN;Acc:ZDB-GENE-040718-423]	-2.4678	0.0402441	DOWN
ENSOMYG00000020121	SLC25A19	solute carrier family 25 member 19 [Source:HGNC Symbol;Acc:HGNC:14409]	-2.52254	0.014536	DOWN
ENSOMYG00000041456	raly	RALY heterogeneous nuclear ribonucleoprotein [Source:ZFIN;Acc:ZDB-GENE-041010-127]	-2.58046	0.0241459	DOWN
ENSOMYG00000013814	ddc	dopa decarboxylase [Source:ZFIN;Acc:ZDB-GENE-040426-2656]	-2.75702	0.000763105	DOWN
ENSOMYG00000031865	rad54l	RAD54 like [Source:ZFIN;Acc:ZDB-GENE-040426-968]	-2.76298	1.01489e-05	DOWN
ENSOMYG00000011223	DLK1	delta like non-canonical Notch ligand 1 [Source:HGNC Symbol;Acc:HGNC:2907]	-2.78574	0.0445703	DOWN
ENSOMYG00000032775	KCTD15	potassium channel tetramerization domain containing 15 [Source:HGNC Symbol;Acc:HGNC:23297]	-2.79446	0.0333343	DOWN
ENSOMYG00000040044	med20	mediator complex subunit 20 [Source:ZFIN;Acc:ZDB-GENE-040801-104]	-2.81057	0.00912682	DOWN
ENSOMYG00000041903	mis12	MIS12 kinetochore complex component [Source:ZFIN;Acc:ZDB-GENE-040426-1372]	-2.9881	0.000449048	DOWN
ENSOMYG00000016848	MIR150	microRNA 150 [Source:HGNC Symbol;Acc:HGNC:31537]	-3.22773	0.0336435	DOWN
ENSOMYG00000044234	BCAT1	branched chain amino acid transaminase 1 [Source:HGNC Symbol;Acc:HGNC:976]	-3.36124	0.00486228	DOWN
ENSOMYG00000005651	dnase1	deoxyribonuclease I [Source:ZFIN;Acc:ZDB-GENE-040718-423]	-3.40528	0.017079	DOWN
ENSOMYG00000013490	p2rx2	purinergic receptor P2X, ligand-gated ion channel, 2 [Source:ZFIN;Acc:ZDB-GENE-030319-2]	-4.13413	0.0361364	DOWN
ENSOMYG00000060656	HTR2A	5-hydroxytryptamine receptor 2A [Source:HGNC Symbol;Acc:HGNC:5293]	-4.17121	0.00842479	DOWN
ENSOMYG00000024041	MIR125B1	microRNA 125b-1 [Source:HGNC Symbol;Acc:HGNC:31506]	-4.38342	0.0117607	DOWN
ENSOMYG00000038532	ush1c	Usher syndrome 1C [Source:ZFIN;Acc:ZDB-GENE-060312-41]	-4.43524	0.0117157	DOWN
ENSOMYG00000020181	nppb	natriuretic peptide B [Source:ZFIN;Acc:ZDB-GENE-130530-642]	-4.50346	0.01747	DOWN
ENSOMYG00000034062	optc	opticin [Source:ZFIN;Acc:ZDB-GENE-030131-1798]	-4.50346	0.01747	DOWN
ENSOMYG00000069209	MIR23A	microRNA 23a [Source:HGNC Symbol;Acc:HGNC:31605]	-4.52248	0.00866593	DOWN
ENSOMYG00000000651	hsf4	heat shock transcription factor 4 [Source:ZFIN;Acc:ZDB-GENE-050306-18]	-4.55593	0.00721815	DOWN
ENSOMYG00000020940	pgm3	phosphoglucomutase 3 [Source:ZFIN;Acc:ZDB-GENE-041024-13]	-4.64298	0.00580498	DOWN
ENSOMYG00000000542	LIN28B	lin-28 homolog B [Source:HGNC Symbol;Acc:HGNC:32207]	-4.65868	0.00628459	DOWN
ENSOMYG00000003145	cryba4	crystallin, beta A4 [Source:ZFIN;Acc:ZDB-GENE-050522-143]	-5.48497	7.34676e-05	DOWN
